# Supplementary material for: Regional Distribution of Klebsiella pneumoniae Virulence Genes: Insights from a Comparative Genome Analysis
Source: Research Square preprint supplement (doi:10.21203/rs.3.rs-7763903/v1), 2025-12-04
Supplement: Supplementary file 1 [file 74720f40fbac711702761206.xlsx]

## Sheet: Table S1
Supplementary File:
Accession Numbers	Location	Continent	ST	Aerobactin	Salmochelin	RmpADC	rmpA2	K_locus	Peg_344	Bla_ESBL_acquired	Bla_Carb_acquired
GCA_000693075.1	USA	North America	ST592	iuc 1	iro 1	rmp 1; KpVP-1	rmpA2_3-47%	KL57	1	-	-
GCA_000693815.1	USA	North America	ST25	iuc 3	iro 3 (truncated)	rmp 3; ICEKp1	-	KL2	0	-	KPC-3
GCA_000693895.1	USA	North America	ST25	iuc 3	iro 3 (truncated)	rmp 3; ICEKp1	-	KL2	0	-	KPC-3
GCA_000742755.1	USA	North America	ST493	-	iro 3 (truncated)	rmp 3; ICEKp1	-	KL2	0	-	-
GCA_000747055.1	Malaysia	Southeast Asia	ST3583	iuc 2	iro 2	rmp 2; KpVP-2	-	KL2	0	-	-
GCA_000949515.1	Germany	Europe	ST375	iuc 1	iro 1	rmp 1; KpVP-1,-	rmpA2_5-54%	KL2	1	-	-
GCA_001031485.1	USA	North America	ST258	iuc 5	iro 5	-	-	KL107	0	SHV-12	KPC-3
GCA_001033445.1	USA	North America	ST25	iuc 1	iro 1	rmp 1; KpVP-1	rmpA2_8-60%	KL2	1	-	-
GCA_001529935.1	China	East Asia	ST23	iuc 1	iro 1	rmp 1; KpVP-1	rmpA2_5-54%	KL1	1	-	-
GCA_001530015.1	China	East Asia	ST374	iuc 1	iro 1	rmp 1; KpVP-1	rmpA2_5-54%	KL2	1	-	-
GCA_001630805.1	China	East Asia	ST29	iuc 1	iro 1	rmp 1; KpVP-1,-	rmpA2_8-60%	KL54	0	CTX-M-14	-
GCA_001679915.1	Italy	Europe	ST512	iuc 5	-	-	-	KL107	0	-	KPC-3
GCA_001707135.1	USA	North America	ST23	-	-	-	-	KL1	0.4399	-	-
GCA_001708225.1	Taiwan	East Asia	ST23	iuc 1	iro 1	rmp 1; KpVP-1 (truncated)	rmpA2_5-54%	KL1	1	-	-
GCA_001720695.1	Netherlands	Europe	ST493	-	iro 3 (truncated)	rmp 3; ICEKp1	-	KL2	0	-	-
GCA_001902335.1	Germany	Europe	ST23	iuc 1	-	rmp 1; KpVP-1 (truncated)	rmpA2_8*-60%	KL57	0	-	OXA-48
GCA_001939855.1	China	East Asia	ST23	iuc 1	iro 1	rmp 1; KpVP-1,-	rmpA2_8-60%	KL1	1	-	-
GCA_001939885.2	China	East Asia	ST485	iuc 1	iro 1	rmp 1; KpVP-1	rmpA2_6*-47%	KL5	1	-	-
GCA_001970155.2	Russia	Europe	ST23	iuc 1	-	rmp unknown	rmpA2_8*	KL57	1	CTX-M-55	-
GCA_001970165.2	Russia	Europe	ST395	iuc 1	-	-	-	KL2	1	CTX-M-15	OXA-48
GCA_002087215.1	United Kingdom	Europe	ST147	iuc 1	-	rmp 1; KpVP-1	rmpA2_6*-47%	KL35	1	CTX-M-15	NDM-1
GCA_002114225.1	Russia	Europe	ST23	iuc 1	iro 1	-	-	unknown (KL1)	1	-	-
GCA_002153255.1	USA	North America	ST23	iuc 1	iro 1	-	-	unknown (KL1)	1	-	-
GCA_002163895.1	China	East Asia	ST23	iuc 1	iro 3 (truncated),iro unknown	rmp 3; ICEKp1,rmp 1; KpVP-1	rmpA2_6-60%	KL1	1	SHV-12;SHV-12^	-
GCA_002173825.1	China	East Asia	ST25	iuc 3	iro 3 (truncated)	rmp 3; ICEKp1 (incomplete)	-	unknown (KL2)	0	-	-
GCA_002173875.1	China	East Asia	ST23	iuc 1 (incomplete)	iro 1	rmp 1; KpVP-1,-	rmpA2_3*-47%	KL1	1	-	-
GCA_002173885.1	China	East Asia	ST23-1LV	iuc 1	iro 1	rmp 1; KpVP-1,-	rmpA2_5-54%	KL1	1	-	-
GCA_002173965.1	China	East Asia	ST76-1LV	-	iro 3 (truncated)	-	-	unknown (KL5)	0	-	-
GCA_002174015.1	China	East Asia	ST29	iuc 1	iro 1	rmp 1; KpVP-1,-	rmpA2_8-60%	KL54	1	-	-
GCA_002205995.1	China	East Asia	ST660	iuc 1	iro 1	-	-	unknown (KL16)	1	-	-
GCA_002206015.1	China	East Asia	ST23	iuc 1	iro 1	rmp 1; KpVP-1,-	rmpA2_3-47%	KL1	1	-	-
GCA_002210445.1	United Kingdom	Europe	ST23	iuc 1	iro 1	rmp 1; KpVP-1	rmpA2_6-60%	KL1	1	-	OXA-48;OXA-48
GCA_002239805.1	Thailand	Southeast Asia	ST231	iuc 5	-	-	-	KL51	0	-	OXA-232
GCA_002239815.1	Thailand	Southeast Asia	ST231	iuc 5	-	-	-	KL51	0	-	OXA-232
GCA_002246075.1	Thailand	Southeast Asia	ST35	iuc 3	-	-	-	KL108	0	CTX-M-55^	-
GCA_002246125.1	Thailand	Southeast Asia	ST231	iuc 5	-	-	-	KL51	0	-	OXA-232
GCA_002246155.1	Thailand	Southeast Asia	ST231	iuc 5	-	-	-	KL51	0	CTX-M-15	-
GCA_002246355.1	Thailand	Southeast Asia	ST231	iuc 5	-	-	-	KL51	0	CTX-M-15	OXA-232
GCA_002246435.1	Thailand	Southeast Asia	ST231	iuc 5	-	-	-	KL51	0	-	OXA-232
GCA_002246455.1	Thailand	Southeast Asia	ST231	iuc 5	-	-	-	KL51	0	CTX-M-15	OXA-232
GCA_002246475.1	Thailand	Southeast Asia	ST231	iuc 5	-	-	-	KL51	0	CTX-M-15	OXA-232
GCA_002246655.1	Thailand	Southeast Asia	ST231	iuc 5	-	-	-	KL51	0	CTX-M-15	OXA-232
GCA_002246685.1	Thailand	Southeast Asia	ST231	iuc 5	-	-	-	KL51	0	-	OXA-232
GCA_002246765.1	Thailand	Southeast Asia	ST231	iuc 5	-	-	-	unknown (KL51)	0	-	OXA-232
GCA_002246845.1	Thailand	Southeast Asia	ST231	iuc 5	-	-	-	KL51	0	-	OXA-232
GCA_002247385.1	Thailand	Southeast Asia	ST231	iuc 5	-	-	-	KL51	0	-	OXA-232
GCA_002248135.1	Thailand	Southeast Asia	ST1867	iuc 3	-	-	-	KL123	0	CTX-M-14	-
GCA_002251875.3	Thailand	Southeast Asia	ST3541	iuc 3	-	-	-	KL123	0	CTX-M-14	-
GCA_002251895.1	Thailand	Southeast Asia	ST231	iuc 5	-	-	-	KL51	0	CTX-M-15	OXA-232
GCA_002257935.4	China	East Asia	ST36	iuc 1	iro 1	rmp 1; KpVP-1	rmpA2_4*-34%	KL62	1	-	KPC-2
GCA_002261665.1	China	East Asia	ST11	-	-	rmp 1; KpVP-1	-	KL64	0	CTX-M-65	KPC-2
GCA_002261675.1	China	East Asia	ST11	iuc 1	-	-	-	KL47	1	CTX-M-14^	KPC-2
GCA_002261735.1	China	East Asia	ST11	iuc 1	-	-	rmpA2_2-54%	KL47	0	CTX-M-65	KPC-2
GCA_002261825.1	China	East Asia	ST11	iuc 1	-	rmp 1; KpVP-1,-	rmpA2_3-47%	KL64	1	CTX-M-65	KPC-2
GCA_002261875.1	China	East Asia	ST11	iuc 1	-	rmp 1; KpVP-1,-	rmpA2_3-47%	KL64	1	CTX-M-65	KPC-2
GCA_002261975.1	China	East Asia	ST11	iuc 1	-	rmp 1; KpVP-1,-	rmpA2_3-47%	KL64	1	CTX-M-65	KPC-2
GCA_002262035.1	China	East Asia	ST11	iuc 1	-	rmp 1; KpVP-1,-	rmpA2_3-47%	KL64	1	CTX-M-65	KPC-2
GCA_002262065.1	China	East Asia	ST11	iuc 1	-	-	rmpA2_9	KL47	1	-	KPC-2
GCA_002262075.1	China	East Asia	ST11	iuc 1	-	-	rmpA2_9	KL47	1	CTX-M-14^	KPC-2
GCA_002262135.1	China	East Asia	ST11	-	-	rmp 1; KpVP-1	-	KL64	0	CTX-M-65	KPC-2
GCA_002262185.1	China	East Asia	ST11	iuc 1	-	rmp 1; KpVP-1,-	rmpA2_3-47%	KL64	0	CTX-M-65	KPC-2
GCA_002262215.1	China	East Asia	ST11	iuc 1	-	rmp 1; KpVP-1,-	rmpA2_3-47%	KL64	1	CTX-M-65;SHV-12	KPC-2
GCA_002262225.1	China	East Asia	ST11	iuc 1	-	rmp 1; KpVP-1,-	rmpA2_3-47%	KL64	1	CTX-M-65	KPC-2
GCA_002262235.1	China	East Asia	ST11	iuc 1	-	rmp 1; KpVP-1,-	rmpA2_3-47%	KL64	1	CTX-M-65	KPC-2
GCA_002262375.1	China	East Asia	ST11	iuc 1	-	rmp 1; KpVP-1,-	rmpA2_3-47%	KL64	1	CTX-M-65	KPC-2
GCA_002262425.1	China	East Asia	ST11	iuc 1	-	rmp 1; KpVP-1,-	rmpA2_3-47%	KL64	1	CTX-M-65	KPC-2
GCA_002262465.1	China	East Asia	ST11	iuc 1	-	-	rmpA2_9	KL47	1	CTX-M-14^	KPC-2
GCA_002262475.1	China	East Asia	ST11	iuc 1	-	rmp 1; KpVP-1 (truncated),-	rmpA2_3-47%	KL64	1	CTX-M-65	KPC-2
GCA_002262485.1	China	East Asia	ST11	iuc 1	-	rmp 1; KpVP-1,-	rmpA2_3-47%	KL64	1	CTX-M-65	KPC-2
GCA_002262625.1	China	East Asia	ST11	iuc 1	-	-	rmpA2_3-47%	KL64	1	CTX-M-65	KPC-2
GCA_002262675.1	China	East Asia	ST11	iuc 1	-	-	rmpA2_2-54%	KL47	1	CTX-M-14^	KPC-2
GCA_002264195.1	China	East Asia	ST23	iuc 1	iro 1	rmp 1; KpVP-1,-	rmpA2_5-54%	KL1	1	-	NDM-1
GCA_002264435.1	China	East Asia	ST23	iuc 1	-	-	rmpA2_3-47%	KL1	1	-	KPC-2
GCA_002264545.1	China	East Asia	ST11	iuc 5	iro unknown	-	-	KL64	0	-	KPC-2
GCA_002264785.1	China	East Asia	ST11	iuc 1	iro 1	rmp 1; KpVP-1,-	rmpA2_6-60%	KL47	0	CTX-M-65	KPC-2
GCA_002264795.1	China	East Asia	ST11	iuc 1	-	-	rmpA2_2-54%	KL47	1	CTX-M-65;SHV-129*?	KPC-2
GCA_002264845.1	China	East Asia	ST268	iuc 1	-	-	rmpA2_8*	KL20	1	-	KPC-2
GCA_002264925.1	China	East Asia	ST11	iuc 1	-	-	rmpA2_2-54%	KL47	1	CTX-M-65	KPC-2
GCA_002269805.1	China	East Asia	ST305	iuc 3	-	-	-	KL35	0	-	-
GCA_002269865.1	China	East Asia	ST3712	iuc 3	-	-	-	KL16	0	-	-
GCA_002369925.1	China	East Asia	ST23	iuc 1	iro 1	rmp 1; KpVP-1 (truncated)	rmpA2_5-54%	KL1	1	CTX-M-55	KPC-2
GCA_002369935.1	China	East Asia	ST11	iuc 1	-	-	rmpA2_9*	unknown (KL47)	1	CTX-M-65	KPC-2
GCA_002369985.1	China	East Asia	ST11	iuc 1	-	-	rmpA2_9	KL47	1	CTX-M-65	KPC-2
GCA_002370005.1	China	East Asia	ST11	iuc 1	-	-	-	KL47	1	CTX-M-65	KPC-2
GCA_002370055.1	China	East Asia	ST11	iuc 1	-	-	rmpA2_9	KL47	1	CTX-M-65	KPC-2
GCA_002370065.1	China	East Asia	ST11	iuc 1	-	-	rmpA2_2*-54%	KL47	1	CTX-M-65	KPC-2
GCA_002740615.1	China	East Asia	ST11	iuc 1	-	rmp 1; KpVP-1 (truncated)	rmpA2_3-47%	KL64	1	CTX-M-65	KPC-2
GCA_002740625.1	China	East Asia	ST11	iuc 1	-	rmp 1; KpVP-1,-	rmpA2_3-47%	KL64	1	CTX-M-65	KPC-2
GCA_002740645.1	China	East Asia	ST11	iuc 1	-	rmp 1; KpVP-1,-	rmpA2_3-47%	KL64	1	CTX-M-65	KPC-2
GCA_002752955.1	Thailand	Southeast Asia	ST45	iuc 3	-	-	-	KL7	0	CTX-M-55	-
GCA_002761315.1	China	East Asia	ST23	iuc 1 (truncated)	iro 1	rmp 1; KpVP-1	rmpA2_3-47%	KL1	1	-	-
GCA_002844975.1	China	East Asia	ST11	iuc 1	iro 1 (incomplete) (truncated)	rmp 1; KpVP-1,-	rmpA2_6-60%	KL47	1	CTX-M-65	KPC-2
GCA_002844995.1	China	East Asia	ST11	iuc 1	-	rmp 1; KpVP-1,-	rmpA2_3-47%	KL64	1	CTX-M-65;SHV-12	KPC-2
GCA_002845075.1	China	East Asia	ST11	iuc 1	iro 1 (incomplete) (truncated)	rmp 1; KpVP-1,-	rmpA2_6-60%	KL47	1	CTX-M-65	KPC-2
GCA_002845185.1	China	East Asia	ST11	iuc 1	-	rmp 1; KpVP-1,-	rmpA2_3-47%	KL64	1	SHV-12	KPC-2
GCA_002845865.1	China	East Asia	ST485	iuc 1	iro 1	rmp 1; KpVP-1	rmpA2_6*-47%	unknown (KL5)	1	-	-
GCA_002848585.1	China	East Asia	ST11	iuc 1	-	-	rmpA2_8-60%	KL47	1	CTX-M-65;SHV-12	KPC-2
GCA_002850335.1	Germany	Europe	ST383	-	-	rmp 1; KpVP-1	-	unknown (KL5)	0	CTX-M-14^	OXA-48
GCA_002850355.1	Germany	Europe	ST383	-	-	rmp 1; KpVP-1	-	KL30	0	CTX-M-9*	OXA-48
GCA_002851495.1	Colombia	South America	ST77	-	iro 3 (truncated)	rmp 3; ICEKp1 (truncated)	-	KL55	0	CTX-M-96;SHV-12*	-
GCA_002851855.1	China	East Asia	ST23	iuc 1	iro 1	rmp 1; KpVP-1,-	rmpA2_3-47%	KL1	1	-	-
GCA_002852035.1	China	East Asia	ST700	iuc 3	iro 3 (truncated)	rmp 3; ICEKp1	-	KL1	0	CTX-M-14	-
GCA_002852065.1	China	East Asia	ST700	iuc 3	iro 3 (truncated)	rmp 3; ICEKp1	-	KL1	0	CTX-M-14	-
GCA_002852615.1	China	East Asia	ST412	-	iro 1	rmp 1; KpVP-1,-	rmpA2_3-47%	KL57	1	-	-
GCA_002852975.3	China	East Asia	ST11	iuc 1	-	rmp 1; KpVP-1	rmpA2_3-47%	KL64	1	CTX-M-65;SHV-12	KPC-2
GCA_002853115.2	China	East Asia	ST23	iuc 1	iro 1	rmp 1; KpVP-1	rmpA2_5-54%	KL1	1	-	-
GCA_002853165.1	China	East Asia	ST660	iuc 1	iro 1	rmp 1; KpVP-1 (truncated),-	rmpA2_6-60%	KL16	1	-	-
GCA_002853735.1	Colombia	South America	ST35	iuc 3	-	-	-	KL22	0	CTX-M-12	-
GCA_002861655.1	China	East Asia	ST11	iuc 1	iro 1 (incomplete) (truncated)	rmp 1; KpVP-1,-	rmpA2_6-60%	KL47	1	CTX-M-65	KPC-2
GCA_002861705.1	China	East Asia	ST11	iuc 1	-	-,-	rmpA2_3-47%	unknown (KL64)	1	SHV-12	KPC-2
GCA_002870865.1	China	East Asia	ST485	iuc 1,iuc 1	iro 1,iro 1	rmp 1; KpVP-1,rmp 1; KpVP-1	rmpA2_6*-47%,rmpA2_6*-47%	KL5	1	-	-
GCA_002870885.1	China	East Asia	ST23	iuc 1	-	-	rmpA2_8-60%	KL1	1	-	-
GCA_002870905.1	China	East Asia	ST23	iuc 1	iro 1	rmp unknown	rmpA2_8*-60%	KL1	1	-	-
GCA_002870925.1	China	East Asia	ST23	iuc 1	iro 1	rmp 1; KpVP-1	rmpA2_5-54%	KL1	0	-	-
GCA_002870945.1	China	East Asia	ST1941	iuc 1	iro 1	rmp 1; KpVP-1 (truncated)	rmpA2_6*-47%	KL1	0	-	-
GCA_002887675.1	China	East Asia	ST375	iuc 1	iro 1	rmp 1; KpVP-1	-	KL2	0	-	-
GCA_002887745.1	China	East Asia	ST375	iuc 1	iro 1	rmp 1; KpVP-1	-	KL2	0	-	-
GCA_002909775.2	India	South Asia	ST231	iuc 5	-	-	-	unknown (KL51)	0	-	OXA-232
GCA_002934725.1	China	East Asia	ST420	iuc 1	iro 1	rmp 1; KpVP-1	-	KL20	1	-	-
GCA_002944845.1	China	East Asia	ST86	iuc 1	iro 1	rmp 1; KpVP-1 (truncated)	rmpA2_9	KL2	1	CTX-M-3;CTX-M-65	KPC-2;NDM-1
GCA_002970405.2	USA	North America	ST231	iuc 5	-	-	-	KL51	0	-	OXA-232
GCA_002991725.1	China	East Asia	ST37	iuc 3	-	-	-	KL25	0	CTX-M-3	-
GCA_002992025.1	China	East Asia	ST37	iuc 3	-	-	-	KL25	0	CTX-M-3	-
GCA_003037185.2	China	East Asia	ST23	iuc 1	iro 1	rmp 1; KpVP-1	rmpA2_8-60%	KL1	1	CTX-M-15;SHV-12	NDM-1
GCA_003038215.3	China	East Asia	ST11	iuc 1	-	-	rmpA2_6*-55%	KL47	1	CTX-M-65;SHV-12	KPC-2
GCA_003054865.1	United Kingdom	Europe	ST25	-	iro 3 (truncated)	rmp 3; ICEKp1	-	KL2	0	-	-
GCA_003065165.1	USA	North America	ST3690	iuc 2	iro 2	rmp 2; KpVP-2 (truncated)	-	unknown (KL2)	0	-	-
GCA_003111885.2	China	East Asia	ST11	iuc 1,iuc 1	-	-,-	rmpA2_9,rmpA2_9	KL47	1	CTX-M-14^	KPC-2
GCA_003112125.1	China	East Asia	ST11	iuc 1	-	rmp 1; KpVP-1	rmpA2_3-47%	KL64	1	CTX-M-65;SHV-12;SHV-12	KPC-2
GCA_003196515.1	USA	North America	ST1333	-	iro 3 (truncated)	rmp 3; ICEKp1	-	KL5	0	-	-
GCA_003203435.1	Taiwan	East Asia	ST11	iuc 1	iro 1	rmp 1; KpVP-1	rmpA2_8*	KL47	1	-	KPC-2
GCA_003286995.1	China	East Asia	ST1660	iuc 1	iro 1	rmp 1; KpVP-1	rmpA2_8*-60%	KL1	1	-	KPC-2
GCA_003312125.1	China	East Asia	ST11	-	-	rmp 1; KpVP-1	-	KL64	0	CTX-M-65;SHV-12	KPC-2
GCA_003312135.1	China	East Asia	ST11	iuc 1	-	rmp 1; KpVP-1,-	rmpA2_3-47%	KL64	1	CTX-M-65	KPC-2
GCA_003312185.1	China	East Asia	ST11	iuc 1	iro 1 (incomplete)	-	rmpA2_8*	KL64	1	CTX-M-3	KPC-2
GCA_003312205.1	China	East Asia	ST11	iuc 1	iro 1 (incomplete)	-	rmpA2_8*	unknown (KL107)	1	CTX-M-3	KPC-2
GCA_003330945.1	South Korea	East Asia	ST375	iuc 1	iro 1	rmp 1; KpVP-1	rmpA2_3-47%	KL2	1	-	-
GCA_003334885.1	USA	North America	ST23	iuc 1	iro 1	rmp 1; KpVP-1	rmpA2_6-60%	KL1	1	-	-
GCA_003334925.1	USA	North America	ST23	iuc 1	iro 1	rmp 1; KpVP-1	rmpA2_6-60%	KL1	1	-	-
GCA_003335005.1	USA	North America	ST23	iuc 1	iro 1	rmp 1; KpVP-1 (truncated)	rmpA2_8*-7%	KL1	1	-	-
GCA_003335025.1	USA	North America	ST23	iuc 1	iro 1	rmp 1; KpVP-1	rmpA2_6-60%	KL1	1	-	-
GCA_003345685.1	USA	North America	ST23	iuc 1	iro 1	rmp 1; KpVP-1,-	rmpA2_6-60%	KL1	1	-	-
GCA_003400925.1	USA	North America	ST395	iuc 1	-	-	rmpA2_9	KL108	1	-	NDM-1
GCA_003401435.1	USA	North America	ST231	iuc 5	-	-	-	KL51	0	-	OXA-232
GCA_003402995.1	China	East Asia	ST11	iuc 1	-	rmp 1; KpVP-1	rmpA2_3-47%	KL64	1	CTX-M-65;SHV-12	KPC-2
GCA_003410395.1	China	East Asia	ST11	iuc 1	-	-	rmpA2_9	KL47	1	CTX-M-65^;CTX-M-90^	KPC-2
GCA_003437255.1	China	East Asia	ST23	iuc 1	iro 1	rmp 1; KpVP-1,-	rmpA2_3-47%	KL1	1	-	-
GCA_003466135.1	China	East Asia	ST268	iuc 1	iro 1	rmp 1; KpVP-1,-	rmpA2_8*	KL20	1	-	-
GCA_003475175.1	China	East Asia	ST29	-	iro 1	rmp 1; KpVP-1	-	KL54	1	-	-
GCA_003569845.1	China	East Asia	ST2237	iuc 1	-	-	rmpA2_8-60%	KL19	1	-	KPC-2
GCA_003569855.1	China	East Asia	ST2237	iuc 1	-	-	rmpA2_8-60%	KL19	1	-	KPC-2
GCA_003571025.1	New Zealand	Oceania	ST2843	iuc 3	-	-	-	KL114	0	-	-
GCA_003571035.1	New Zealand	Oceania	ST2843	iuc 3	-	-	-	KL114	0	-	-
GCA_003571065.1	New Zealand	Oceania	ST86	iuc 1	iro 1	rmp 1; KpVP-1	-	KL2	1	-	-
GCA_003571125.1	New Zealand	Oceania	ST86	-	iro 1	rmp 1; KpVP-1	-	KL2	1	-	-
GCA_003571145.1	New Zealand	Oceania	ST86	-	iro 1	rmp 1; KpVP-1	-	KL2	1	-	-
GCA_003571155.1	New Zealand	Oceania	ST86	iuc 1	iro 1	rmp 1; KpVP-1	-	KL2	1	-	-
GCA_003573715.1	New Zealand	Oceania	ST86	-	iro 1	rmp 1; KpVP-1	-	KL2	1	-	-
GCA_003573725.1	New Zealand	Oceania	ST86	-	iro 1	rmp 1; KpVP-1	-	KL2	1	-	-
GCA_003573755.1	New Zealand	Oceania	ST86	-	iro 1	rmp 1; KpVP-1	-	KL2	1	-	-
GCA_003573775.1	New Zealand	Oceania	ST86	-	iro 1	rmp 1; KpVP-1	-	KL2	1	-	-
GCA_003573795.1	New Zealand	Oceania	ST2843	iuc 3	-	-	-	KL114	0	-	-
GCA_003666705.1	China	East Asia	ST11	iuc 1	-	-	rmpA2_6-60%	unknown (KL64)	1	CTX-M-147*	KPC-2
GCA_003666725.1	China	East Asia	ST11	iuc 1	iro 1	rmp 1; KpVP-1 (truncated)	rmpA2_3-47%	KL64	1	CTX-M-65;SHV-12	KPC-2
GCA_003666735.1	China	East Asia	ST11	iuc 1	-	-	rmpA2_2-54%	KL47	1	CTX-M-14^	KPC-2
GCA_003666765.1	China	East Asia	ST11	iuc 1	-	-	rmpA2_9	KL47	1	CTX-M-14^	KPC-2
GCA_003666785.1	China	East Asia	ST11	iuc 1	-	-	rmpA2_9	KL47	1	-	KPC-2
GCA_003666795.1	China	East Asia	ST11	iuc 1	-	-	rmpA2_9	KL47	1	-	KPC-2
GCA_003666825.1	China	East Asia	ST11	iuc 1	-	-	rmpA2_9	KL47	0	-	KPC-2
GCA_003666835.1	China	East Asia	ST11	iuc 1	-	-	rmpA2_9	KL47	1	-	KPC-2
GCA_003666845.1	China	East Asia	ST11	iuc 1	-	rmp 1; KpVP-1,-	rmpA2_3-47%	KL64	1	CTX-M-65	KPC-2
GCA_003830175.1	Thailand	Southeast Asia	ST43	iuc 3	-	-	-	KL61	0	-	-
GCA_003830195.1	Thailand	Southeast Asia	ST43	iuc 3	-	-	-	KL61	0	-	-
GCA_003830235.1	Thailand	Southeast Asia	ST43	iuc 3	-	-	-	KL61	0	-	-
GCA_003830245.1	Thailand	Southeast Asia	ST43	iuc 3	-	-	-	KL61	0	-	-
GCA_003830255.1	Thailand	Southeast Asia	ST43	iuc 3	-	-	-	KL61	0	-	-
GCA_003830485.1	Thailand	Southeast Asia	ST43	iuc 3	-	-	-	KL61	0	-	-
GCA_003830495.1	Thailand	Southeast Asia	ST43	iuc 3	-	-	-	KL61	0	-	-
GCA_003830535.1	Thailand	Southeast Asia	ST43	iuc 3	-	-	-	KL61	0	-	-
GCA_003830545.1	Thailand	Southeast Asia	ST43	iuc 3	-	-	-	KL61	0	-	-
GCA_003830575.1	Thailand	Southeast Asia	ST43	iuc 3	-	-	-	KL61	0	-	-
GCA_003830585.1	Thailand	Southeast Asia	ST43	iuc 3	-	-	-	KL61	0	-	-
GCA_003830595.1	Thailand	Southeast Asia	ST43	iuc 3 (truncated)	-	-	-	KL61	0	-	-
GCA_003830605.1	Thailand	Southeast Asia	ST43	iuc 3	-	-	-	KL61	0	-	-
GCA_003830645.1	Thailand	Southeast Asia	ST43	iuc 3	-	-	-	KL61	0	-	-
GCA_003830675.1	Thailand	Southeast Asia	ST43	iuc 3	-	-	-	KL61	0	-	-
GCA_003830695.1	Thailand	Southeast Asia	ST43	iuc 3	-	-	-	KL61	0	-	-
GCA_003830715.1	Thailand	Southeast Asia	ST43	iuc 3	-	-	-	KL61	0	-	-
GCA_003855315.1	Norway	Europe	ST15	iuc 1	-	-	rmpA2_8*-60%	KL24	0	CTX-M-15;CTX-M-15;SHV-5	-
GCA_003855515.1	China	East Asia	ST23	iuc 1	iro 1	rmp 1; KpVP-1	rmpA2_3-47%	KL1	1	CTX-M-15	VIM-1
GCA_003856475.1	China	East Asia	ST11	iuc 1	-	rmp 1; KpVP-1	rmpA2_3-47%	KL64	1	SHV-12;SHV-12	KPC-2
GCA_003858555.1	China	East Asia	ST15	iuc 1	-	-	rmpA2_9	KL112	1	CTX-M-15;CTX-M-15	OXA-232
GCA_003932915.1	China	East Asia	ST65	iuc 1	iro 1	rmp 1; KpVP-1 (truncated)	rmpA2_6*-47%	KL2	0.8407	-	KPC-2
GCA_003936465.1	Pakistan	South Asia	ST231	iuc 5	-	-	-	KL51	0	-	OXA-232
GCA_003936475.1	Pakistan	South Asia	ST231	iuc 5	-	-	-	KL51	0	-	OXA-232
GCA_003937035.1	Pakistan	South Asia	ST231	iuc 5	-	-	-	KL51	0	-	OXA-232
GCA_003937065.1	Pakistan	South Asia	ST231	iuc 5	-	-	-	KL51	0	-	OXA-232
GCA_003937205.1	Pakistan	South Asia	ST231	iuc 5	-	-	-	KL51	0	SHV-12	OXA-232
GCA_003937535.1	Pakistan	South Asia	ST231	iuc 5	-	-	-	KL51	0	-	OXA-232
GCA_003937565.1	Pakistan	South Asia	ST231	iuc 5	-	-	-	unknown (KL51)	0	-	OXA-232
GCA_003953905.1	China	East Asia	ST23	iuc 1	iro 1	rmp 1; KpVP-1	rmpA2_6-60%	KL1	0.5432	CTX-M-24	-
GCA_003977815.1	China	East Asia	ST2922	iuc 1 (incomplete)	iro 1 (incomplete)	rmp 1; KpVP-1 (incomplete)	-	KL1	1	CTX-M-14	-
GCA_004118955.1	China	East Asia	ST23	iuc 1	iro 1	rmp 1; KpVP-1	rmpA2_5-54%	KL1	1	-	-
GCA_004120155.1	China	East Asia	ST3685	iuc 1	iro 1	rmp 1; KpVP-1 (truncated)	rmpA2_5-54%	KL64	1	-	-
GCA_004127345.1	China	East Asia	ST147	iuc 5	iro 5	-	-	unknown (KL81)	0	CTX-M-3	NDM-5
GCA_004127715.1	China	East Asia	ST147	iuc 5	iro 5	-	-	KL81	0	CTX-M-3	NDM-5
GCA_004295405.1	India	South Asia	ST23	iuc 1 (truncated)	iro 1	rmp unknown	rmpA2_8*-53%	KL1	1	CTX-M-15;CTX-M-15	OXA-232
GCA_004307255.1	Japan	East Asia	ST36	iuc 1	iro 1	rmp 1; KpVP-1	rmpA2_6*-47%	KL62	1	-	-
GCA_004310675.1	Russia	Europe	ST147	iuc 1	-	-	-	KL10	1	CTX-M-15	OXA-48
GCA_004310885.1	Japan	East Asia	ST36	iuc 1	iro 1	rmp 1; KpVP-1	rmpA2_6*-47%	KL62	1	-	-
GCA_004310945.1	Japan	East Asia	ST23	-	iro 1	rmp 1; KpVP-1	-	KL1	0	-	-
GCA_004311025.1	Japan	East Asia	ST36	iuc 1	iro 1	rmp 1; KpVP-1	rmpA2_4*-47%	KL62	1	-	-
GCA_004311105.1	Japan	East Asia	ST412	iuc 1	iro 1	rmp 1; KpVP-1,-	rmpA2_8*	KL57	1	-	-
GCA_004311185.1	Japan	East Asia	ST218	iuc 1	iro 1	rmp 1; KpVP-1,-	rmpA2_8-60%	KL57	1	-	-
GCA_004311305.1	Japan	East Asia	ST86	iuc 1	iro 1	rmp 1; KpVP-1	-	KL2	1	-	-
GCA_004311445.1	Japan	East Asia	ST23	iuc 1	iro 1	rmp 1; KpVP-1,-	rmpA2_5-54%	KL1	1	-	-
GCA_004311565.1	Japan	East Asia	ST23	iuc 1	iro 1	rmp 1; KpVP-1,-	rmpA2_5-54%	KL1	1	-	-
GCA_004311665.1	Japan	East Asia	ST23	iuc 1	iro 1	rmp 1; KpVP-1,-	rmpA2_6-60%	KL1	1	-	-
GCA_004311965.1	Japan	East Asia	ST23	iuc 1	iro 1	rmp 1; KpVP-1,-	rmpA2_5*-54%	KL1	1	-	-
GCA_004312025.1	Japan	East Asia	ST218	iuc 1	iro 1	rmp 1; KpVP-1,-	rmpA2_8-60%	KL57	1	-	-
GCA_004312085.1	Japan	East Asia	ST29	iuc 1	iro 1	rmp 1; KpVP-1,-	rmpA2_8-60%	KL54	1	-	-
GCA_004312465.1	Japan	East Asia	ST1266	-	iro 3 (truncated)	rmp 3; ICEKp1	-	KL35	0	-	-
GCA_004312585.1	Japan	East Asia	ST65	iuc 1	iro 1	rmp 1; KpVP-1 (truncated),-	rmpA2_6*-47%	KL2	1	-	-
GCA_004312645.1	Japan	East Asia	ST86	iuc 1	iro 1	rmp 1; KpVP-1	-	KL2	1	-	-
GCA_004312805.1	Japan	East Asia	ST218	iuc 1	iro 1	rmp 1; KpVP-1,-	rmpA2_8-60%	KL57	1	-	-
GCA_004312925.1	Japan	East Asia	ST65	iuc 1	iro 1	rmp 1; KpVP-1 (truncated),-	rmpA2_6*-60%	KL2	1	-	-
GCA_004313025.1	Japan	East Asia	ST86	iuc 1	iro 1	rmp 1; KpVP-1	-	KL2	1	-	-
GCA_004313265.1	Japan	East Asia	ST268	iuc 1	iro 1	rmp 1; KpVP-1	rmpA2_8*	KL20	1	CTX-M-2	-
GCA_004313325.1	Japan	East Asia	ST36	iuc 1	iro 1	rmp 1; KpVP-1 (truncated),-	rmpA2_2-54%	KL62	1	-	-
GCA_004313365.1	Japan	East Asia	ST268	iuc 1	iro 1	rmp 1; KpVP-1 (truncated),-	rmpA2_2*-47%	KL20	1	-	-
GCA_004313465.1	Japan	East Asia	ST23	iuc 1	iro 1	rmp 1; KpVP-1,-	rmpA2_6-60%	KL1	1	-	-
GCA_004313585.1	Japan	East Asia	ST86	iuc 1	iro 1	rmp 1; KpVP-1	-	KL2	1	-	-
GCA_004332075.1	Canada	North America	ST86	iuc 1	iro 1	rmp 1; KpVP-1	rmpA2_2*-46%	KL2	1	-	KPC-2
GCA_004332095.1	China	East Asia	ST11	iuc 1	-	rmp 1; KpVP-1	rmpA2_3-47%	KL64	1	CTX-M-65;SHV-12	KPC-2
GCA_004353165.1	China	East Asia	ST375	iuc 1	iro 1	rmp 1; KpVP-1	-	KL2	0	-	-
GCA_004357805.1	China	East Asia	ST307	iuc 1	-	-	rmpA2_3-47%	KL102	1	CTX-M-15	OXA-48
GCA_004357815.1	China	East Asia	ST307	iuc 1	-	-	rmpA2_3-47%	KL102	1	CTX-M-15	OXA-48
GCA_004830505.1	Thailand	Southeast Asia	ST231	iuc 5	-	-	-	KL51	0	-	OXA-232
GCA_004831115.1	Thailand	Southeast Asia	ST231	iuc 5	-	-	-	KL51	0	CTX-M-15	OXA-232
GCA_004831155.1	Thailand	Southeast Asia	ST231	iuc 5	-	-	-	KL51	0	-	OXA-232
GCA_004831225.1	Thailand	Southeast Asia	ST231	iuc 5	-	-	-	KL51	0	-	OXA-232
GCA_004831325.1	Thailand	Southeast Asia	ST231	iuc 5	-	-	-	KL51	0	-	OXA-232
GCA_004831365.1	Thailand	Southeast Asia	ST231	iuc 5	-	-	-	KL51	0	-	OXA-232
GCA_004833595.1	Thailand	Southeast Asia	ST231	iuc 5	-	-	-	KL51	0	-	OXA-232
GCA_004833705.1	Thailand	Southeast Asia	ST231	iuc 5	-	-	-	KL51	0	-	OXA-232
GCA_004833925.1	Thailand	Southeast Asia	ST231	iuc 5	-	-	-	KL51	0	-	OXA-232
GCA_004833935.1	Thailand	Southeast Asia	ST231	iuc 5	-	-	-	KL51	0	-	OXA-232
GCA_004924315.1	USA	North America	ST23	iuc 1	iro 1	rmp 1; KpVP-1	rmpA2_3-47%	KL1	1	-	KPC-2
GCA_005503795.1	China	East Asia	ST290	iuc 3	-	-	-	KL21	0	-	NDM-5
GCA_005503805.1	China	East Asia	ST290	iuc 3	-	-	-	KL21	0	-	NDM-5
GCA_005503815.1	China	East Asia	ST290	iuc 3	-	-	-	KL21	0	-	NDM-5
GCA_005503855.1	China	East Asia	ST290	iuc 3	-	-	-	KL21	0	-	NDM-5
GCA_005503985.1	China	East Asia	ST11	iuc 1	-	rmp 1; KpVP-1,-	rmpA2_3-47%	KL64	1	CTX-M-65	KPC-2
GCA_005504005.1	China	East Asia	ST11	iuc 1	-	rmp 1; KpVP-1,-	rmpA2_3-47%	KL64	1	CTX-M-65	KPC-2
GCA_005504055.1	China	East Asia	ST11	iuc 1	-	rmp 1; KpVP-1,-	rmpA2_3-47%	KL64	1	CTX-M-65;SHV-12	KPC-2
GCA_005504085.1	China	East Asia	ST11	iuc 1	-	rmp 1; KpVP-1,-	rmpA2_3-47%	KL64	1	CTX-M-65;SHV-12	KPC-2
GCA_005504095.1	China	East Asia	ST11	iuc 1	-	rmp 1; KpVP-1,-	rmpA2_3-47%	KL64	1	CTX-M-65	KPC-2
GCA_005504165.1	China	East Asia	ST290	iuc 3	-	-	-	KL21	0	-	NDM-5
GCA_005504185.1	China	East Asia	ST11	iuc 1	-	rmp 1; KpVP-1,-	rmpA2_3-47%	KL64	1	-	KPC-2;NDM-5
GCA_005504235.1	China	East Asia	ST11	iuc 1	-	rmp 1; KpVP-1 (truncated),-	rmpA2_3-47%	KL64	0	-	KPC-2
GCA_005504295.1	China	East Asia	ST11	iuc 1	-	-	rmpA2_3-47%	KL64	1	CTX-M-65	KPC-2
GCA_005504305.1	China	East Asia	ST11	iuc 1	-	rmp 1; KpVP-1,-	rmpA2_3-47%	KL64	1	CTX-M-65;SHV-12	KPC-2
GCA_005504315.1	China	East Asia	ST290	iuc 3	-	-	-	KL21	0	-	NDM-5
GCA_005504355.1	China	East Asia	ST11	iuc 1	-	-	rmpA2_9	KL47	1	CTX-M-14^	-
GCA_005504365.1	China	East Asia	ST11	iuc 1	-	rmp 1; KpVP-1,-	rmpA2_3-47%	KL64	1	CTX-M-65;SHV-12	KPC-2
GCA_005853785.1	China	East Asia	ST11	iuc 1	-	-	rmpA2_9	unknown (KL47)	1	CTX-M-65	KPC-2
GCA_005854025.1	China	East Asia	ST11	iuc 1	-	-	rmpA2_2*-54%	unknown (KL47)	1	CTX-M-65	KPC-2
GCA_005854245.1	China	East Asia	ST11	iuc 1	-	-	rmpA2_9	unknown (KL47)	1	CTX-M-65	KPC-2
GCA_005885775.1	United Kingdom	Europe	ST15	iuc 1 (truncated)	-	-	rmpA2_9	KL112	1	CTX-M-15	NDM-1
GCA_005944305.1	United Kingdom	Europe	ST147	iuc 1 (truncated)	-	rmp 1; KpVP-1	rmpA2_6*-47%	KL64	1	CTX-M-15	NDM-1
GCA_006130105.1	China	East Asia	ST65	iuc 1	iro 1	rmp 1; KpVP-1 (truncated),-	rmpA2_6-60%	KL2	1	-	KPC-2
GCA_006130515.1	China	East Asia	ST268	iuc 1	iro 1	rmp 1; KpVP-1,-	rmpA2_8*	KL20	0.7184	CTX-M-15	KPC-2
GCA_006131215.1	China	East Asia	ST23-1LV	iuc 1	iro 1	rmp 1; KpVP-1,-	rmpA2_8-60%	KL1	1	CTX-M-15	KPC-2
GCA_006131335.1	China	East Asia	ST86	iuc 1	iro 1	rmp 1; KpVP-1,-	rmpA2_4-34%	KL2	1	-	KPC-2
GCA_006131345.1	China	East Asia	ST268	iuc 1	iro 1	rmp 1; KpVP-1,-	rmpA2_8*	KL20	0.7184	CTX-M-15	KPC-2
GCA_006304565.1	China	East Asia	ST11	iuc 1	-	-	rmpA2_3-47%	KL64	1	CTX-M-65;SHV-12	KPC-2
GCA_006349165.1	China	East Asia	ST15	iuc 1	-	-	rmpA2_9	KL112	1	CTX-M-15	OXA-232
GCA_006349175.1	China	East Asia	ST15	iuc 1	-	-	rmpA2_9	KL112	1	CTX-M-15	OXA-232
GCA_006349195.1	China	East Asia	ST15	iuc 1	-	-	rmpA2_9	KL112	1	CTX-M-15	OXA-232
GCA_006349205.1	China	East Asia	ST15	iuc 1	-	-	rmpA2_9	KL112	0	CTX-M-15	OXA-232
GCA_006349225.1	China	East Asia	ST15	iuc 1	-	-	rmpA2_9	KL112	1	CTX-M-15	OXA-232
GCA_006349245.1	China	East Asia	ST15	iuc 1	-	-	rmpA2_9	KL112	1	CTX-M-15	OXA-232
GCA_006349275.1	China	East Asia	ST15	iuc 1	-	-	rmpA2_9	KL112	1	CTX-M-15	OXA-232
GCA_006349315.1	China	East Asia	ST15	iuc 1	-	-	rmpA2_9	KL112	1	CTX-M-15	OXA-232
GCA_006494895.1	China	East Asia	ST11	iuc 1	-	rmp 1; KpVP-1	rmpA2_3-47%	KL64	1	CTX-M-65;SHV-12	KPC-2
GCA_006494915.1	China	East Asia	ST11	iuc 1	-	-	rmpA2_9	KL47	1	CTX-M-65	KPC-2
GCA_006542115.2	France	Europe	ST23	iuc 1	iro 1	rmp 1; KpVP-1 (truncated)	rmpA2_6-60%	unknown (KL1)	1	-	-
GCA_006681765.1	China	East Asia	ST660	iuc 1	-	-	rmpA2_6-60%	KL16	1	SHV-5^	-
GCA_006965405.3	China	East Asia	ST35	-	iro 3 (truncated)	rmp 3; ICEKp1 (truncated)	-	KL108	0	CTX-M-15	-
GCA_007096915.1	Russia	Europe	ST147	iuc 1	-	-	-	KL10	1	CTX-M-15	OXA-48
GCA_007096935.1	Russia	Europe	ST23	iuc 1	iro 1	rmp 1; KpVP-1,-	rmpA2_6*-47%	KL1	1	-	-
GCA_007097025.1	Russia	Europe	ST23	iuc 1	iro 1	rmp 1; KpVP-1,-	rmpA2_5*-54%	KL1	1	-	-
GCA_007097045.1	Russia	Europe	ST23	iuc 1	iro 1	rmp 1; KpVP-1,-	rmpA2_5-54%	KL1	1	-	-
GCA_007115145.1	China	East Asia	ST11	iuc 1	iro 1	rmp 1; KpVP-1 (truncated),-	rmpA2_3-47%	KL64	1	CTX-M-65;SHV-12	KPC-2
GCA_007115205.1	China	East Asia	ST11	iuc 1	-	-	rmpA2_8-60%	KL47	1	CTX-M-65	KPC-2
GCA_007115215.1	China	East Asia	ST11	iuc 1	-	-	rmpA2_8-60%	KL47	1	CTX-M-65	KPC-2
GCA_007115235.1	China	East Asia	ST11	iuc 1	-	-	rmpA2_8-60%	KL47	1	CTX-M-65	KPC-2
GCA_007115275.1	China	East Asia	ST11	iuc 1	-	-	rmpA2_8-60%	KL47	1	CTX-M-65	KPC-2
GCA_007115325.1	China	East Asia	ST11	iuc 1	-	-	rmpA2_8-60%	KL47	1	CTX-M-65	KPC-2
GCA_007115355.1	China	East Asia	ST11	iuc 1	-	-	rmpA2_8-60%	KL47	1	CTX-M-65	KPC-2
GCA_007115365.1	China	East Asia	ST11	iuc 1	-	-	rmpA2_8-60%	unknown (KL47)	1	CTX-M-65	KPC-2
GCA_007115385.1	China	East Asia	ST11	iuc 1	-	-	rmpA2_8-60%	KL47	1	CTX-M-65	KPC-2
GCA_007115395.1	China	East Asia	ST11	iuc 1	iro 1	rmp 1; KpVP-1 (truncated),-	rmpA2_3-47%	KL64	1	CTX-M-65;SHV-12	KPC-2
GCA_007115435.1	China	East Asia	ST11	iuc 1	iro 1	rmp 1; KpVP-1 (truncated),-	rmpA2_3-47%	KL64	1	CTX-M-65;SHV-12	KPC-2
GCA_007115465.1	China	East Asia	ST11	iuc 1	iro 1	rmp 1; KpVP-1 (truncated),-	rmpA2_3-47%	KL64	1	CTX-M-65;SHV-12	KPC-2
GCA_007115475.1	China	East Asia	ST11	iuc 1	iro 1	rmp 1; KpVP-1 (truncated),-	rmpA2_3-47%	KL64	1	CTX-M-65;SHV-12	KPC-2
GCA_007115485.1	China	East Asia	ST11	iuc 1	iro 1	rmp 1; KpVP-1 (truncated),-	rmpA2_3-47%	KL64	1	CTX-M-65;SHV-12	KPC-2
GCA_007115515.1	China	East Asia	ST11	iuc 1	iro 1	rmp 1; KpVP-1 (truncated),-	rmpA2_3-47%	KL64	1	CTX-M-65;SHV-12	KPC-2
GCA_007115565.1	China	East Asia	ST11	iuc 1	-	rmp 1; KpVP-1 (truncated)	rmpA2_3-47%	KL64	1	CTX-M-65	KPC-2
GCA_007115575.1	China	East Asia	ST11	iuc 1	-	-	rmpA2_8-60%	unknown (KL47)	1	CTX-M-65	KPC-2
GCA_007115595.1	China	East Asia	ST11	iuc 1	-	-	rmpA2_8-60%	KL47	0	CTX-M-65	KPC-2
GCA_007954805.1	China	East Asia	ST11	iuc 1	-	rmp 1; KpVP-1,-	rmpA2_3-47%	KL64	1	CTX-M-65	KPC-2
GCA_007954815.1	China	East Asia	ST11	iuc 1	-	rmp 1; KpVP-1,-	rmpA2_3-47%	KL64	1	CTX-M-65	KPC-2
GCA_007954825.1	China	East Asia	ST11	iuc 1	-	rmp 1; KpVP-1,-	rmpA2_3-47%	KL64	1	CTX-M-65	KPC-2
GCA_007954845.1	China	East Asia	ST11	iuc 1	-	rmp 1; KpVP-1 (truncated),-	rmpA2_3-47%	KL64	1	CTX-M-65	KPC-2
GCA_007954905.1	China	East Asia	ST11	iuc 1	-	rmp 1; KpVP-1,-	rmpA2_3-47%	KL64	1	CTX-M-65	KPC-2
GCA_007954925.2	China	East Asia	ST11	iuc 1	-	-	rmpA2_3-47%	KL64	1	CTX-M-65;SHV-12	KPC-2
GCA_007954935.1	China	East Asia	ST11	iuc 1	-	-	rmpA2_3-47%	KL64	1	CTX-M-65	KPC-2
GCA_007954945.1	China	East Asia	ST11	iuc 1	-	rmp 1; KpVP-1,-	rmpA2_3-47%	KL64	1	CTX-M-65	KPC-2
GCA_007954995.1	China	East Asia	ST11	iuc 1	-	-	rmpA2_3-47%	KL64	1	CTX-M-65	KPC-2
GCA_007955015.2	China	East Asia	ST11	iuc 1	-	rmp 1; KpVP-1	rmpA2_3-47%	KL64	1	CTX-M-65;SHV-12	KPC-2
GCA_007955045.1	China	East Asia	ST11	iuc 1	-	rmp 1; KpVP-1,-	rmpA2_3-47%	KL64	1	CTX-M-65	KPC-2
GCA_007955055.1	China	East Asia	ST11	iuc 1	-	rmp 1; KpVP-1,-	rmpA2_3-47%	KL64	1	CTX-M-65	KPC-2
GCA_007955065.1	China	East Asia	ST11	iuc 1	-	rmp 1; KpVP-1,-	rmpA2_3-47%	KL64	1	CTX-M-65	KPC-2
GCA_007955095.1	China	East Asia	ST11	iuc 1	-	rmp 1; KpVP-1,-	rmpA2_3-47%	KL64	1	CTX-M-65	KPC-2
GCA_007955105.2	China	East Asia	ST11	iuc 1	-	rmp 1; KpVP-1	rmpA2_3-47%	KL64	1	CTX-M-65;SHV-12	KPC-2
GCA_007955155.1	China	East Asia	ST11	iuc 1	-	rmp 1; KpVP-1,-	rmpA2_3-47%	KL64	1	CTX-M-65	KPC-2
GCA_007955175.1	Russia	Europe	ST268	iuc 1,iuc 1	iro 1,iro 1	rmp 1; KpVP-1,rmp 1; KpVP-1,-,-	rmpA2_8*,rmpA2_8*	KL20	1	CTX-M-3;CTX-M-3	-
GCA_007955185.1	Russia	Europe	ST23	iuc 1,iuc 1	iro 1	rmp 1; KpVP-1,-,-	rmpA2_8-60%,rmpA2_8-60%	KL1	1	CTX-M-15;CTX-M-15	-
GCA_007955215.1	Russia	Europe	ST23	iuc 1,iuc 1	iro 1	rmp 1; KpVP-1,-,-	rmpA2_8-60%,rmpA2_8-60%	KL1	1	CTX-M-15	-
GCA_007955245.1	Russia	Europe	ST23	iuc 1,iuc 1	iro 1	rmp 1; KpVP-1,-,-	rmpA2_8-60%,rmpA2_8-60%	KL1	1	CTX-M-15	-
GCA_007955285.1	Russia	Europe	ST23	iuc 1,iuc 1	iro 1,iro 1	rmp 1; KpVP-1,rmp 1; KpVP-1,-,-	rmpA2_8-60%,rmpA2_8-60%	KL1	1	CTX-M-15;CTX-M-15	-
GCA_007955295.1	Russia	Europe	ST6558	-	-	-	-	KL39	0	-	-
GCA_007955345.1	Russia	Europe	ST23	iuc 1,iuc 1	iro 1	rmp 1; KpVP-1,-,-	rmpA2_5-54%,rmpA2_5-54%	KL1	1	-	-
GCA_007997445.1	China	East Asia	ST11	iuc 1	-	-	rmpA2_8-60%	unknown (KL47)	1	CTX-M-65	KPC-2
GCA_007997455.1	China	East Asia	ST11	iuc 1	-	-	rmpA2_8-60%	KL47	1	CTX-M-65	KPC-2
GCA_007997465.1	China	East Asia	ST11	iuc 1	-	-	rmpA2_8-60%	KL47	1	CTX-M-65	KPC-2
GCA_007997475.1	China	East Asia	ST11	iuc 1	-	-	rmpA2_8-60%	KL47	1	CTX-M-65	KPC-2
GCA_007997485.1	China	East Asia	ST11	iuc 1	-	-	rmpA2_8-60%	unknown (KL47)	1	CTX-M-65	KPC-2
GCA_007997545.1	China	East Asia	ST11	iuc 1	-	-	rmpA2_8-60%	KL47	1	CTX-M-65	KPC-2
GCA_007997555.1	China	East Asia	ST11	iuc 1	-	-	rmpA2_8-60%	KL47	1	CTX-M-65	KPC-2
GCA_007997575.1	China	East Asia	ST11	iuc 1	-	-	rmpA2_8-60%	KL47	1	CTX-M-65	KPC-2
GCA_007997605.1	China	East Asia	ST11	iuc 1	iro 1 (incomplete)	rmp 1; KpVP-1,-	rmpA2_3-47%	KL64	1	CTX-M-65	KPC-2
GCA_007997655.1	China	East Asia	ST11	iuc 1	iro 1	rmp 1; KpVP-1 (truncated),-	rmpA2_3-47%	KL64	1	CTX-M-65;SHV-12	KPC-2
GCA_007997665.1	China	East Asia	ST11	iuc 1	-	rmp 1; KpVP-1 (truncated)	rmpA2_3-47%	KL64	1	CTX-M-65	KPC-2
GCA_007997675.1	China	East Asia	ST11	iuc 1	iro 1	rmp 1; KpVP-1 (truncated),-	rmpA2_3-47%	KL64	1	CTX-M-65;SHV-12	KPC-2
GCA_007997705.1	China	East Asia	ST11	iuc 1	iro 1	rmp 1; KpVP-1 (truncated),-	rmpA2_3-47%	KL64	1	CTX-M-65;SHV-12	KPC-2
GCA_007997745.1	China	East Asia	ST11	iuc 1	iro 1	rmp 1; KpVP-1 (truncated),-	rmpA2_3-47%	KL64	1	CTX-M-65;SHV-12	KPC-2
GCA_007997755.1	China	East Asia	ST11	iuc 1 (incomplete)	iro 1	rmp 1; KpVP-1 (truncated),-	rmpA2_3-47%	KL64	1	CTX-M-65;SHV-12	KPC-2
GCA_007997765.1	China	East Asia	ST11	iuc 1	iro 1	rmp 1; KpVP-1 (truncated),-	rmpA2_3-47%	KL64	1	CTX-M-65;SHV-12	KPC-2
GCA_007997795.1	China	East Asia	ST11	iuc 1	iro 1	rmp 1; KpVP-1 (truncated),-	rmpA2_3-47%	KL64	1	CTX-M-65;SHV-12	KPC-2
GCA_007997815.1	China	East Asia	ST11	iuc 1	-	rmp 1; KpVP-1,-	rmpA2_3-47%	KL64	1	CTX-M-65	KPC-2
GCA_007997875.1	China	East Asia	ST11	iuc 1	-	-	rmpA2_8-60%	KL47	1	CTX-M-65	KPC-2
GCA_007997885.1	China	East Asia	ST11	iuc 1	-	rmp 1; KpVP-1 (truncated)	rmpA2_3-47%	KL64	1	CTX-M-65	KPC-2
GCA_007997915.1	China	East Asia	ST11	iuc 1	-	-	rmpA2_8-60%	KL47	1	CTX-M-65	KPC-2
GCA_007997945.1	China	East Asia	ST11	iuc 1	-	-	rmpA2_8-60%	unknown (KL47)	1	CTX-M-65	KPC-2
GCA_007997975.1	China	East Asia	ST11	iuc 1	-	-	rmpA2_8-60%	KL47	1	CTX-M-65	KPC-2
GCA_007997995.1	China	East Asia	ST11	iuc 1	-	-	rmpA2_8-60%	KL47	1	CTX-M-65	KPC-2
GCA_008087355.1	China	East Asia	ST660	iuc 1	iro 1	rmp 1; KpVP-1 (truncated),-	rmpA2_6-60%	KL16	1	TEM-116^	-
GCA_008087375.1	China	East Asia	ST660	iuc 1	-	-	rmpA2_6-60%	KL16	1	SHV-5^	-
GCA_008274175.1	Russia	Europe	ST23	iuc 1	iro 1	rmp 1; KpVP-1,-	rmpA2_5-54%	KL1	1	-	-
GCA_008274195.1	Russia	Europe	ST23	iuc 1	iro 1	rmp 1; KpVP-1,-	rmpA2_8-60%	unknown (KL1)	1	CTX-M-15	OXA-48
GCA_008320705.1	China	East Asia	ST29	iuc 1	iro 1	rmp 1; KpVP-1,-	rmpA2_8-60%	KL54	1	-	NDM-5
GCA_008374385.1	France	Europe	ST11	iuc 1	-	-	rmpA2_3-47%	unknown (KL107)	0	CTX-M-65	KPC-2
GCA_008374875.1	France	Europe	ST101	iuc 1	-	-	-	unknown (KL107)	1	-	KPC-2
GCA_008375045.1	France	Europe	ST11	iuc 1	-	-	-	unknown (KL107)	1	CTX-M-3;CTX-M-65	KPC-2
GCA_008572715.1	Singapore	Southeast Asia	ST65	iuc 1	iro 1	rmp 1; KpVP-1 (truncated),-	rmpA2_5-54%	KL2	1	-	KPC-2
GCA_008572725.1	Singapore	Southeast Asia	ST65	iuc 1	iro 1	rmp 1; KpVP-1 (truncated),-	rmpA2_6-60%	KL2	1	-	KPC-2
GCA_008572735.1	Singapore	Southeast Asia	ST65	iuc 1	iro 1	rmp 1; KpVP-1 (truncated)	rmpA2_6*-60%	unknown (KL2)	1	-	KPC-2
GCA_008572745.1	Singapore	Southeast Asia	ST65	iuc 1	iro 1	rmp 1; KpVP-1 (truncated),-	rmpA2_6-60%	KL2	1	-	KPC-2
GCA_008572755.1	Singapore	Southeast Asia	ST65	iuc 1	iro 1	rmp 1; KpVP-1 (truncated)	-	unknown (KL2)	1	-	KPC-2
GCA_008572815.1	Singapore	Southeast Asia	ST65	iuc 1	iro 1	rmp 1; KpVP-1 (truncated),-	rmpA2_6-60%	KL2	1	-	KPC-2
GCA_008572825.1	Singapore	Southeast Asia	ST65	iuc 1	iro 1	rmp 1; KpVP-1 (truncated),-	rmpA2_6-60%	KL2	1	-	KPC-2
GCA_008572835.1	Singapore	Southeast Asia	ST65	iuc 1	iro 1	rmp 1; KpVP-1 (truncated)	rmpA2_6-60%	KL2	1	-	KPC-2
GCA_008572845.1	Singapore	Southeast Asia	ST65	iuc 1	iro 1	rmp 1; KpVP-1 (truncated),-	rmpA2_6-60%	KL2	1	-	KPC-2
GCA_008572855.1	Singapore	Southeast Asia	ST86	iuc 1	-	rmp 1; KpVP-1 (incomplete)	-	KL2	1	-	KPC-2
GCA_008572915.1	Singapore	Southeast Asia	ST86	iuc 1	iro 1	rmp 1; KpVP-1 (truncated)	-	KL2	1	-	KPC-2
GCA_008572935.1	Singapore	Southeast Asia	ST893	iuc 1	iro 1	rmp 1; KpVP-1	rmpA2_8*	unknown (KL20)	1	CTX-M-15	KPC-2
GCA_008572945.1	Singapore	Southeast Asia	ST23	iuc 1	iro 1	rmp 1; KpVP-1 (truncated)	-	KL1	1	-	KPC-2
GCA_008572955.1	Singapore	Southeast Asia	ST420	iuc 1	iro 1	rmp 1; KpVP-1 (truncated)	rmpA2_5-54%	KL20	1	-	KPC-2
GCA_008572965.1	Singapore	Southeast Asia	ST23	iuc 1	iro 1	rmp 1; KpVP-1 (incomplete),-	rmpA2_5*-54%	KL1	1	-	KPC-2
GCA_008573005.1	Singapore	Southeast Asia	ST23	iuc 1	iro 1	rmp 1; KpVP-1 (truncated)	rmpA2_8*-19%	KL1	0	-	KPC-2
GCA_008573035.1	Singapore	Southeast Asia	ST23	iuc 1	iro 1	rmp 1; KpVP-1	rmpA2_6-60%	KL1	0	-	KPC-2
GCA_008573055.1	Singapore	Southeast Asia	ST23	iuc 1	iro 1	rmp 1; KpVP-1 (truncated)	rmpA2_6-60%	KL1	0	-	KPC-2
GCA_008630125.1	China	East Asia	ST25	iuc 3	-	-	-	KL2	0	SHV-12	NDM-1
GCA_008630175.1	China	East Asia	ST25	iuc 3	-	-	-	KL2	0	SHV-31^	NDM-1
GCA_008630195.1	China	East Asia	ST25	iuc 3	-	-	-	KL2	0	-	NDM-1
GCA_008630255.1	China	East Asia	ST25	iuc 3	-	-	-	KL2	0	-	NDM-1
GCA_008632765.1	China	East Asia	ST25	iuc 3	-	-	-	KL2	0	SHV-31^	NDM-1
GCA_008634545.1	China	East Asia	ST15	iuc 1	-	-	rmpA2_9	KL112	1	CTX-M-15	OXA-232
GCA_008634555.1	China	East Asia	ST15	iuc 1	-	-	rmpA2_9	KL112	1	CTX-M-15	OXA-232
GCA_008634565.1	China	East Asia	ST15	iuc 1	-	-	rmpA2_9	KL112	1	CTX-M-15	OXA-232
GCA_008634585.1	China	East Asia	ST15	iuc 1	-	-	rmpA2_9	KL112	1	CTX-M-15	OXA-232
GCA_008634595.1	China	East Asia	ST15	iuc 1	-	-	rmpA2_9	KL112	1	CTX-M-15	OXA-232
GCA_008634675.1	China	East Asia	ST15	iuc 1	-	-	rmpA2_9	KL112	1	CTX-M-15	OXA-232
GCA_008634705.1	China	East Asia	ST15	iuc 1	-	-	rmpA2_9*-34%	KL112	1	CTX-M-15	OXA-232
GCA_008634715.1	China	East Asia	ST15	iuc 1	-	-	rmpA2_9	KL112	1	CTX-M-15	OXA-232
GCA_008634725.1	China	East Asia	ST15	iuc 1	-	-	rmpA2_9	KL112	0	CTX-M-15	OXA-232
GCA_008634755.1	China	East Asia	ST15	iuc 1	-	-	rmpA2_9*-39%	KL112	1	CTX-M-15	OXA-232
GCA_008634795.1	China	East Asia	ST15	iuc 1	-	-	rmpA2_9	KL112	1	CTX-M-15	OXA-232
GCA_008728695.1	China	East Asia	ST11	iuc 1	-	rmp 1; KpVP-1	rmpA2_3-47%	KL64	1	CTX-M-65;SHV-12	KPC-2
GCA_008756805.1	China	East Asia	ST23	iuc 1	iro 1	rmp 1; KpVP-1,-	rmpA2_5-54%	KL1	1	-	-
GCA_008756815.1	China	East Asia	ST700	iuc 3	iro 3 (truncated)	rmp 3; ICEKp1	-	KL1	0	-	-
GCA_008756855.1	China	East Asia	ST23	iuc 1	iro 1	rmp 1; KpVP-1,-	rmpA2_3-47%	KL1	0	-	-
GCA_008756865.1	China	East Asia	ST23	iuc 1	iro 1	-	-	unknown (KL1)	1	-	-
GCA_008756885.1	China	East Asia	ST86	iuc 1	iro 1	rmp 1; KpVP-1,-	rmpA2_6-60%	KL2	1	-	-
GCA_008756915.1	China	East Asia	ST412	iuc 1	iro 1	rmp 1; KpVP-1,-	rmpA2_8*	KL57	1	-	-
GCA_008830445.1	China	East Asia	ST65	iuc 1	iro 1	rmp 1; KpVP-1 (truncated),-	rmpA2_6*-47%	KL2	1	-	-
GCA_008830485.1	China	East Asia	ST660	iuc 1	-	-	rmpA2_6*-47%	KL16	1	-	KPC-2
GCA_008830495.1	China	East Asia	ST268	iuc 1	iro 1	rmp 1; KpVP-1,-	rmpA2_8*	KL20	1	-	-
GCA_008830505.1	China	East Asia	ST23	iuc 1	iro 1	rmp 1; KpVP-1,-	rmpA2_6-60%	KL1	1	-	-
GCA_008830545.1	China	East Asia	ST86	iuc 1	iro 1	rmp 1; KpVP-1,-	rmpA2_9	KL2	1	-	-
GCA_008830555.1	China	East Asia	ST23	iuc 1	iro 1	rmp 1; KpVP-1,-	rmpA2_5-54%	KL1	1	-	-
GCA_008830585.1	China	East Asia	ST15	iuc 1	-	-	rmpA2_8-60%	KL24	1	-	KPC-2
GCA_008830595.1	China	East Asia	ST268	iuc 1	iro 1	rmp 1; KpVP-1,-	rmpA2_8*	KL20	1	-	KPC-2
GCA_008830605.1	China	East Asia	ST660	iuc 1	-	-	rmpA2_6*-55%	KL16	1	-	KPC-2
GCA_008830645.1	China	East Asia	ST1660	iuc 1	iro 1	rmp 1; KpVP-1,-	rmpA2_5*-54%	KL1	1	CTX-M-3	KPC-2
GCA_008830725.1	China	East Asia	ST15	iuc 1	-	-	rmpA2_8-60%	KL24	1	-	KPC-2
GCA_008867305.1	China	East Asia	ST11	iuc 1	-	-	rmpA2_8*	KL47	1	CTX-M-15;CTX-M-65	KPC-2
GCA_008867505.1	China	East Asia	ST11	iuc 1	-	rmp 1; KpVP-1,-	rmpA2_3-47%	KL64	1	CTX-M-65	KPC-2
GCA_009184885.1	Japan	East Asia	ST29	iuc 1	iro 1	rmp 1; KpVP-1,-	rmpA2_3-47%	KL54	1	-	-
GCA_009497695.1	China	East Asia	ST23	iuc 1	iro 1,iro 3	rmp 3; ICEKp1 (truncated),rmp 1; KpVP-1	rmpA2_3-47%	KL1	1	-	-
GCA_009497755.1	China	East Asia	ST1265	iuc 1	iro 1	rmp 1; KpVP-1	rmpA2_8-60%	KL1	1	-	KPC-2
GCA_009600585.1	South Korea	East Asia	ST147	iuc 3	-	-	-	KL81	0	-	-
GCA_009600615.1	South Korea	East Asia	ST147	iuc 3	-	-	-	KL81	0	-	-
GCA_009601745.1	USA	North America	ST5473-1LV	iuc 2A	iro unknown	rmp 2A; plasmid/chr (truncated)	-	unknown (KL20)	0	-	-
GCA_009646305.1	Romania	Europe	ST45	iuc 3	-	-	-	KL24	0	CTX-M-15	-
GCA_009661175.1	Russia	Europe	ST307	iuc 1	-	-	-	KL102	1	CTX-M-15	OXA-48
GCA_009661215.1	Russia	Europe	ST395	iuc 1	-	-	-	KL108	1	CTX-M-15	OXA-48
GCA_009661385.1	Russia	Europe	ST307	iuc 1	-	-	-	KL102	1	CTX-M-15	OXA-48
GCA_009661425.1	Russia	Europe	ST395	iuc 1	-	-	-	KL2	1	-	OXA-48
GCA_009661475.2	Russia	Europe	ST377	iuc 1	-	-	rmpA2_8*-59%	KL102	1	CTX-M-15	OXA-48
GCA_009661555.1	Russia	Europe	ST395	iuc 1	-	-	-	KL2	1	CTX-M-15	OXA-48
GCA_009661575.1	Russia	Europe	ST23	iuc 1	-	rmp unknown,-,-	rmpA2_8*	KL57	1	-	OXA-48
GCA_009661585.1	Russia	Europe	ST395	-	iro 1	rmp 1; KpVP-1 (truncated)	-	KL2	0	CTX-M-15	-
GCA_009661655.1	Russia	Europe	ST23	iuc 1	-	rmp unknown,-,-	rmpA2_8*	KL57	1	CTX-M-55	-
GCA_009661805.2	Russia	Europe	ST147	iuc 1	-	-	rmpA2_8*-41%	KL10	1	CTX-M-15	OXA-48
GCA_009684575.1	China	East Asia	ST11	iuc 1	-	rmp 1; KpVP-1	rmpA2_3-47%	KL64	1	CTX-M-65;SHV-12	KPC-2
GCA_009721355.1	China	East Asia	ST11	iuc 1	-	rmp 1; KpVP-1,-	rmpA2_3-47%	KL64	1	CTX-M-65	KPC-2
GCA_009721445.1	China	East Asia	ST11	iuc 1	-	rmp 1; KpVP-1,-	rmpA2_3-47%	KL64	1	CTX-M-65;SHV-129*?	KPC-2
GCA_009721455.1	China	East Asia	ST11	iuc 1	-	rmp 1; KpVP-1,-	rmpA2_3-47%	KL64	0.23	CTX-M-65	KPC-2
GCA_009721485.1	China	East Asia	ST11	iuc 1	-	-	rmpA2_9	KL47	1	CTX-M-14^	KPC-2
GCA_009721495.1	China	East Asia	ST11	iuc 1	-	-,-	rmpA2_3-47%	KL64	1	CTX-M-65	KPC-2
GCA_009721505.1	China	East Asia	ST11	iuc 1	-	rmp 1; KpVP-1,-	rmpA2_3-47%	KL64	1	CTX-M-65	KPC-2
GCA_009721545.1	China	East Asia	ST11	iuc 1	-	rmp 1; KpVP-1,-	rmpA2_3-47%	KL64	0.8871	CTX-M-65	KPC-2
GCA_009721555.1	China	East Asia	ST11	iuc 1	-	rmp unknown	rmpA2_3-47%	KL64	1	CTX-M-65	KPC-2
GCA_009721685.1	China	East Asia	ST11	iuc 1	iro 1	rmp 1; KpVP-1 (truncated),-	rmpA2_3-47%	KL64	1	CTX-M-65;SHV-12	KPC-2
GCA_009721705.1	China	East Asia	ST11	iuc 1	-	rmp 1; KpVP-1,-	rmpA2_3-47%	KL64	1	CTX-M-65	KPC-2
GCA_009721725.1	China	East Asia	ST11	iuc 1	-	-	rmpA2_9	unknown (KL47)	1	CTX-M-147*	KPC-2
GCA_009721735.1	China	East Asia	ST11	iuc 1	-	rmp 1; KpVP-1,-	rmpA2_3-47%	KL64	1	CTX-M-65;SHV-129*?	KPC-2
GCA_009721745.1	China	East Asia	ST11	iuc 1	-	-	rmpA2_3-47%	KL64	1	CTX-M-65	KPC-2
GCA_009721785.1	China	East Asia	ST11	iuc 1	iro 1	rmp 1; KpVP-1 (truncated),-	rmpA2_3-47%	KL64	1	CTX-M-65;SHV-12	KPC-2
GCA_009721805.1	China	East Asia	ST11	iuc 1	-	rmp 1; KpVP-1,-	rmpA2_3-47%	KL64	1	CTX-M-65	KPC-2
GCA_009721825.1	China	East Asia	ST11	iuc 1	-	rmp 1; KpVP-1,-	rmpA2_3-47%	KL64	1	CTX-M-65;SHV-12^	KPC-2
GCA_009721835.1	China	East Asia	ST11	iuc 1	-	rmp 1; KpVP-1,-	rmpA2_3-47%	KL64	1	CTX-M-65	KPC-2
GCA_009721845.1	China	East Asia	ST11	iuc 1	-	-	rmpA2_3-47%	KL64	1	CTX-M-65	KPC-2
GCA_009721875.1	China	East Asia	ST11	iuc 1	-	rmp 1; KpVP-1,-	rmpA2_3-47%	KL64	1	CTX-M-65	KPC-2
GCA_009721885.1	China	East Asia	ST11	iuc 1	-	rmp 1; KpVP-1,-	rmpA2_3-47%	KL64	1	CTX-M-65;SHV-12	KPC-2
GCA_009721925.1	China	East Asia	ST11	iuc 1	-	rmp 1; KpVP-1,-	rmpA2_3-47%	KL64	1	CTX-M-65	KPC-2
GCA_009721945.1	China	East Asia	ST11	iuc 1	-	rmp 1; KpVP-1,-	rmpA2_3-47%	KL64	1	CTX-M-65	KPC-2
GCA_009721965.1	China	East Asia	ST11	iuc 1	-	rmp 1; KpVP-1,-	rmpA2_3-47%	KL64	1	CTX-M-65	KPC-2
GCA_009721975.1	China	East Asia	ST11	iuc 1	iro 1	rmp 1; KpVP-1 (truncated),-	rmpA2_3-47%	KL64	1	SHV-12	KPC-2
GCA_009722005.1	China	East Asia	ST11	iuc 1	-	rmp 1; KpVP-1,-	rmpA2_3-47%	KL64	1	CTX-M-65	KPC-2
GCA_009722025.1	China	East Asia	ST11	iuc 1	-	rmp 1; KpVP-1,-	rmpA2_3-47%	KL64	1	CTX-M-65	KPC-2
GCA_009722035.1	China	East Asia	ST11	iuc 1	-	-	rmpA2_9	KL47	1	CTX-M-14^	KPC-2
GCA_009722045.1	China	East Asia	ST11	iuc 1	-	-	rmpA2_4*-47%	KL47	1	-	KPC-2
GCA_009722055.1	China	East Asia	ST11	iuc 1	-	rmp unknown	rmpA2_3-47%	KL64	1	CTX-M-65	KPC-2
GCA_009722105.1	China	East Asia	ST11	iuc 1	-	rmp 1; KpVP-1,-	rmpA2_3-47%	KL64	1	CTX-M-65	KPC-2
GCA_009722125.1	China	East Asia	ST11	iuc 1	-	rmp 1; KpVP-1,-	rmpA2_3-47%	KL64	1	CTX-M-65	KPC-2
GCA_009722135.1	China	East Asia	ST11	iuc 1	-	rmp 1; KpVP-1,-	rmpA2_3-47%	KL64	1	CTX-M-65	KPC-2
GCA_009722145.1	China	East Asia	ST11	iuc 1	iro 1	rmp 1; KpVP-1 (truncated),-	rmpA2_3-47%	KL64	1	CTX-M-65	KPC-2
GCA_009722165.1	China	East Asia	ST11	iuc 1	-	rmp 1; KpVP-1,-	rmpA2_3-47%	KL64	1	CTX-M-65	KPC-2
GCA_009722205.1	China	East Asia	ST11	iuc 1	-	rmp 1; KpVP-1,-	rmpA2_3-47%	KL64	1	CTX-M-65	KPC-2
GCA_009722215.1	China	East Asia	ST11	iuc 1	-	rmp 1; KpVP-1,-	rmpA2_3-47%	KL64	1	CTX-M-65	KPC-2
GCA_009722225.1	China	East Asia	ST11	iuc 1	-	rmp 1; KpVP-1 (truncated)	rmpA2_3-47%	KL64	1	CTX-M-65	KPC-2
GCA_009722265.1	China	East Asia	ST11	iuc 1	-	rmp 1; KpVP-1,-	rmpA2_3-47%	KL64	1	CTX-M-65	KPC-2
GCA_009722285.1	China	East Asia	ST11	iuc 1	-	rmp 1; KpVP-1,-	rmpA2_3-47%	KL64	1	CTX-M-65	KPC-2
GCA_009722305.1	China	East Asia	ST11	iuc 1	-	-	rmpA2_9	KL47	1	CTX-M-14^	KPC-2
GCA_009722315.1	China	East Asia	ST11	iuc 1	-	rmp 1; KpVP-1,-	rmpA2_3-47%	KL64	1	CTX-M-65;SHV-129*?	KPC-2
GCA_009722335.1	China	East Asia	ST11	iuc 1	-	rmp 1; KpVP-1,-	rmpA2_3-47%	KL64	1	CTX-M-65	KPC-2
GCA_009722365.1	China	East Asia	ST11	iuc 1	-	rmp 1; KpVP-1,-	rmpA2_3-47%	KL64	1	CTX-M-65;SHV-12	KPC-2
GCA_009722385.1	China	East Asia	ST11	iuc 1	-	rmp 1; KpVP-1,-	rmpA2_3-47%	KL64	1	CTX-M-65;SHV-12	KPC-2
GCA_009722425.1	China	East Asia	ST11	iuc 1	-	-	rmpA2_2-54%	KL47	1	CTX-M-65	KPC-2
GCA_009722515.1	China	East Asia	ST11	iuc 1	-	rmp 1; KpVP-1,-	rmpA2_3-47%	KL64	1	CTX-M-65	KPC-2
GCA_009722535.1	China	East Asia	ST11	iuc 1	-	-	rmpA2_6-60%	unknown (KL64)	1	CTX-M-147*	KPC-2
GCA_009722585.1	China	East Asia	ST11	iuc 1	iro 1	rmp 1; KpVP-1 (truncated)	rmpA2_3-47%	KL64	1	CTX-M-65;SHV-12	KPC-2
GCA_009722845.1	China	East Asia	ST11	iuc 5	-	-	-	KL64	0	CTX-M-65	KPC-2
GCA_009722875.1	China	East Asia	ST11	iuc 5	-	-	-	KL64	0	CTX-M-65	KPC-2
GCA_009723315.1	China	East Asia	ST11	iuc 1	-	-	rmpA2_2-54%	KL47	1	CTX-M-14^	KPC-2
GCA_009723345.1	China	East Asia	ST11	iuc 1	-	-	rmpA2_2*-54%	KL47	1	-	KPC-2
GCA_009723505.1	China	East Asia	ST11	iuc 1	-	-	rmpA2_2-54%	KL47	1	-	KPC-2
GCA_009723605.1	China	East Asia	ST11	iuc 1	-	-	rmpA2_9	KL47	1	-	KPC-2
GCA_009723615.1	China	East Asia	ST11	iuc 1	-	-	rmpA2_9	KL47	1	-	KPC-2
GCA_009723625.1	China	East Asia	ST11	iuc 1	-	-	rmpA2_9	KL47	1	CTX-M-14^	KPC-2
GCA_009723645.1	China	East Asia	ST11	iuc 1	-	-	rmpA2_9	KL47	1	CTX-M-9*	KPC-2
GCA_009723685.1	China	East Asia	ST11	iuc 1	-	-	rmpA2_9	KL47	1	CTX-M-14^	KPC-2
GCA_009723745.1	China	East Asia	ST11	iuc 1	-	-	rmpA2_9	KL47	1	CTX-M-14^	KPC-2
GCA_009723765.1	China	East Asia	ST11	iuc 1	-	-	rmpA2_9	KL47	1	-	KPC-2
GCA_009723875.1	China	East Asia	ST11	iuc 1	-	-	rmpA2_9	KL47	0	CTX-M-14^	KPC-2
GCA_009723905.1	China	East Asia	ST11	iuc 1	-	-	rmpA2_9	KL47	1	-	KPC-2
GCA_009723935.1	China	East Asia	ST11	iuc 1	-	-	rmpA2_9*-31%	KL47	1	-	KPC-2
GCA_009723965.1	China	East Asia	ST11	iuc 1	-	-	-	KL47	1	-	KPC-2
GCA_009723975.1	China	East Asia	ST11	iuc 1	-	-	rmpA2_9	KL47	1	-	KPC-2
GCA_009723985.1	China	East Asia	ST11	iuc 1	-	-	rmpA2_9	KL47	1	CTX-M-14^	KPC-2
GCA_009724025.1	China	East Asia	ST11	iuc 1	-	-	rmpA2_9	KL47	1	-	KPC-2
GCA_009724035.1	China	East Asia	ST11	iuc 1	-	-	rmpA2_9	KL47	1	CTX-M-65	KPC-2
GCA_009724065.1	China	East Asia	ST11	iuc 1	-	-	rmpA2_9*-54%	KL47	1	-	KPC-2
GCA_009724075.1	China	East Asia	ST11	iuc 1	-	-	rmpA2_9	KL47	1	-	KPC-2
GCA_009724085.1	China	East Asia	ST11	iuc 1	-	-	rmpA2_9	KL47	1	-	KPC-2
GCA_009724265.1	China	East Asia	ST11	iuc 1	-	rmp 1; KpVP-1,-	rmpA2_3-47%	KL64	1	CTX-M-65	KPC-2
GCA_009724285.1	China	East Asia	ST11	iuc 1	-	rmp 1; KpVP-1 (incomplete),-,-	rmpA2_3-47%	KL64	1	CTX-M-65	KPC-2
GCA_009724305.1	China	East Asia	ST11	iuc 1	-	rmp 1; KpVP-1,-	rmpA2_3-47%	KL64	1	CTX-M-65	KPC-2
GCA_009724365.1	China	East Asia	ST11	iuc 1	-	rmp 1; KpVP-1,-	rmpA2_3-47%	KL64	1	CTX-M-65	KPC-2
GCA_009724385.1	China	East Asia	ST11	iuc 1	-	rmp 1; KpVP-1,-	rmpA2_3-47%	KL64	0	CTX-M-65	KPC-2
GCA_009724395.1	China	East Asia	ST11	iuc 1	-	-	rmpA2_9	KL47	1	CTX-M-14^	KPC-2
GCA_009724565.1	China	East Asia	ST11	iuc 1	-	-	rmpA2_9	KL47	1	-	KPC-2
GCA_009724585.1	China	East Asia	ST11	iuc 1	-	rmp 1; KpVP-1,-	rmpA2_3-47%	KL64	1	CTX-M-65	KPC-2
GCA_009724595.1	China	East Asia	ST11	iuc 1	-	rmp 1; KpVP-1,-	rmpA2_3-47%	KL64	1	CTX-M-65	KPC-2
GCA_009797685.1	China	East Asia	ST11	iuc 1	-	-	rmpA2_8*-60%	unknown (KL107)	1	-	KPC-2
GCA_009797695.1	China	East Asia	ST11	-,-	-	-	rmpA2_8*-60%	KL47	1	KPC-52	-
GCA_009797705.1	China	East Asia	ST11	iuc 1	-	-	rmpA2_8*-60%	KL47	1	-	-
GCA_009797725.1	China	East Asia	ST11	iuc 3,iuc 1	-	-	rmpA2_8*-60%	unknown (KL47)	1	SHV-12	KPC-2
GCA_009797815.1	China	East Asia	ST11	iuc 1	-	-	rmpA2_6*-47%	KL47	1	CTX-M-65;KPC-51;SHV-12	-
GCA_009797845.1	China	East Asia	ST11	iuc 1	-	-	rmpA2_6*-55%	KL47	1	CTX-M-65;SHV-12	KPC-2
GCA_009807065.1	China	East Asia	ST11	iuc 1	-	rmp 1; KpVP-1,-	rmpA2_3-47%	KL64	1	CTX-M-65	KPC-2
GCA_009811915.1	China	East Asia	ST11	iuc 1	-	-,-,rmp 1; KpVP-1 (incomplete)	rmpA2_3-47%	KL64	1	CTX-M-65	KPC-2
GCA_009811925.1	China	East Asia	ST11	iuc 1	-	rmp 1; KpVP-1,-	rmpA2_3-47%	KL64	1	CTX-M-65	KPC-2
GCA_009811945.1	China	East Asia	ST11	iuc 1	-	rmp 1; KpVP-1,-	rmpA2_3-47%	KL64	1	CTX-M-65	KPC-2
GCA_009811995.1	China	East Asia	ST11	iuc 1	-	rmp 1; KpVP-1,-	rmpA2_3-47%	KL64	1	CTX-M-65	KPC-2
GCA_009812025.1	China	East Asia	ST11	iuc 1	-	rmp 1; KpVP-1,-	rmpA2_3-47%	KL64	1	-	KPC-2
GCA_009833945.1	China	East Asia	ST11	iuc 1	-	-	rmpA2_8-60%	unknown (KL47)	1	CTX-M-65;SHV-12	KPC-2
GCA_009834285.1	China	East Asia	ST11	iuc 1	-	rmp 1; KpVP-1 (truncated)	rmpA2_3-47%	KL64	1	CTX-M-65	KPC-2
GCA_009834965.1	Japan	East Asia	ST65	iuc 1	iro 1	rmp 1; KpVP-1 (truncated),-	rmpA2_6-60%	KL2	1	-	-
GCA_009848365.1	China	East Asia	ST37	iuc 3	-	-	-	KL25	0	CTX-M-3	-
GCA_009856585.1	China	East Asia	ST11	iuc 1	-	rmp 1; KpVP-1	rmpA2_3-47%	KL64	1	CTX-M-65;SHV-12	KPC-2
GCA_009884415.1	China	East Asia	ST15	iuc 1	-	-	rmpA2_9	KL112	1	CTX-M-15;CTX-M-15	OXA-232
GCA_009885015.1	China	East Asia	ST76	iuc 3	iro 3 (truncated)	rmp 3; ICEKp1	-	KL5	0	-	OXA-232
GCA_009885025.1	China	East Asia	ST76	iuc 3	iro 3 (truncated)	rmp 3; ICEKp1	-	KL5	0	-	-
GCA_009887895.1	Ukraine	Europe	ST23	iuc 1	iro 1	rmp 1; KpVP-1,-	rmpA2_6*-47%	KL1	1	-	-
GCA_009888105.1	Ukraine	Europe	ST392	iuc 1	-	-	-	KL27	1	CTX-M-15	OXA-48
GCA_009896515.1	China	East Asia	ST11	iuc 1	-	rmp 1; KpVP-1,-	rmpA2_3-47%	unknown (KL107)	1	-	KPC-2
GCA_009902145.1	China	East Asia	ST15	iuc 1	-	-	rmpA2_8-60%	KL24	1	-	KPC-2
GCA_009902265.1	China	East Asia	ST11	iuc 5	-	-	-	KL47	0	CTX-M-65	KPC-2
GCA_009909305.1	South Korea	East Asia	ST23	iuc 1	iro 1	rmp 1; KpVP-1	rmpA2_6-60%	KL1	1	-	-
GCA_009909325.1	South Korea	East Asia	ST23	iuc 1	iro 1	rmp 1; KpVP-1	rmpA2_6-60%	KL1	1	-	-
GCA_009930975.1	China	East Asia	ST11	iuc 1	-	-	rmpA2_8-60%	KL47	1	CTX-M-3	KPC-2
GCA_009931035.1	China	East Asia	ST290	iuc 3	-	-	-	KL21	0	-	NDM-1
GCA_009931055.1	China	East Asia	ST412	iuc 1	iro 1	rmp 1; KpVP-1 (truncated)	rmpA2_8*	KL57	1	-	-
GCA_009931075.1	China	East Asia	ST86	iuc 1	iro 1	rmp 1; KpVP-1	rmpA2_6-60%	KL2	1	-	-
GCA_009931175.1	China	East Asia	ST412	iuc 1	iro 1	rmp 1; KpVP-1 (truncated)	rmpA2_8*	KL57	1	-	-
GCA_009935695.1	China	East Asia	ST1660	iuc 1	iro 1	rmp 1; KpVP-1 (truncated)	rmpA2_5*-54%	KL1	1	CTX-M-3	KPC-2
GCA_009935715.1	China	East Asia	ST23	iuc 1	iro 1	rmp 1; KpVP-1 (truncated),-	rmpA2_3-47%	KL1	1	-	KPC-2
GCA_010590105.1	USA	North America	ST412	-	iro 1	rmp 1; KpVP-1	-	KL57	0	-	-
GCA_010590125.1	USA	North America	ST412	-	iro 1	rmp 1; KpVP-1	-	KL57	0	-	-
GCA_010590705.1	USA	North America	ST380	iuc 2	iro 2 (truncated)	rmp 2; KpVP-2	-	KL2	0	-	-
GCA_010591245.1	USA	North America	ST23	iuc 1	iro 1	rmp 1; KpVP-1 (truncated)	-	KL1	1	-	-
GCA_010592725.1	USA	North America	ST86	iuc 1	iro 1	rmp 1; KpVP-1	-	KL2	1	-	-
GCA_010598135.1	USA	North America	ST23	iuc 1	iro 1	-	-	unknown (KL1)	0	-	-
GCA_010602425.1	USA	North America	ST23	iuc 1	iro 1	-	-	unknown (KL1)	0	-	-
GCA_011006575.1	China	East Asia	ST1027	iuc 3	-	-	-	KL20	0	CTX-M-14	-
GCA_011029865.1	Lebanon	Middle East	ST147	iuc 1	-	rmp 1; KpVP-1,-	rmpA2_6*-47%	KL64	1	CTX-M-15	NDM-5;OXA-48
GCA_011044535.1	Russia	Europe	ST395	iuc 1	-	-	-	KL39	1	CTX-M-15	OXA-48
GCA_011044575.1	Russia	Europe	ST147	iuc 1	-	rmp 1; KpVP-1,-	rmpA2_6*-47%	KL20	1	CTX-M-15	NDM-1
GCA_011044635.1	Russia	Europe	ST147	iuc 1	-	rmp 1; KpVP-1,-	rmpA2_6*-47%	KL20	1	CTX-M-15	NDM-1
GCA_011044665.1	Russia	Europe	ST147	iuc 1	-	rmp 1; KpVP-1,-	rmpA2_6*-47%	KL20	1	CTX-M-15	NDM-1
GCA_011044695.1	Russia	Europe	ST15	iuc 1	-	rmp 1; KpVP-1 (truncated),-	rmpA2_9	KL19	1	CTX-M-15	NDM-1
GCA_011044735.1	Russia	Europe	ST48	iuc 1	-	rmp 1; KpVP-1 (incomplete),-	rmpA2_6*-47%	KL62	1	CTX-M-15	NDM-1
GCA_011044745.1	Russia	Europe	ST15	iuc 1	-	rmp 1; KpVP-1 (truncated),-	rmpA2_9	KL19	1	CTX-M-15	NDM-1
GCA_011044795.1	Russia	Europe	ST15	iuc 1	-	rmp 1; KpVP-1 (truncated),-	rmpA2_9	KL19	1	CTX-M-15	NDM-1
GCA_011044835.1	Russia	Europe	ST874	iuc 1	-	rmp 1; KpVP-1	rmpA2_6*-47%	KL45	1	CTX-M-15	NDM-1
GCA_011044855.1	Russia	Europe	ST15	iuc 1	-	rmp 1; KpVP-1,-	rmpA2_9	KL19	1	CTX-M-15	NDM-1
GCA_011044895.1	Russia	Europe	ST874	iuc 1	-	rmp 1; KpVP-1,-	rmpA2_6*-47%	KL45	1	CTX-M-15	NDM-1
GCA_011044915.1	Russia	Europe	ST147	iuc 1	-	rmp 1; KpVP-1,-	rmpA2_6*-47%	KL20	1	CTX-M-15	NDM-1
GCA_011044955.1	Russia	Europe	ST395	iuc 1	-	rmp 1; KpVP-1,-	rmpA2_9	KL2	1	CTX-M-15	NDM-1
GCA_011058615.1	Russia	Europe	ST377	iuc 1	-	-	-	KL102	1	CTX-M-15	OXA-48
GCA_011066505.1	China	East Asia	ST11	iuc 1	-	-	rmpA2_8-60%	KL47	1	CTX-M-65;SHV-12	KPC-2
GCA_011366155.1	China	East Asia	ST23	iuc 1	iro 1	rmp 1; KpVP-1,-	rmpA2_5-54%	KL1	1	-	-
GCA_011742045.1	India	South Asia	ST231	iuc 5	-	-	-	KL51	0	-	OXA-232
GCA_011742075.1	India	South Asia	ST2096	iuc 1	-	-	rmpA2_8-60%	KL64	0	CTX-M-15	OXA-232
GCA_011742195.1	India	South Asia	ST2096	iuc 1	-	-	rmpA2_8-60%	KL64	1	CTX-M-15	OXA-232
GCA_011742415.2	India	South Asia	ST2096	iuc 1	-	-	rmpA2_8-60%	KL64	1	CTX-M-15	OXA-232;OXA-232
GCA_011742585.2	India	South Asia	ST2096	iuc 1	-	-	rmpA2_8-60%	KL64	1	CTX-M-15	NDM-5
GCA_011742615.1	India	South Asia	ST231	iuc 5	-	-	-	KL51	0	-	OXA-232
GCA_011742715.1	India	South Asia	ST231	iuc 5	-	-	-	KL64	0	-	OXA-232
GCA_011742745.1	India	South Asia	ST231	iuc 5	-	-	-	KL51	0	-	OXA-232
GCA_011742805.1	India	South Asia	ST231	iuc 5	-	-	-	KL51	0	-	OXA-232
GCA_011742815.1	India	South Asia	ST2096	iuc 1	-	-	rmpA2_8-60%	KL64	1	CTX-M-15	OXA-232
GCA_011742845.1	India	South Asia	ST231	iuc 5	-	-	-	KL51	0	-	OXA-232
GCA_011752495.1	China	East Asia	ST11	iuc 1	-	-	rmpA2_8*	KL64	1	CTX-M-3	-
GCA_011759445.1	India	South Asia	ST2096	iuc 1	-	-	rmpA2_8-60%	KL64	1	CTX-M-15	-
GCA_011769825.1	Czech	Europe	ST15	iuc 1	-	rmp 1; KpVP-1	rmpA2_6*-55%	KL24	1	CTX-M-15	NDM-1;OXA-244
GCA_012169405.1	China	East Asia	ST86	-	iro 1	rmp 1; KpVP-1 (truncated)	-	KL2	0	-	KPC-2
GCA_012271755.1	Lebanon	Middle East	ST383	iuc 1	-	-	rmpA2_6*-47%	KL30	1	CTX-M-14^;CTX-M-15	NDM-5;OXA-48
GCA_012271775.1	Lebanon	Middle East	ST383	iuc 1	-	-	rmpA2_6*-47%	KL30	1	CTX-M-14^;CTX-M-15	NDM-5;OXA-48
GCA_012911525.1	India	South Asia	ST231	iuc 5	-	-	-	KL51	0	-	OXA-232
GCA_012944055.1	China	East Asia	ST660	iuc 1	iro 1	rmp 1; KpVP-1 (truncated)	rmpA2_5-54%	KL16	0	-	-
GCA_012963405.1	South Korea	East Asia	ST307	iuc 1	-	-	rmpA2_9	KL102	1	CTX-M-15	-
GCA_012963525.1	South Korea	East Asia	ST48	iuc 1	iro 1	rmp 1; KpVP-1	rmpA2_8*-59%	KL62	1	CTX-M-15;CTX-M-15	-
GCA_012963835.1	South Korea	East Asia	ST48	iuc 1	iro 1	rmp 1; KpVP-1	rmpA2_6-60%	KL62	1	CTX-M-15;CTX-M-15	-
GCA_012964005.1	South Korea	East Asia	ST48	iuc 1	iro 1	rmp 1; KpVP-1	rmpA2_5-54%	KL62	1	CTX-M-15;CTX-M-15	-
GCA_012964645.1	South Korea	East Asia	ST48	iuc 1	-	rmp 1; KpVP-1 (incomplete)	rmpA2_6-60%	KL62	0.7753	CTX-M-15;CTX-M-15	-
GCA_012965225.1	South Korea	East Asia	ST48	iuc 1	iro 1	rmp 1; KpVP-1	rmpA2_6-60%	KL62	1	CTX-M-15;CTX-M-15;CTX-M-15	-
GCA_012969865.1	South Korea	East Asia	ST25	iuc 1	iro 1	rmp 1; KpVP-1	rmpA2_3*-59%	KL2	1	CTX-M-15	-
GCA_012970245.1	South Korea	East Asia	ST23	iuc 1	iro 1	rmp 1; KpVP-1,-	rmpA2_5-54%	KL1	1	CTX-M-14^	-
GCA_012970385.1	South Korea	East Asia	ST48	iuc 1	iro 1	rmp 1; KpVP-1	rmpA2_6-60%	KL62	1	CTX-M-15;CTX-M-15	-
GCA_012970645.1	South Korea	East Asia	ST23	iuc 1	iro 1	rmp 1; KpVP-1	rmpA2_8*-54%	KL1	1	CTX-M-15	-
GCA_012971265.1	South Korea	East Asia	ST48	iuc 1	iro 1	rmp 1; KpVP-1	rmpA2_6*-47%	KL62	1	CTX-M-15;CTX-M-15	-
GCA_012971305.1	South Korea	East Asia	ST48	iuc 1	iro 1	rmp 1; KpVP-1	rmpA2_6*-47%	KL62	1	CTX-M-15;CTX-M-15	-
GCA_012971325.1	South Korea	East Asia	ST48	iuc 1	iro 1	rmp 1; KpVP-1	rmpA2_6-60%	KL62	1	CTX-M-15;CTX-M-15	-
GCA_012971345.1	South Korea	East Asia	ST65	iuc 1	iro 1	rmp 1; KpVP-1 (truncated)	rmpA2_6*-55%	KL2	1	CTX-M-14	-
GCA_012971485.1	South Korea	East Asia	ST48	iuc 1	iro 1 (incomplete)	rmp 1; KpVP-1	rmpA2_6-60%	KL62	1	CTX-M-15;CTX-M-15	-
GCA_012971645.1	South Korea	East Asia	ST86	iuc 1	iro 1	rmp 1; KpVP-1	rmpA2_4*-47%	KL2	1	CTX-M-15	-
GCA_012971985.1	South Korea	East Asia	ST48	iuc 1	iro 1	rmp 1; KpVP-1	rmpA2_6-60%	KL62	1	CTX-M-15;CTX-M-15	-
GCA_012972215.1	South Korea	East Asia	ST48	iuc 1	iro 1	rmp 1; KpVP-1	rmpA2_6-60%	KL62	1	CTX-M-15;CTX-M-15	-
GCA_012972235.1	South Korea	East Asia	ST48	iuc 1	iro 1	rmp 1; KpVP-1	rmpA2_5-54%	KL2	1	CTX-M-15;CTX-M-15	-
GCA_013283935.1	China	East Asia	ST1764	iuc 1	iro 1	rmp 1; KpVP-1	rmpA2_6*-55%	KL64	1	-	-
GCA_013348885.1	China	East Asia	ST11	iuc 1	-	rmp 1; KpVP-1	rmpA2_3-47%	KL64	0	CTX-M-65;SHV-12	KPC-2
GCA_013348905.1	China	East Asia	ST11	iuc 1	-	rmp 1; KpVP-1	rmpA2_3-47%	KL64	0	CTX-M-65;SHV-12	KPC-2
GCA_013348925.1	China	East Asia	ST11	iuc 1	-	rmp 1; KpVP-1	rmpA2_3-47%	KL64	1	CTX-M-65;SHV-12	KPC-2
GCA_013348945.1	China	East Asia	ST11	iuc 1	-	rmp 1; KpVP-1	rmpA2_3-47%	KL64	0	CTX-M-65;SHV-12	KPC-2
GCA_013348965.1	China	East Asia	ST11	iuc 1	-	rmp 1; KpVP-1	rmpA2_3-47%	KL64	1	CTX-M-65;SHV-12	KPC-2
GCA_013348985.1	China	East Asia	ST11	iuc 1	-	rmp 1; KpVP-1	rmpA2_3-47%	KL64	1	CTX-M-65;SHV-12	KPC-2
GCA_013349005.1	China	East Asia	ST11	iuc 1	-	rmp 1; KpVP-1	rmpA2_3-47%	KL64	1	CTX-M-65;SHV-12	KPC-2
GCA_013349025.1	China	East Asia	ST11	iuc 1	-	rmp 1; KpVP-1	rmpA2_3-47%	KL64	1	CTX-M-65;SHV-12	KPC-2
GCA_013349045.1	China	East Asia	ST11	iuc 1	-	rmp 1; KpVP-1	rmpA2_3-47%	KL64	0	CTX-M-65;SHV-12	KPC-2
GCA_013349065.1	China	East Asia	ST11	iuc 1	-	rmp 1; KpVP-1	rmpA2_3-47%	KL64	1	CTX-M-65;SHV-12	KPC-2
GCA_013349085.1	China	East Asia	ST11	iuc 1	-	rmp 1; KpVP-1	rmpA2_3-47%	KL64	0	CTX-M-65;SHV-12^	KPC-2
GCA_013415495.1	India	South Asia	ST2096	iuc 1	-	-	rmpA2_8-60%	KL64	1	CTX-M-15	-
GCA_013420725.1	China	East Asia	ST65	iuc 1	iro 1	rmp 1; KpVP-1 (truncated),-	rmpA2_6-60%	KL2	1	CTX-M-14;CTX-M-3	-
GCA_013421105.1	Russia	Europe	ST395	iuc 1	-	-	-	KL39	1	CTX-M-15	OXA-48
GCA_013421315.1	Russia	Europe	ST395	iuc 1	-	-	rmpA2_6*-49%	KL39	1	CTX-M-15	OXA-48
GCA_013625365.1	Malaysia	Southeast Asia	ST25	iuc 3	-	-	-	unknown (KL2)	0	CTX-M-15	-
GCA_013813035.1	United Kingdom	Europe	ST661	iuc 3	-	-	-	KL6	0	-	-
GCA_013826045.1	United Kingdom	Europe	ST966	iuc 3	-	-	-	KL142	0	-	-
GCA_013895695.1	United Kingdom	Europe	ST3153	iuc 3	-	-	-	KL51	0	-	-
GCA_014282505.1	China	East Asia	ST65	iuc 1	iro 1	rmp 1; KpVP-1 (truncated),-	rmpA2_6*-47%	KL2	1	-	-
GCA_014283205.1	China	East Asia	ST11	iuc 1	-	-	rmpA2_6*-55%	KL47	1	CTX-M-65	KPC-2
GCA_014283315.1	China	East Asia	ST893	iuc 1	iro 1	rmp 1; KpVP-1,-	rmpA2_8*	KL20	1	CTX-M-3	-
GCA_014283455.1	China	East Asia	ST23	iuc 1	-	-	rmpA2_6*-48%	KL1	1	CTX-M-3	-
GCA_014283645.1	China	East Asia	ST29	iuc 1	iro 1	rmp 1; KpVP-1 (truncated),-	rmpA2_8-60%	KL54	1	CTX-M-14;CTX-M-3;PER-1	-
GCA_014283685.1	China	East Asia	ST23	iuc 1	iro 1	rmp 1; KpVP-1,-	rmpA2_6-60%	KL1	1	-	IMP-4
GCA_014283845.1	China	East Asia	ST23	iuc 1	iro 1	rmp 1; KpVP-1,-	rmpA2_5-54%	KL1	1	-	-
GCA_014284915.1	China	East Asia	ST6471	iuc 1	-	-	rmpA2_8-60%	KL64	1	CTX-M-14;CTX-M-3;SHV-12^	-
GCA_014285195.1	China	East Asia	ST23	iuc 1	iro 1	rmp 1; KpVP-1,-	rmpA2_3-47%	KL1	1	-	-
GCA_014285215.1	China	East Asia	ST11	iuc 1	-	-	rmpA2_8*	KL64	1	CTX-M-3	-
GCA_014285305.1	China	East Asia	ST29	iuc 1	iro 1 (incomplete)	-	rmpA2_8-60%	KL54	1	CTX-M-14;PER-1	-
GCA_014285475.1	China	East Asia	ST29	iuc 1	iro 1	rmp 1; KpVP-1,-	rmpA2_8*-60%	KL54	1	-	-
GCA_014285665.1	China	East Asia	ST383	iuc 1	-	rmp 1; KpVP-1 (incomplete),-	rmpA2_6*-47%	KL30	1	CTX-M-14^	OXA-48
GCA_014285675.1	China	East Asia	ST383	iuc 1	-	rmp 1; KpVP-1 (incomplete),-	rmpA2_6*-47%	KL30	0	CTX-M-14^	OXA-48
GCA_014285735.1	China	East Asia	ST383	iuc 1	-	rmp 1; KpVP-1 (incomplete),-	rmpA2_6*-47%	KL30	1	CTX-M-14^	OXA-48
GCA_014285755.1	China	East Asia	ST15	iuc 1	-	-	rmpA2_8-60%	KL19	1	CTX-M-15	KPC-2
GCA_014285765.1	China	East Asia	ST1265	iuc 1	iro 1	rmp 1; KpVP-1,-	rmpA2_8-60%	KL1	1	-	KPC-2
GCA_014285815.1	China	East Asia	ST147	iuc 1	-	rmp 1; KpVP-1 (incomplete),-	rmpA2_6*-47%	unknown (KL81)	1	CTX-M-14^;CTX-M-55	OXA-48
GCA_014285835.1	China	East Asia	ST383	iuc 1	-	rmp 1; KpVP-1 (incomplete),-	rmpA2_6*-55%	KL30	1	CTX-M-14^	OXA-48
GCA_014285865.1	China	East Asia	ST107	iuc 5	iro 5	-	-	KL10	0	CTX-M-3	-
GCA_014285895.1	China	East Asia	ST514	iuc 3	iro 3 (truncated)	rmp 3; ICEKp1	-	KL39	0	CTX-M-14;SFO-1.v1	IMP-4
GCA_014286025.1	China	East Asia	ST383	iuc 1	-	rmp 1; KpVP-1 (incomplete),-	rmpA2_6*-47%	KL30	0	CTX-M-14^	OXA-48
GCA_014286055.1	China	East Asia	ST86	iuc 1	iro 1	rmp 1; KpVP-1,-	rmpA2_9*-48%	KL2	1	-	-
GCA_014286065.1	China	East Asia	ST23	iuc 1	iro 1	rmp 1; KpVP-1,-	rmpA2_5-54%	KL1	1	-	-
GCA_014286185.1	China	East Asia	ST25	iuc 3	iro 3 (truncated)	rmp 3; ICEKp1	-	KL2	0	CTX-M-14;CTX-M-3;SHV-12	-
GCA_014286225.1	China	East Asia	ST25	iuc 3	iro 3 (truncated)	rmp 3; ICEKp1	-	KL2	0	CTX-M-14;CTX-M-3;SHV-12	-
GCA_014286485.1	China	East Asia	ST86	iuc 1	iro 1	rmp 1; KpVP-1	-	KL2	1	-	-
GCA_014286595.1	China	East Asia	ST25	-	iro 3 (truncated)	rmp 3; ICEKp1	-	KL2	0	-	-
GCA_014286625.1	China	East Asia	ST25	-	iro 3 (truncated)	rmp 3; ICEKp1	-	KL2	0	-	-
GCA_014286865.1	China	East Asia	ST494	iuc 3	-	-	-	KL25	0	CTX-M-14;CTX-M-15	-
GCA_014287045.1	China	East Asia	ST23	iuc 1	iro 1	rmp 1; KpVP-1,-	rmpA2_5-54%	KL1	1	-	-
GCA_014287095.1	China	East Asia	ST65	iuc 1	iro 1	rmp 1; KpVP-1 (truncated),-	rmpA2_6-60%	KL2	1	-	-
GCA_014287235.1	China	East Asia	ST65	iuc 1	iro 1	rmp 1; KpVP-1 (truncated),-	rmpA2_3-47%	KL2	1	CTX-M-14	-
GCA_014288155.1	China	East Asia	ST65	iuc 1	iro 1	rmp 1; KpVP-1 (truncated)	-	KL2	1	-	-
GCA_014288175.1	China	East Asia	ST23	iuc 1	iro 1	rmp 1; KpVP-1,-	rmpA2_3-47%	KL1	1	-	-
GCA_014288205.1	China	East Asia	ST375	iuc 1	iro 1	rmp 1; KpVP-1,-	rmpA2_3-47%	KL2	1	-	-
GCA_014288245.1	China	East Asia	ST23	iuc 1	iro 1	rmp 1; KpVP-1,-	rmpA2_6-60%	KL1	1	-	-
GCA_014288295.1	China	East Asia	ST198	-	iro 3 (truncated)	rmp 3; ICEKp1	-	KL30	0	-	-
GCA_014288385.1	China	East Asia	ST383	iuc 1	-	rmp unknown,-	rmpA2_6*-47%	KL30	1	CTX-M-14^	OXA-48
GCA_014288395.1	China	East Asia	ST65	iuc 1	iro 1	rmp 1; KpVP-1 (truncated),-	rmpA2_5-54%	KL2	1	-	-
GCA_014288455.1	China	East Asia	ST383	iuc 1	-	rmp 1; KpVP-1 (incomplete),-	rmpA2_6*-55%	KL30	1	CTX-M-14^	OXA-48*
GCA_014288535.1	China	East Asia	ST23	iuc 1	iro 1	rmp 1; KpVP-1,-	rmpA2_3-47%	KL1	1	-	-
GCA_014288675.1	China	East Asia	ST23	iuc 1	iro 1	rmp 1; KpVP-1,-	rmpA2_6-60%	KL1	1	CTX-M-3	-
GCA_014288705.1	China	East Asia	ST23	iuc 1	iro 1	rmp 1; KpVP-1,-	rmpA2_6-60%	KL1	1	CTX-M-3	-
GCA_014288855.1	China	East Asia	ST23	iuc 1	iro 1	rmp 1; KpVP-1,-	rmpA2_6-60%	KL1	1	CTX-M-3	-
GCA_014288915.1	China	East Asia	ST23	iuc 1	iro 1	rmp 1; KpVP-1,-	rmpA2_3-47%	KL1	1	-	-
GCA_014288975.1	China	East Asia	ST25	iuc 1	iro 1	rmp 1; KpVP-1,-	rmpA2_6*-55%	KL2	1	-	-
GCA_014289095.1	China	East Asia	ST23	iuc 1	iro 1	rmp 1; KpVP-1,-	rmpA2_6-60%	KL1	1	-	-
GCA_014289265.1	China	East Asia	ST11	iuc 1	-	-	rmpA2_2-54%	KL47	1	CTX-M-65	KPC-2
GCA_014289275.1	China	East Asia	ST374	iuc 1	iro 1	rmp 1; KpVP-1,-	rmpA2_9	KL2	0	-	-
GCA_014289285.1	China	East Asia	ST11	iuc 1	-	-	rmpA2_2-54%	KL47	1	CTX-M-65	KPC-2
GCA_014289335.1	China	East Asia	ST374	iuc 1	iro 1	rmp 1; KpVP-1,-	rmpA2_9	KL2	1	-	-
GCA_014289355.1	China	East Asia	ST383	iuc 1	-	rmp 1; KpVP-1 (incomplete),-	rmpA2_6*-47%	KL30	1	CTX-M-14^	OXA-48
GCA_014289375.1	China	East Asia	ST65	iuc 1	iro 1	rmp 1; KpVP-1 (truncated)	-	KL2	1	-	-
GCA_014289495.1	China	East Asia	ST23	iuc 1	iro 1	rmp 1; KpVP-1,-	rmpA2_3-47%	KL1	1	-	-
GCA_014289535.1	China	East Asia	ST198	-	iro 3 (truncated)	rmp 3; ICEKp1	-	KL30	0	-	-
GCA_014289545.1	China	East Asia	ST23	iuc 1	iro 1	rmp 1; KpVP-1 (truncated),-	rmpA2_3-47%	KL1	1	-	-
GCA_014289665.1	China	East Asia	ST380	iuc 2	iro 2	rmp 2; KpVP-2	-	KL2	0	-	-
GCA_014289705.1	China	East Asia	ST23	iuc 1	iro 1	rmp 1; KpVP-1 (truncated),-	rmpA2_3*-47%	KL1	1	-	-
GCA_014289735.1	China	East Asia	ST86	iuc 1	iro 1	rmp 1; KpVP-1,-	rmpA2_9*	KL2	1	-	-
GCA_014289785.1	China	East Asia	ST65	iuc 1	iro 1	rmp 1; KpVP-1 (truncated),-	rmpA2_5-54%	KL2	1	-	-
GCA_014289885.1	China	East Asia	ST65	iuc 1	iro 1	rmp 1; KpVP-1 (truncated),-	rmpA2_6*-55%	KL2	1	-	-
GCA_014290045.1	China	East Asia	ST23	iuc 1	iro 1	rmp 1; KpVP-1,-	rmpA2_5-54%	KL1	1	-	-
GCA_014290145.1	China	East Asia	ST592	iuc 1	iro 1	rmp 1; KpVP-1,-	rmpA2_6*-60%	KL57	1	-	-
GCA_014304835.1	Singapore	Southeast Asia	ST65	iuc 1	iro 1	rmp 1; KpVP-1 (truncated)	rmpA2_8*-59%	unknown (KL2)	1	-	KPC-2
GCA_014596325.1	China	East Asia	ST11	iuc 1	-	rmp 1; KpVP-1,-	rmpA2_3-47%	KL64	1	CTX-M-65	KPC-2
GCA_014655345.1	China	East Asia	ST1027	iuc 3	-	-	-	KL20	0	CTX-M-15	IMP-4
GCA_014655735.1	China	East Asia	ST11	iuc 3	-	-	-	KL64	0	CTX-M-147*	KPC-2
GCA_014655815.1	China	East Asia	ST709	iuc 1	iro 1	rmp 1; KpVP-1	rmpA2_6-60%	KL9	1	CTX-M-15	NDM-5
GCA_014655835.1	China	East Asia	ST709	iuc 1	iro 1	rmp 1; KpVP-1	rmpA2_6-60%	KL9	1	CTX-M-15	NDM-5
GCA_014673015.1	India	South Asia	ST4847	iuc 1	iro 1	rmp 1; KpVP-1,-	rmpA2_2*-47%	KL57	1	-	OXA-232
GCA_014673295.1	India	South Asia	ST23	iuc 1	iro 1	rmp 1; KpVP-1,-	rmpA2_5-54%	KL1	1	-	OXA-232
GCA_014673415.1	India	South Asia	ST231	iuc 5	-	-	-	KL64	0	-	OXA-232
GCA_014673445.1	India	South Asia	ST660	iuc 1	iro 1	rmp 1; KpVP-1 (truncated),-	rmpA2_5-54%	KL16	1	-	-
GCA_014725775.1	Singapore	Southeast Asia	ST86	iuc 1	-	rmp 1; KpVP-1	rmpA2_6*-55%	KL2	1	-	KPC-2
GCA_014833455.1	USA	North America	ST611	-	-	rmp 1; ybt4 (truncated)	-	KL49	0	-	-
GCA_014834835.1	USA	North America	ST231	iuc 5	-	-	-	KL51	0	-	OXA-232
GCA_014835035.1	USA	North America	ST231	iuc 5	-	-	-	KL51	0	-	OXA-232
GCA_014840635.1	Pakistan	South Asia	ST231	iuc 5	-	-	-	KL51	0	-	OXA-232
GCA_014840655.1	Pakistan	South Asia	ST29	iuc 1	iro 1	rmp 1; KpVP-1,-	rmpA2_8-60%	KL54	1	-	-
GCA_014840735.1	Pakistan	South Asia	ST65	iuc 1	iro 1	rmp 1; KpVP-1 (truncated),-	rmpA2_5-54%	KL2	1	-	-
GCA_014854815.1	China	East Asia	ST11	iuc 1	-	rmp 1; KpVP-1	rmpA2_3-47%	KL64	0	CTX-M-65;SHV-12;SHV-12^	KPC-2
GCA_014893975.1	Madagascar	Africa	ST65	iuc 1	-	-	-	KL2	1	-	-
GCA_014893995.1	Madagascar	Africa	ST86	iuc 1	iro 1	rmp unknown	-	KL2	1	-	-
GCA_014894015.1	Madagascar	Africa	ST3443	iuc 1	-	-	-	unknown (KL2)	0	-	-
GCA_015074925.1	Russia	Europe	ST23	iuc 1	iro 1	rmp 1; KpVP-1	rmpA2_8-60%	KL1	1	CTX-M-15	OXA-48
GCA_015159775.2	India	South Asia	ST43	iuc 1	-	-	rmpA2_6-60%	KL30	1	CTX-M-15	OXA-181;OXA-181
GCA_015207945.1	Russia	Europe	ST218	iuc 1	iro 1	rmp 1; KpVP-1,-	rmpA2_8-60%	KL57	1	-	-
GCA_015207995.1	Russia	Europe	ST86	iuc 1	iro 1	rmp 1; KpVP-1,-	rmpA2_4*-47%	KL2	1	-	-
GCA_015208015.1	Russia	Europe	ST395	iuc 1	-	-	-	KL2	1	CTX-M-15	OXA-48
GCA_015209155.1	Russia	Europe	ST218	iuc 1	iro 1	rmp 1; KpVP-1,-	rmpA2_8-60%	KL57	1	CTX-M-15	OXA-244
GCA_015209215.1	Russia	Europe	ST86	iuc 1	iro 1	rmp 1; KpVP-1	-	KL2	1	-	-
GCA_015209235.1	Russia	Europe	ST86	iuc 1	iro 1	rmp 1; KpVP-1	-	KL2	1	-	-
GCA_015209245.1	Russia	Europe	ST218	iuc 1	iro 1	rmp unknown	rmpA2_8-60%	unknown (KL57)	1	CTX-M-15	OXA-244
GCA_015209285.1	Russia	Europe	ST23	iuc 1	iro 1	rmp 1; KpVP-1,-	rmpA2_5-54%	KL1	1	-	-
GCA_015209325.1	Russia	Europe	ST23	iuc 1	iro 1	rmp 1; KpVP-1,-	rmpA2_5*-54%	KL1	1	-	-
GCA_015209345.1	Russia	Europe	ST218	iuc 1	iro 1	-	rmpA2_8-60%	unknown (KL57)	1	CTX-M-15	OXA-244
GCA_015209405.1	Russia	Europe	ST395	iuc 1	-	-	-	KL2	1	-	OXA-48
GCA_015209425.1	Russia	Europe	ST218	iuc 1	iro 1	rmp 1; KpVP-1,-	rmpA2_8-60%	unknown (KL57)	1	CTX-M-15	OXA-244
GCA_015209465.1	Russia	Europe	ST395	iuc 1	-	-	-	KL108	1	CTX-M-15	OXA-48
GCA_015209475.1	Russia	Europe	ST218	iuc 1	iro 1	rmp 1; KpVP-1,-	rmpA2_8-60%	KL57	1	CTX-M-15	OXA-244
GCA_015228705.1	China	East Asia	ST11	iuc 1 (truncated)	-	rmp 1; KpVP-1 (truncated),-	rmpA2_3-47%	KL64	1	-	KPC-2;NDM-5
GCA_015228715.1	China	East Asia	ST11	iuc 1 (truncated)	-	rmp 1; KpVP-1 (truncated),-	rmpA2_3-47%	KL64	1	-	KPC-2
GCA_015243235.1	China	East Asia	ST11	iuc 1	-	rmp 1; KpVP-1	rmpA2_3-47%	KL64	1	CTX-M-65;SHV-12	KPC-2
GCA_015277755.1	China	East Asia	ST11	iuc 1	-	rmp 1; KpVP-1 (truncated)	rmpA2_3-47%	KL64	1	CTX-M-65	KPC-2
GCA_015277915.1	China	East Asia	ST1	iuc 3	-	-	-	KL123	0	CTX-M-55	-
GCA_015277955.1	China	East Asia	ST1	iuc 3	-	-	-	KL123	0	CTX-M-55	-
GCA_015283665.1	China	East Asia	ST86	iuc 1	iro 1	rmp 1; KpVP-1	rmpA2_2*-35%	KL2	1	-	-
GCA_015284665.1	China	East Asia	ST23	iuc 1	iro 1	rmp 1; KpVP-1	rmpA2_6*-60%	KL1	1	-	-
GCA_015284925.1	China	East Asia	ST2158	iuc 1,iuc 5	iro 1	rmp 1; KpVP-1	rmpA2_2*-47%	KL25	1	CTX-M-55	-
GCA_015285145.1	China	East Asia	ST111	-	iro 1	rmp 1; KpVP-1	-	KL63	0	-	-
GCA_015286445.1	China	East Asia	ST23	iuc 1	iro 1	rmp 1; KpVP-1	rmpA2_6-60%	KL1	1	-	-
GCA_015287605.1	China	East Asia	ST36	iuc 3	-	-	-	unknown (KL27)	0	-	-
GCA_015290985.1	China	East Asia	ST23	iuc 1	iro 1	rmp 1; KpVP-1	rmpA2_6*-60%	KL1	1	CTX-M-14;CTX-M-14	NDM-1
GCA_015355835.1	China	East Asia	ST23	iuc 1	iro 1	rmp 1; KpVP-1	rmpA2_3-47%	KL1	1	-	-
GCA_015355855.1	China	East Asia	ST23	iuc 1	iro 1	rmp 1; KpVP-1	rmpA2_3-47%	KL1	1	-	-
GCA_015355875.1	China	East Asia	ST11	iuc 1	-	rmp 1; KpVP-1 (truncated)	rmpA2_3-47%	KL64	1	CTX-M-14	KPC-2;KPC-2
GCA_015355895.1	China	East Asia	ST11	iuc 1	-	rmp 1; KpVP-1 (truncated)	rmpA2_3-47%	KL64	1	CTX-M-14	KPC-2;KPC-2
GCA_015355915.1	China	East Asia	ST11	iuc 1	-	rmp 1; KpVP-1	rmpA2_3-47%	KL64	1	CTX-M-14	KPC-2
GCA_015355935.1	China	East Asia	ST11	iuc 1	-	rmp 1; KpVP-1	rmpA2_3-47%	KL64	1	CTX-M-14;SHV-12;SHV-12	KPC-2
GCA_015355955.1	China	East Asia	ST23	iuc 1	iro 1	rmp 1; KpVP-1	rmpA2_3-47%	KL1	1	-	KPC-2
GCA_015355975.1	China	East Asia	ST23	iuc 1	iro 1	rmp 1; KpVP-1	rmpA2_3-47%	KL1	1	-	KPC-2
GCA_015355995.1	China	East Asia	ST11	iuc 1	-	rmp 1; KpVP-1	rmpA2_6-60%	KL64	1	CTX-M-14;SHV-12	KPC-2
GCA_015356015.1	China	East Asia	ST11	iuc 1	-	rmp 1; KpVP-1 (truncated)	rmpA2_3-47%	KL64	1	CTX-M-14	KPC-2
GCA_015476795.1	Hong Kong	East Asia	ST3392	iuc 1	-	-	rmpA2_8*-36%	unknown (KL64)	1	-	NDM-1;OXA-232
GCA_015645745.1	Russia	Europe	ST218	iuc 1	iro 1	rmp unknown	rmpA2_8-60%	unknown (KL57)	0	CTX-M-15	OXA-244
GCA_015645755.1	Russia	Europe	ST86	iuc 1	iro 1	rmp 1; KpVP-1,-	rmpA2_9	KL2	1	-	-
GCA_015645785.1	Russia	Europe	ST395	iuc 1	-	-	-	KL108	1	CTX-M-15	OXA-48
GCA_015645805.1	Russia	Europe	ST23	iuc 1	iro 1	rmp 1; KpVP-1,-	rmpA2_8-60%	unknown (KL1)	1	CTX-M-15	OXA-48
GCA_015645815.1	Russia	Europe	ST395	iuc 1	-	-	-	KL108	1	CTX-M-15	OXA-48
GCA_015645885.1	Russia	Europe	ST48	iuc 1	-	-	-	KL62	1	CTX-M-15	-
GCA_015645905.1	Russia	Europe	ST218	iuc 1	iro 1	rmp 1; KpVP-1,-	rmpA2_8-60%	KL57	1	-	-
GCA_015645935.1	Russia	Europe	ST23	iuc 1	-	rmp unknown,-,-	rmpA2_8*-60%	KL57	1	CTX-M-55	-
GCA_015645965.1	Russia	Europe	ST23	iuc 1	-	rmp unknown,-,-	rmpA2_8*	unknown (KL57)	1	CTX-M-55	-
GCA_015645995.1	Russia	Europe	ST147	iuc 1	-	-	-	KL10	1	CTX-M-15	OXA-48
GCA_015646035.1	Russia	Europe	ST147	iuc 1	-	-	-	KL10	1	CTX-M-15	OXA-48
GCA_015690055.1	Singapore	Southeast Asia	ST893	iuc 1	iro 1	rmp 1; KpVP-1	rmpA2_8*	KL20	1	CTX-M-15	KPC-2
GCA_015699985.1	France	Europe	ST86	iuc 1	iro 1	rmp 1; KpVP-1 (incomplete)	-	KL2	1	-	-
GCA_015700015.1	France	Europe	ST23	iuc 1	iro 1	rmp 1; KpVP-1,-	rmpA2_5-54%	KL1	0	-	-
GCA_015700025.1	France	Europe	ST23	iuc 1	iro 1	rmp 1; KpVP-1,-	rmpA2_5-54%	KL1	1	-	-
GCA_015720885.1	USA	North America	ST258	iuc 5	iro unknown	-	-	KL107	0	-	KPC-3
GCA_015731585.1	China	East Asia	ST35	iuc 3	-	-	-	KL22	0	-	-
GCA_015826235.1	Brazil	South America	ST86	iuc 1	iro 1 (truncated)	rmp 1; KpVP-1 (truncated),-	rmpA2_2*-47%	KL2	1	-	-
GCA_015826265.1	Brazil	South America	ST86	iuc 1 (truncated)	iro 1 (truncated)	rmp 1; KpVP-1,-	rmpA2_2-54%	KL2	1	-	-
GCA_015832035.1	China	East Asia	ST375	iuc 1	iro 1	rmp 1; KpVP-1	rmpA2_5-54%	KL2	1	-	-
GCA_015910145.1	Canada	North America	ST376	iuc 1	-	-	rmpA2_6*-47%	KL2	1	CTX-M-14^	VIM-1
GCA_015999625.1	China	East Asia	ST11	iuc 1	-	rmp 1; KpVP-1 (truncated)	rmpA2_3-47%	KL64	1.0042	-	-
GCA_016107385.1	Italy	Europe	ST147	iuc 1	-	rmp 1; KpVP-1 (incomplete)	-	KL64	1	CTX-M-15	NDM-9
GCA_016107405.1	Italy	Europe	ST147	iuc 1	-	rmp 1; KpVP-1 (incomplete)	-	KL64	1	CTX-M-15	NDM-9
GCA_016135915.1	Russia	Europe	ST15	iuc 1	-	-	rmpA2_8-60%	KL19	0	-	-
GCA_016135935.1	Russia	Europe	ST395	iuc 1	-	rmp 1; KpVP-1 (truncated)	rmpA2_5-54%	KL2	1	CTX-M-15	OXA-48
GCA_016136235.1	Russia	Europe	ST395	iuc 1	-	-	-	KL108	1	CTX-M-3	NDM-1
GCA_016136435.1	Russia	Europe	ST48	iuc 1 (truncated)	-	-	-	unknown (KL62)	1	-	OXA-48
GCA_016136535.1	Russia	Europe	ST395-1LV	iuc 1	-	-	-	unknown (KL2)	1	CTX-M-15	OXA-48
GCA_016136555.1	Russia	Europe	ST395	iuc 1	-	-	-	unknown (KL2)	1	CTX-M-15	OXA-48
GCA_016136595.1	Russia	Europe	ST395	iuc 1	-	-	-	unknown (KL2)	1	CTX-M-15	OXA-48
GCA_016136615.1	Russia	Europe	ST395	iuc 1	-	-	-	unknown (KL2)	1	CTX-M-15	OXA-48
GCA_016136675.1	Russia	Europe	ST395	iuc 1	-	-	-	unknown (KL2)	1	CTX-M-15	OXA-48
GCA_016136715.1	Russia	Europe	ST395	iuc 1	-	-	-	unknown (KL2)	1	CTX-M-15	OXA-48
GCA_016136745.1	Russia	Europe	ST395	iuc 1	-	-	-	unknown (KL2)	1	-	OXA-48
GCA_016137065.1	Russia	Europe	ST395	iuc 1	-	-	-	unknown (KL2)	1	CTX-M-15	OXA-48
GCA_016137075.1	Russia	Europe	ST307	iuc 1	-	-	-	unknown (KL107)	1	CTX-M-15	OXA-48
GCA_016137135.1	Russia	Europe	ST307	iuc 1	-	-	-	KL102	1	CTX-M-15	OXA-48
GCA_016137235.1	Russia	Europe	ST395	iuc 1	-	rmp 1; KpVP-1 (truncated),-	rmpA2_5-54%	unknown (KL2)	1	CTX-M-15	OXA-48
GCA_016137295.1	Russia	Europe	ST395	iuc 1	-	rmp unknown	rmpA2_5-54%	unknown (KL5)	0.5876	CTX-M-15	OXA-48
GCA_016137735.1	Poland	Europe	ST11	iuc 5 (truncated)	iro 5 (truncated)	-	-	KL105	0	-	-
GCA_016137905.1	Latvia	Europe	ST86	iuc 1	-	-	rmpA2_5-54%	KL2	0	-	-
GCA_016137975.1	Latvia	Europe	ST17-1LV	iuc 1	iro 1	rmp 1; KpVP-1,-	rmpA2_5-54%	KL23	1	CTX-M-5	-
GCA_016138005.1	Latvia	Europe	ST86	iuc 1	-	rmp 1; KpVP-1 (truncated),-	rmpA2_6*-47%	KL2	1	-	-
GCA_016138075.1	Latvia	Europe	ST86	iuc 1	-	rmp 1; KpVP-1,-	rmpA2_5-54%	KL2	0	-	-
GCA_016138265.1	Lithuania	Europe	ST86	iuc 1	-	-	rmpA2_5-54%	unknown (KL2)	1	-	-
GCA_016138735.1	Belarus	Europe	ST25	iuc 1	iro 1	rmp 1; KpVP-1	rmpA2_3-47%	KL2	1	-	-
GCA_016138755.1	Belarus	Europe	ST307	iuc 1	-	-	-	KL102	1	CTX-M-15	OXA-48
GCA_016138825.1	Belarus	Europe	ST395	iuc 1	-	-	-	KL2	1	CTX-M-15	-
GCA_016138855.1	Belarus	Europe	ST25	iuc 1	iro 1	rmp 1; KpVP-1,-	rmpA2_3-47%	KL2	1	-	OXA-72
GCA_016138905.1	Belarus	Europe	ST996-2LV	iuc 1	-	-	-	unknown (KL2)	1	CTX-M-15	OXA-48
GCA_016138945.1	Belarus	Europe	ST307	iuc 1	-	-	-	KL102	1	CTX-M-15	OXA-48
GCA_016138995.1	Belarus	Europe	ST395	iuc 1	-	-	-	KL2	1	CTX-M-15	OXA-48
GCA_016139065.1	Belarus	Europe	ST395	iuc 1	-	-	-	KL2	1	CTX-M-15	OXA-48
GCA_016139095.1	Belarus	Europe	ST23	iuc 1	iro 1	rmp 1; KpVP-1 (truncated),-	rmpA2_3-47%	KL1	1	-	-
GCA_016403065.1	China	East Asia	ST11	iuc 1	-	-	rmpA2_3-47%	KL21	1	CTX-M-65;SHV-12^	KPC-2
GCA_016403085.1	China	East Asia	ST11	iuc 1	-	rmp 1; KpVP-1	rmpA2_3-47%	KL64	1	CTX-M-65;SHV-12	KPC-2
GCA_016458315.1	China	East Asia	ST11	-	-	rmp 1; KpVP-1	-	KL64	0	CTX-M-65	KPC-2
GCA_016458405.1	China	East Asia	ST11	-	-	rmp 1; KpVP-1	-	KL64	0	CTX-M-65	KPC-2
GCA_016482645.1	India	South Asia	ST43	iuc 1	-	-	rmpA2_6-60%	KL30	1	-	-
GCA_016482655.1	India	South Asia	ST43	iuc 1	-	-	rmpA2_6-60%	KL30	1	-	OXA-181
GCA_016595605.1	China	East Asia	ST751	iuc 1	-	rmp 1; KpVP-1	rmpA2_3-47%	KL64	1	CTX-M-65	KPC-2
GCA_016598795.1	Russia	Europe	ST147	iuc 1	-	rmp 1; KpVP-1	rmpA2_6*-47%	KL20	1	-	NDM-29
GCA_016634505.1	Australia	Oceania	ST23	iuc 1	iro 1	rmp 1; KpVP-1,-	rmpA2_5-54%	KL1	1	-	-
GCA_016634525.1	Australia	Oceania	ST592	iuc 1	iro 1	rmp 1; KpVP-1,-	rmpA2_5*-54%	KL57	1	-	-
GCA_016634705.1	Australia	Oceania	ST336	iuc 1	iro 1	rmp 1; KpVP-1,-	rmpA2_8-60%	KL25	1	CTX-M-15	-
GCA_016634875.1	Australia	Oceania	ST65	iuc 1	iro 1	rmp 1; KpVP-1 (truncated),-	rmpA2_6*-55%	KL2	1	-	-
GCA_016634945.1	Australia	Oceania	ST336	iuc 1	iro 1	rmp 1; KpVP-1,-	rmpA2_8-60%	KL25	1	CTX-M-15	-
GCA_016635135.1	Australia	Oceania	ST23	iuc 1	iro 1	rmp 1; KpVP-1 (truncated),-	rmpA2_6-60%	KL1	1	-	-
GCA_016635215.1	Australia	Oceania	ST23	iuc 1	iro 1	rmp 1; KpVP-1,-	rmpA2_6-60%	KL1	1	-	-
GCA_016635285.1	Australia	Oceania	ST1049	iuc 1	iro 1	rmp 1; KpVP-1,-	rmpA2_5-54%	KL5	1	-	-
GCA_016635385.1	Australia	Oceania	ST1761	iuc 1	iro 1	rmp 1; KpVP-1,-	rmpA2_3-47%	KL1	1	-	-
GCA_016635435.1	Australia	Oceania	ST86	iuc 1	iro 1	rmp 1; KpVP-1,-	rmpA2_9*	KL2	1	-	-
GCA_016635465.1	Australia	Oceania	ST65	iuc 1	iro 1	rmp 1; KpVP-1 (truncated),-	rmpA2_6*-60%	KL2	1	-	-
GCA_016635565.1	Australia	Oceania	ST375	iuc 1	iro 1	rmp 1; KpVP-1,-	rmpA2_3-47%	KL2	1	-	-
GCA_016635685.1	Australia	Oceania	ST25	iuc 1	iro 1	rmp 1; KpVP-1,-	rmpA2_5-54%	KL2	1	CTX-M-15	-
GCA_016635825.1	Australia	Oceania	ST25	iuc 1	iro 1	rmp 1; KpVP-1,-	rmpA2_5-54%	KL2	1	CTX-M-15	-
GCA_016635985.1	Australia	Oceania	ST86	iuc 1	iro 1	rmp 1; KpVP-1,-	rmpA2_6*-47%	KL2	1	-	-
GCA_016635995.1	Australia	Oceania	ST65	iuc 1	iro 1	rmp 1; KpVP-1 (truncated),-	rmpA2_6-60%	KL2	1	-	-
GCA_016679905.1	China	East Asia	ST11	iuc 1	-	rmp 1; KpVP-1,-	rmpA2_3-47%	KL64	1	CTX-M-65	KPC-2
GCA_016679935.1	China	East Asia	ST11	iuc 1	-	-	rmpA2_3-47%	KL21	1	CTX-M-65	KPC-2
GCA_016680095.1	China	East Asia	ST11	iuc 1	-	rmp 1; KpVP-1,-	rmpA2_3-47%	KL64	1	SHV-12	KPC-2
GCA_016680155.1	China	East Asia	ST11	iuc 1	-	rmp 1; KpVP-1,-	rmpA2_3-47%	KL64	1	-	KPC-2
GCA_016680165.1	China	East Asia	ST11	iuc 1	-	rmp 1; KpVP-1,-	rmpA2_3-47%	KL64	1	CTX-M-65	KPC-2
GCA_016680195.1	China	East Asia	ST11	iuc 1	-	rmp 1; KpVP-1,-	rmpA2_3-47%	KL64	1	-	KPC-2
GCA_016680205.1	China	East Asia	ST11	iuc 1	-	-	rmpA2_3-47%	KL21	1	-	KPC-2
GCA_016680295.1	China	East Asia	ST11	iuc 1	-	-	rmpA2_3-47%	KL21	1	CTX-M-65	KPC-2
GCA_016680335.1	China	East Asia	ST11	iuc 1	-	-	rmpA2_3-47%	KL21	1	-	KPC-2
GCA_016680365.1	China	East Asia	ST11	iuc 1	-	rmp 1; KpVP-1,-	rmpA2_3-47%	KL64	1	CTX-M-65	KPC-2
GCA_016680405.1	China	East Asia	ST11	iuc 1	-	-	rmpA2_3-47%	KL21	1	CTX-M-65	KPC-2
GCA_016680415.1	China	East Asia	ST11	iuc 1	-	-	rmpA2_3-47%	KL21	0	-	KPC-2
GCA_016680485.1	China	East Asia	ST11	iuc 1	-	-	rmpA2_3-47%	KL21	1	CTX-M-65	KPC-2
GCA_016680545.1	China	East Asia	ST11	iuc 1	-	-	rmpA2_3-47%	KL21	1	-	KPC-2
GCA_016680595.1	China	East Asia	ST11	iuc 1	-	-	rmpA2_3-47%	KL21	1	CTX-M-65	KPC-2
GCA_016680615.1	China	East Asia	ST11	iuc 1	-	rmp 1; KpVP-1,-	rmpA2_3-47%	KL64	1	-	KPC-2
GCA_016680625.1	China	East Asia	ST11	iuc 1	-	rmp 1; KpVP-1,-	rmpA2_3-47%	KL64	1	-	KPC-2
GCA_016680655.1	China	East Asia	ST11	iuc 1	-	rmp 1; KpVP-1,-	rmpA2_3-47%	KL64	1	CTX-M-65	KPC-2
GCA_016680675.1	China	East Asia	ST11	iuc 1	-	rmp 1; KpVP-1,-	rmpA2_3-47%	KL64	1	CTX-M-65	KPC-2
GCA_016680715.1	China	East Asia	ST11	iuc 1	-	rmp 1; KpVP-1 (truncated)	rmpA2_3-47%	KL64	1	SHV-12	KPC-2
GCA_016680735.1	China	East Asia	ST11	iuc 1	-	-	rmpA2_3-47%	KL21	1	-	KPC-2
GCA_016680745.1	China	East Asia	ST11	iuc 1	-	-	rmpA2_3-47%	KL64	1	-	KPC-2
GCA_016680755.1	China	East Asia	ST11	iuc 1	-	-	rmpA2_3-47%	KL21	1	CTX-M-65	KPC-2
GCA_016680795.1	China	East Asia	ST11	iuc 1	-	-	rmpA2_3-47%	KL21	1	-	KPC-2
GCA_016680835.1	China	East Asia	ST11	iuc 1	-	-	rmpA2_3-47%	KL21	1	CTX-M-65	KPC-2
GCA_016680855.1	China	East Asia	ST11	iuc 1	-	-	rmpA2_3-47%	KL64	0	-	KPC-2
GCA_016680875.1	China	East Asia	ST11	iuc 1	-	-	rmpA2_3-47%	KL64	1	CTX-M-65	KPC-2
GCA_016680895.1	China	East Asia	ST11	iuc 1	-	-	rmpA2_3-47%	KL21	1	-	KPC-2
GCA_016680915.1	China	East Asia	ST11	iuc 1	-	rmp 1; KpVP-1,-	rmpA2_3-47%	KL64	1	-	KPC-2
GCA_016680955.1	China	East Asia	ST11	iuc 1	-	rmp 1; KpVP-1 (truncated)	rmpA2_3-47%	KL64	1	-	KPC-2
GCA_016680975.1	China	East Asia	ST11	iuc 1	-	-	rmpA2_3-47%	KL21	1	-	KPC-2
GCA_016722865.1	China	East Asia	ST11	iuc 1	-	rmp 1; KpVP-1,-	rmpA2_3-47%	KL64	1	CTX-M-65	KPC-2
GCA_016722885.1	China	East Asia	ST11	iuc 1	-	rmp 1; KpVP-1,-	rmpA2_3-47%	KL64	1	CTX-M-65	KPC-2
GCA_016745865.1	China	East Asia	ST11	iuc 1	-	-	rmpA2_3-47%	KL64	1	CTX-M-65	-
GCA_016748155.1	China	East Asia	ST86	iuc 1	iro 1	rmp 1; KpVP-1,-	rmpA2_9*-54%	KL2	1	-	KPC-2
GCA_016748215.1	China	East Asia	ST86	iuc 1	iro 1	rmp 1; KpVP-1,-	rmpA2_9*-54%	KL2	1	-	KPC-2
GCA_016748235.1	China	East Asia	ST11	iuc 1	-	rmp 1; KpVP-1,-	rmpA2_3-47%	KL47	1	CTX-M-65	KPC-2
GCA_016748255.1	China	East Asia	ST437	-	-	-	-	KL36	0.597	CTX-M-55;CTX-M-65*	KPC-2
GCA_016748285.1	China	East Asia	ST11	iuc 1	-	-	rmpA2_9	KL47	1	CTX-M-147*?	KPC-2
GCA_016748295.1	China	East Asia	ST11	iuc 1	-	rmp unknown	rmpA2_9	KL47	1	CTX-M-147?	KPC-2
GCA_016748375.1	China	East Asia	ST11	iuc 1	-	rmp 1; KpVP-1,-	rmpA2_3-47%	KL64	1	CTX-M-65;SHV-12	KPC-2
GCA_016748455.1	China	East Asia	ST11	iuc 1	-	-	rmpA2_9	KL47	1	CTX-M-104*?	KPC-2
GCA_016748475.1	China	East Asia	ST11	iuc 1	-	rmp 1; KpVP-1,-	rmpA2_3-47%	KL64	1	CTX-M-65;SHV-12	KPC-2
GCA_016748515.1	China	East Asia	ST11	iuc 1	-	rmp 1; KpVP-1,-	rmpA2_3-47%	KL64	1	CTX-M-65;SHV-12	KPC-2
GCA_016748535.1	China	East Asia	ST11	iuc 1	-	rmp 1; KpVP-1,-	rmpA2_3-47%	KL64	1	CTX-M-65;SHV-12	KPC-2
GCA_016748605.1	China	East Asia	ST11	iuc 1	-	rmp 1; KpVP-1,-	rmpA2_3-47%	KL64	1	CTX-M-65;SHV-12	KPC-2
GCA_016748625.1	China	East Asia	ST11	iuc 1	-	rmp 1; KpVP-1,-	rmpA2_3-47%	KL64	1	CTX-M-65;SHV-12	KPC-2
GCA_016748695.1	China	East Asia	ST11	iuc 1	iro 1 (incomplete)	-	rmpA2_8*	KL64	1	CTX-M-3	KPC-2
GCA_016748715.1	China	East Asia	ST11	iuc 1	-	-	rmpA2_3-47%	KL64	1	CTX-M-65;SHV-12	KPC-2
GCA_016748725.1	China	East Asia	ST11	iuc 1	iro 1 (incomplete)	-	rmpA2_8*	KL64	1	CTX-M-3	KPC-2
GCA_016748735.1	China	East Asia	ST11	iuc 1	-	rmp 1; KpVP-1,-	rmpA2_3-47%	KL64	1	CTX-M-65;SHV-12	KPC-2
GCA_016748835.1	China	East Asia	ST11	iuc 1	-	rmp 1; KpVP-1,-	rmpA2_3-47%	KL64	1	CTX-M-65;SHV-12	KPC-2
GCA_016748845.1	China	East Asia	ST11	iuc 1	-	rmp 1; KpVP-1,-	rmpA2_3-47%	KL64	1	CTX-M-65;SHV-12	KPC-2
GCA_016748875.1	China	East Asia	ST11	iuc 1	-	rmp unknown	rmpA2_3-47%	KL64	1	CTX-M-3;CTX-M-65;SHV-12	KPC-2
GCA_016748895.1	China	East Asia	ST11	iuc 1	iro 1 (incomplete)	-	rmpA2_8*	KL64	1	CTX-M-3;CTX-M-65	KPC-2
GCA_016748915.1	China	East Asia	ST11	iuc 1	-	rmp 1; KpVP-1,-	rmpA2_3-47%	KL64	1	CTX-M-65;SHV-12	KPC-2
GCA_016748955.1	China	East Asia	ST11	iuc 1	-	rmp 1; KpVP-1,-	rmpA2_3-47%	KL64	1	CTX-M-65;SHV-12	KPC-2
GCA_016749055.1	China	East Asia	ST86	iuc 1 (incomplete)	iro 1 (incomplete)	rmp 1; KpVP-1 (truncated)	rmpA2_9*-54%	unknown (KL64)	1	CTX-M-65	KPC-2
GCA_016749145.1	China	East Asia	ST11	iuc 1	-	rmp 1; KpVP-1,-	rmpA2_3-47%	KL64	1	CTX-M-65;SHV-12	KPC-2
GCA_016749195.1	China	East Asia	ST11	iuc 1	-	rmp unknown	rmpA2_4*-47%	KL47	1	CTX-M-104*?	KPC-2
GCA_016749245.1	China	East Asia	ST11	iuc 1	-	rmp 1; KpVP-1 (truncated),-	rmpA2_3-47%	KL64	0.4652	-	KPC-2
GCA_016749255.1	China	East Asia	ST11	iuc 1	-	rmp 1; KpVP-1,-	rmpA2_3-47%	KL64	1	CTX-M-65;SHV-12	KPC-2
GCA_016749295.1	China	East Asia	ST11	iuc 1	iro 1	rmp 1; KpVP-1,-	rmpA2_3-47%	KL64	1	CTX-M-3;CTX-M-65	KPC-2
GCA_016749315.1	China	East Asia	ST11	iuc 1	-	-	rmpA2_3-47%	KL64	1	CTX-M-65;SHV-12	KPC-2
GCA_016749355.1	China	East Asia	ST11	iuc 1	-	-	rmpA2_3-47%	KL64	1	CTX-M-65;SHV-12	KPC-2
GCA_016749435.1	China	East Asia	ST11	iuc 1	iro 1 (incomplete)	-	rmpA2_8*	KL64	1	-	KPC-2
GCA_016749475.1	China	East Asia	ST11	iuc 1	-	rmp 1; KpVP-1 (truncated),-	rmpA2_3-47%	KL64	0	-	KPC-2
GCA_016749555.1	China	East Asia	ST11	iuc 1	-	-	rmpA2_9	KL47	1	CTX-M-9*?	KPC-2
GCA_016749605.1	China	East Asia	ST11	iuc 1	iro 1 (incomplete)	-	rmpA2_8*	KL64	1	CTX-M-65	KPC-2
GCA_016749635.1	China	East Asia	ST11	iuc 1	-	-	rmpA2_9	KL47	1	CTX-M-9*?	KPC-2
GCA_016749695.1	China	East Asia	ST11	iuc 1	-	rmp 1; KpVP-1,-	rmpA2_3-47%	KL64	1	CTX-M-65;SHV-12	KPC-2
GCA_016749735.1	China	East Asia	ST11	iuc 1	-	-	rmpA2_3-47%	KL64	1	CTX-M-65;SHV-12	KPC-2
GCA_016749755.1	China	East Asia	ST11	iuc 1	-	rmp 1; KpVP-1,-	rmpA2_3-47%	KL64	1	CTX-M-65;SHV-12	KPC-2
GCA_016749795.1	China	East Asia	ST11	iuc 1	-	-	rmpA2_9	KL47	1	CTX-M-14^	KPC-2
GCA_016749835.1	China	East Asia	ST11	iuc 1	-	rmp 1; KpVP-1,-	rmpA2_3-47%	KL64	1	CTX-M-65;SHV-12	KPC-2
GCA_016749855.1	China	East Asia	ST11	-	-	-	rmpA2_9*-0%	KL47	1	CTX-M-14^	KPC-2
GCA_016749865.1	China	East Asia	ST11	iuc 1	-	-	rmpA2_9	KL47	1	CTX-M-104*?;CTX-M-15	KPC-2
GCA_016749905.1	China	East Asia	ST11	iuc 1	-	-	rmpA2_3-47%	KL64	1	CTX-M-65;SHV-12	KPC-2
GCA_016749955.1	China	East Asia	ST11	iuc 1	-	rmp 1; KpVP-1,-	rmpA2_3-47%	unknown (KL64)	1	CTX-M-65;SHV-12	KPC-2
GCA_016749975.1	China	East Asia	ST11	iuc 1	-	-	rmpA2_3-47%	KL64	0	CTX-M-65;SHV-12	KPC-2
GCA_016749995.1	China	East Asia	ST11	iuc 1	iro 1	rmp 1; KpVP-1 (truncated),-	rmpA2_3-47%	KL64	1	CTX-M-65;SHV-12	KPC-2
GCA_016750015.1	China	East Asia	ST11	iuc 1	-	-	rmpA2_3-47%	KL64	1	CTX-M-65;SHV-12	KPC-2
GCA_016750035.1	China	East Asia	ST11	iuc 1	-	-	rmpA2_9	KL47	1	CTX-M-104*?	KPC-2
GCA_016750055.1	China	East Asia	ST11	iuc 1	-	rmp 1; KpVP-1,-	rmpA2_3-47%	KL64	1	CTX-M-65;SHV-12	KPC-2
GCA_016750115.1	China	East Asia	ST11	iuc 1	iro 1 (incomplete)	-	rmpA2_8*	KL64	1	CTX-M-65	KPC-2
GCA_016750175.1	China	East Asia	ST11	iuc 1	iro 1 (incomplete)	rmp unknown	rmpA2_8*	KL64	1	CTX-M-65	KPC-2
GCA_016750195.1	China	East Asia	ST11	iuc 1	-	-	rmpA2_3-47%	KL64	1	CTX-M-65;SHV-12	KPC-2
GCA_016750205.1	China	East Asia	ST86	iuc 1	iro 1	rmp 1; KpVP-1	-	KL2	1	-	KPC-2
GCA_016750235.1	China	East Asia	ST11	iuc 1	-	-	rmpA2_9	KL47	1	CTX-M-65?	KPC-2
GCA_016750245.1	China	East Asia	ST11	iuc 1	-	-	rmpA2_9	KL47	1	CTX-M-65?	KPC-2
GCA_016750275.1	China	East Asia	ST11	iuc 1	iro 1 (incomplete)	-	rmpA2_8*	KL64	1	CTX-M-3	KPC-2
GCA_016750295.1	China	East Asia	ST11	iuc 1	-	-	rmpA2_8-60%	KL47	0	CTX-M-65	KPC-2
GCA_016750315.1	China	East Asia	ST11	iuc 1	iro 1 (incomplete)	-	rmpA2_8*	KL64	1	CTX-M-3	KPC-2
GCA_016750355.1	China	East Asia	ST11	iuc 1	iro 1 (incomplete)	-	rmpA2_8*	KL64	1	CTX-M-3	KPC-2
GCA_016750365.1	China	East Asia	ST11	iuc 1	iro 1 (incomplete)	-	rmpA2_8*	KL64	1	CTX-M-24;CTX-M-3	KPC-2
GCA_016750395.1	China	East Asia	ST11	iuc 1	iro 1 (incomplete)	-	rmpA2_8*	KL64	1	CTX-M-3	KPC-2
GCA_016750455.1	China	East Asia	ST11	iuc 1	iro 1 (incomplete)	-	rmpA2_8*	KL64	1	CTX-M-3	KPC-2
GCA_016750465.1	China	East Asia	ST437	iuc 3	-	-	-	KL36	0.289	-	KPC-2
GCA_016750535.1	China	East Asia	ST11	iuc 1	-	rmp 1; KpVP-1,-	rmpA2_3-47%	KL64	1	CTX-M-65;SHV-12^	KPC-2
GCA_016750555.1	China	East Asia	ST11	iuc 1	iro 1 (incomplete)	-	rmpA2_8*	KL64	1	CTX-M-3	KPC-2
GCA_016750575.1	China	East Asia	ST11	iuc 1	-	rmp 1; KpVP-1,-	rmpA2_3-47%	KL64	1	CTX-M-65	KPC-2
GCA_016750595.1	China	East Asia	ST11	iuc 1	-	rmp 1; KpVP-1,-	rmpA2_3-47%	KL64	1	CTX-M-65;SHV-12	KPC-2
GCA_016750615.1	China	East Asia	ST11	iuc 1	-	rmp 1; KpVP-1,-	rmpA2_3-47%	KL64	1	CTX-M-65;SHV-12	KPC-2
GCA_016750625.1	China	East Asia	ST11	iuc 1	-	rmp 1; KpVP-1 (truncated),-	rmpA2_3-47%	KL64	1	CTX-M-65	KPC-2
GCA_016750655.1	China	East Asia	ST11	iuc 1	-	rmp 1; KpVP-1,-	rmpA2_3-47%	KL64	1	CTX-M-65;SHV-12	KPC-2
GCA_016750675.1	China	East Asia	ST11	iuc 1	iro 1 (incomplete)	-	rmpA2_8*	KL64	1	CTX-M-3	KPC-2
GCA_016750685.1	China	East Asia	ST11	iuc 1	iro 1 (incomplete)	-	rmpA2_8*	KL64	1	CTX-M-3;CTX-M-65	KPC-2
GCA_016750715.1	China	East Asia	ST11	iuc 1	iro 1 (incomplete)	-	rmpA2_8*	KL64	1	CTX-M-3	KPC-2
GCA_016750775.1	China	East Asia	ST11	iuc 1	iro 1 (incomplete)	-	rmpA2_8*	KL64	1	CTX-M-3	KPC-2
GCA_016750785.1	China	East Asia	ST11	iuc 1	-	rmp 1; KpVP-1,-	rmpA2_9	KL47	1	CTX-M-65?	KPC-2
GCA_016750815.1	China	East Asia	ST11	iuc 1	iro 1 (incomplete)	-	rmpA2_8*	KL64	1	CTX-M-3	KPC-2
GCA_016750835.1	China	East Asia	ST11	iuc 1	iro 1 (incomplete)	-	rmpA2_8*	KL64	1	CTX-M-3	KPC-2
GCA_016750855.1	China	East Asia	ST11	iuc 1	iro 1 (incomplete)	-	rmpA2_8*	KL64	1	CTX-M-3	KPC-2
GCA_016750875.1	China	East Asia	ST11	iuc 1	iro 1 (incomplete)	-	rmpA2_8*	KL64	1	CTX-M-3;CTX-M-65	KPC-2
GCA_016750895.1	China	East Asia	ST11	iuc 1	-	rmp 1; KpVP-1 (truncated),-	rmpA2_3-47%	KL64	1	CTX-M-65	KPC-2
GCA_016750905.1	China	East Asia	ST11	iuc 1	iro 1 (incomplete)	-	rmpA2_8*	KL64	1	CTX-M-3	KPC-2
GCA_016750975.1	China	East Asia	ST11	iuc 1	-	rmp 1; KpVP-1,-	rmpA2_3-47%	KL64	1	CTX-M-65;SHV-12	KPC-2
GCA_016750995.1	China	East Asia	ST11	iuc 1	-	rmp 1; KpVP-1,-	rmpA2_3-47%	KL64	1	CTX-M-3;CTX-M-65	KPC-2
GCA_016751005.1	China	East Asia	ST11	iuc 1	-	-	rmpA2_9	KL47	1	CTX-M-65	KPC-2
GCA_016751035.1	China	East Asia	ST11	iuc 1	-	-	rmpA2_9	KL47	1	CTX-M-65	KPC-2
GCA_016751045.1	China	East Asia	ST11	iuc 1	-	-	rmpA2_3-47%	KL64	1	CTX-M-65;SHV-12^	KPC-2
GCA_016751075.1	China	East Asia	ST11	iuc 1	-	-	rmpA2_3-47%	KL64	1	CTX-M-65	KPC-2
GCA_016751095.1	China	East Asia	ST11	iuc 1	-	-	rmpA2_3-47%	KL64	1	CTX-M-65	KPC-2
GCA_016751115.1	China	East Asia	ST11	iuc 1	-	-	rmpA2_3-47%	KL64	1	CTX-M-65	KPC-2
GCA_016751135.1	China	East Asia	ST11	iuc 1	-	-	rmpA2_9	KL47	1	CTX-M-65?	KPC-2
GCA_016751165.1	China	East Asia	ST11	iuc 1	-	rmp 1; KpVP-1,-	rmpA2_3-47%	KL64	0	CTX-M-65	KPC-2
GCA_016751195.1	China	East Asia	ST11	iuc 1	iro 1 (incomplete)	-	rmpA2_8*	KL64	1	CTX-M-3	KPC-2
GCA_016751215.1	China	East Asia	ST11	iuc 1	-	-	rmpA2_3-47%	KL64	1	CTX-M-65	KPC-2
GCA_016751235.1	China	East Asia	ST11	iuc 1	-	-	rmpA2_3-47%	KL64	1	CTX-M-65	KPC-2
GCA_016751255.1	China	East Asia	ST11	iuc 1	-	-	rmpA2_3-47%	KL64	1	CTX-M-65	KPC-2
GCA_016751275.1	China	East Asia	ST11	iuc 1	-	rmp 1; KpVP-1,-	rmpA2_3-47%	KL64	1	CTX-M-65	KPC-2
GCA_016751295.1	China	East Asia	ST11	iuc 1	-	-	rmpA2_3-47%	KL64	1	CTX-M-65	KPC-2
GCA_016751305.1	China	East Asia	ST11	iuc 1	iro 1 (incomplete)	-	rmpA2_8*	KL64	1	CTX-M-3	KPC-2
GCA_016751335.1	China	East Asia	ST11	iuc 1	-	-	rmpA2_3-47%	KL64	1	CTX-M-65;SHV-12	KPC-2
GCA_016751375.1	China	East Asia	ST11	iuc 1	iro 1 (incomplete)	-	rmpA2_8*	KL64	1	CTX-M-3;CTX-M-65	KPC-2
GCA_016751395.1	China	East Asia	ST11	iuc 1	-	rmp 1; KpVP-1,-	rmpA2_3-47%	KL64	1	CTX-M-65?;SHV-12	KPC-2
GCA_016751415.1	China	East Asia	ST11	iuc 1	iro 1 (incomplete)	-	rmpA2_8*	KL64	1	CTX-M-3	KPC-2
GCA_016751435.1	China	East Asia	ST11	iuc 1	-	-	rmpA2_3-47%	KL64	1	CTX-M-65	KPC-2
GCA_016751455.1	China	East Asia	ST11	iuc 1	-	-	rmpA2_3-47%	KL64	1	CTX-M-65;SHV-12	KPC-2
GCA_016751475.1	China	East Asia	ST11	iuc 1	-	-	rmpA2_9	KL47	0	CTX-M-65?	KPC-2
GCA_016751495.1	China	East Asia	ST11	iuc 1	-	-	rmpA2_3-47%	KL64	1	CTX-M-65;SHV-12	KPC-2
GCA_016751505.1	China	East Asia	ST11	iuc 1	iro 1 (incomplete)	-	rmpA2_8*	KL64	1	CTX-M-3	KPC-2
GCA_016751535.1	China	East Asia	ST11	iuc 1	-	-	rmpA2_8-60%	KL47	1	CTX-M-65;SHV-12^	KPC-2
GCA_016751555.1	China	East Asia	ST11	iuc 1	iro 1 (incomplete)	-	rmpA2_8*	KL64	1	CTX-M-3	KPC-2
GCA_016751575.1	China	East Asia	ST11	iuc 1	-	-	rmpA2_3-47%	KL64	1	CTX-M-65;SHV-12	KPC-2
GCA_016751595.1	China	East Asia	ST11	iuc 1	iro 1 (incomplete)	-	rmpA2_8*	KL64	1	CTX-M-3	KPC-2
GCA_016751615.1	China	East Asia	ST11	iuc 1	-	-	rmpA2_3-47%	KL64	1	CTX-M-65	KPC-2
GCA_016751635.1	China	East Asia	ST11	iuc 1	iro 1 (incomplete)	-	rmpA2_8*	KL64	1	CTX-M-3	KPC-2
GCA_016751645.1	China	East Asia	ST11	iuc 1	-	rmp 1; KpVP-1 (truncated),-	rmpA2_3-47%	KL64	1	-	KPC-2
GCA_016751675.1	China	East Asia	ST11	iuc 1	-	-	rmpA2_9	KL47	1	CTX-M-65?	KPC-2
GCA_016751695.1	China	East Asia	ST11	iuc 1	-	-	rmpA2_3-47%	KL64	1	CTX-M-65	KPC-2
GCA_016751705.1	China	East Asia	ST11	iuc 1	-	-	rmpA2_4*-47%	KL47	1	CTX-M-65?	KPC-2
GCA_016751735.1	China	East Asia	ST11	iuc 1	iro 1 (incomplete)	-	rmpA2_8*	KL64	0	CTX-M-3	KPC-2
GCA_016751775.1	China	East Asia	ST11	iuc 1	iro 1 (incomplete)	-	rmpA2_8*	KL64	1	CTX-M-3	KPC-2
GCA_016751795.1	China	East Asia	ST11	iuc 1	-	rmp 1; KpVP-1 (truncated),-	rmpA2_3-47%	KL64	1	CTX-M-65;SHV-12	KPC-2
GCA_016751815.1	China	East Asia	ST11	iuc 1	iro 1 (incomplete)	-	rmpA2_8*	KL64	1	CTX-M-3	KPC-2
GCA_016751835.1	China	East Asia	ST11	iuc 1	iro 1 (incomplete)	-	rmpA2_8*	KL64	1	CTX-M-3	KPC-2
GCA_016751855.1	China	East Asia	ST11	iuc 1	-	-	rmpA2_9	KL47	1	CTX-M-65?	KPC-2
GCA_016751875.1	China	East Asia	ST11	iuc 1	iro 1 (incomplete)	-	rmpA2_8*	KL64	1	CTX-M-3	KPC-2
GCA_016751905.1	China	East Asia	ST11	iuc 1	-	-	rmpA2_9	KL47	1	CTX-M-65?	KPC-2
GCA_016751955.1	China	East Asia	ST11	iuc 1	iro 1 (incomplete)	-	rmpA2_8*	KL64	1	CTX-M-3	KPC-2
GCA_016751995.1	China	East Asia	ST11	iuc 1	-	-	rmpA2_3-47%	KL64	1	CTX-M-65	KPC-2
GCA_016752005.1	China	East Asia	ST11	iuc 1	-	-	rmpA2_9	KL47	1	CTX-M-65	KPC-2
GCA_016752025.1	China	East Asia	ST11	iuc 1	iro 1 (incomplete)	-	rmpA2_8*	KL64	1	CTX-M-3	KPC-2
GCA_016752055.1	China	East Asia	ST11	iuc 1	iro 1 (incomplete)	-	rmpA2_8*	KL64	1	CTX-M-14;CTX-M-3	KPC-2
GCA_016752075.1	China	East Asia	ST11	iuc 1	-	rmp 1; KpVP-1,-	rmpA2_3-47%	KL64	1	CTX-M-65	KPC-2
GCA_016752095.1	China	East Asia	ST11	iuc 1	iro 1 (incomplete)	-	rmpA2_8*	KL64	0	CTX-M-3	KPC-2
GCA_016752125.1	China	East Asia	ST11	iuc 1	iro 1 (incomplete)	-	rmpA2_8*	KL64	1	CTX-M-3	KPC-2
GCA_016752155.1	China	East Asia	ST11	iuc 1	-	-	rmpA2_9	KL47	1	CTX-M-65?	KPC-2
GCA_016752175.1	China	East Asia	ST11	iuc 1	-	-	rmpA2_9	KL47	1	CTX-M-65	KPC-2
GCA_016752195.1	China	East Asia	ST11	iuc 1	-	-	rmpA2_9	KL47	1	CTX-M-65?	KPC-2
GCA_016752235.1	China	East Asia	ST11	iuc 1	-	rmp 1; KpVP-1 (truncated),-	rmpA2_3-47%	KL28	1	CTX-M-65;SHV-12	KPC-2
GCA_016752295.1	China	East Asia	ST11	iuc 1	-	rmp 1; KpVP-1 (truncated),-	rmpA2_3-47%	KL28	1	CTX-M-65;SHV-12	KPC-2
GCA_016752465.1	China	East Asia	ST11	iuc 1	iro 1 (incomplete) (truncated)	rmp 1; KpVP-1,-	rmpA2_6-60%	KL47	0	-	KPC-2
GCA_016752555.1	China	East Asia	ST11	iuc 1	-	rmp 1; KpVP-1,-	rmpA2_3-47%	KL64	1	CTX-M-65;SHV-12	KPC-2
GCA_016752635.1	China	East Asia	ST11	iuc 1	-	rmp 1; KpVP-1,-	rmpA2_3-47%	KL64	1	CTX-M-65;SHV-12	KPC-2
GCA_016752665.1	China	East Asia	ST11	iuc 1	-	rmp 1; KpVP-1,-	rmpA2_3-47%	KL64	1	CTX-M-65;SHV-12	KPC-2
GCA_016752675.1	China	East Asia	ST11	iuc 1	-	rmp 1; KpVP-1 (truncated),-	rmpA2_3-47%	KL64	1	CTX-M-65;SHV-12	KPC-2
GCA_016752695.1	China	East Asia	ST11	iuc 1	-	rmp 1; KpVP-1 (truncated),-	rmpA2_3-47%	KL64	0	CTX-M-65;SHV-12	KPC-2
GCA_016752785.1	China	East Asia	ST11	iuc 1	-	rmp 1; KpVP-1 (truncated),-	rmpA2_3-47%	KL64	1	CTX-M-65;SHV-12	KPC-2
GCA_016752815.1	China	East Asia	ST11	iuc 1	-	rmp 1; KpVP-1 (truncated),-	rmpA2_3-47%	KL64	1	CTX-M-65;SHV-12	KPC-2
GCA_016752855.1	China	East Asia	ST11	iuc 1	-	rmp 1; KpVP-1,-	rmpA2_3-47%	KL64	1	CTX-M-65;SHV-12	KPC-2
GCA_016752895.1	China	East Asia	ST11	iuc 1	-	rmp 1; KpVP-1,-	rmpA2_3-47%	KL64	1	CTX-M-65;SHV-12	KPC-2
GCA_016752975.1	China	East Asia	ST11	iuc 1	-	rmp 1; KpVP-1,-	rmpA2_3-47%	KL64	1	CTX-M-65;SHV-12	KPC-2
GCA_016752985.1	China	East Asia	ST11	iuc 1 (incomplete) (truncated)	-	rmp 1; KpVP-1	-	KL64	1	CTX-M-65;SHV-12	KPC-2
GCA_016753035.1	China	East Asia	ST11	iuc 1	-	rmp 1; KpVP-1,-	rmpA2_3-47%	KL64	1	CTX-M-65;SHV-12	KPC-2
GCA_016753055.1	China	East Asia	ST11	iuc 1	iro 1	rmp 1; KpVP-1,-	rmpA2_3-47%	KL64	1	CTX-M-65	KPC-2
GCA_016753095.1	China	East Asia	ST11	iuc 1	-	rmp 1; KpVP-1,-	rmpA2_3-47%	KL64	1	CTX-M-65;SHV-12	KPC-2
GCA_016753105.1	China	East Asia	ST11	iuc 1	-	-	rmpA2_8-60%	KL47	1	CTX-M-15;CTX-M-65	KPC-2
GCA_016753135.1	China	East Asia	ST11	iuc 1	iro 1	rmp 1; KpVP-1 (truncated),-	rmpA2_3-47%	KL64	1	CTX-M-65;SHV-12	KPC-2
GCA_016753175.1	China	East Asia	ST395	iuc 1	-	-	rmpA2_8-60%	KL3	1	-	KPC-2
GCA_016753215.1	China	East Asia	ST11	iuc 1	iro 1	rmp 1; KpVP-1 (truncated),-	rmpA2_3-47%	KL64	1	CTX-M-65	KPC-2
GCA_016753255.1	China	East Asia	ST11	iuc 1	-	rmp 1; KpVP-1,-	rmpA2_3-47%	KL64	1	SHV-12^	KPC-2
GCA_016753265.1	China	East Asia	ST11	iuc 5	-	-	-	KL47	0	SHV-12^	KPC-2
GCA_016753285.1	China	East Asia	ST11	iuc 1	-	-	-	KL47	1	CTX-M-65	KPC-2
GCA_016753315.1	China	East Asia	ST11	iuc 1	iro 1	rmp 1; KpVP-1,-	rmpA2_3-47%	KL64	1	CTX-M-65	KPC-2
GCA_016753335.1	China	East Asia	ST11	iuc 1	iro 1 (incomplete)	-	rmpA2_3-47%	KL64	1	CTX-M-65	KPC-2
GCA_016753365.1	China	East Asia	ST11	iuc 1	iro 1	-	-	KL64	0.9462	CTX-M-65	KPC-2
GCA_016753415.1	China	East Asia	ST11	iuc 1	iro 1	rmp 1; KpVP-1 (truncated),-	rmpA2_3-47%	KL64	1	CTX-M-65	KPC-2
GCA_016753425.1	China	East Asia	ST11	iuc 5	-	-	-	unknown (KL47)	0	CTX-M-15;CTX-M-65	KPC-2
GCA_016753455.1	China	East Asia	ST11	iuc 1	iro 1	rmp 1; KpVP-1,-	rmpA2_3-47%	KL64	1	CMY-42;CTX-M-65	KPC-2
GCA_016753475.1	China	East Asia	ST11	iuc 1	-	-	-	KL47	1	CTX-M-65	KPC-2
GCA_016753485.1	China	East Asia	ST11	iuc 1	iro 1	rmp 1; KpVP-1 (truncated),-	rmpA2_3-47%	KL64	1	CTX-M-65;SHV-12	KPC-2
GCA_016753495.1	China	East Asia	ST11	iuc 1	iro 1	rmp 1; KpVP-1,-	rmpA2_3-47%	KL64	1	CTX-M-65	KPC-2
GCA_016753505.1	China	East Asia	ST11	iuc 1	iro 1 (incomplete)	-	rmpA2_3-47%	KL64	1	CTX-M-65;SHV-12	KPC-2
GCA_016753555.1	China	East Asia	ST11	iuc 1	iro 1 (incomplete)	-	rmpA2_3-47%	KL64	1	CTX-M-65;SHV-12^	KPC-2
GCA_016753575.1	China	East Asia	ST11	iuc 1	-	-	rmpA2_8-60%	unknown (KL107)	1	CTX-M-15;CTX-M-65	KPC-2
GCA_016753615.1	China	East Asia	ST11	iuc 1	iro 1 (incomplete)	-	rmpA2_3-47%	KL64	1	CTX-M-65;SHV-12	KPC-2
GCA_016753635.1	China	East Asia	ST11	iuc 1	iro 1	rmp 1; KpVP-1 (truncated),-	rmpA2_3-47%	KL64	1	CTX-M-65	KPC-2
GCA_016753655.1	China	East Asia	ST15	iuc 1 (incomplete)	-	-	rmpA2_8-60%	KL19	1	CTX-M-15	KPC-2
GCA_016753675.1	China	East Asia	ST11	iuc 1	iro 1	rmp 1; KpVP-1,-	rmpA2_3-47%	KL64	1	CTX-M-65	KPC-2
GCA_016753695.1	China	East Asia	ST11	iuc 1	iro 1	rmp 1; KpVP-1,-	rmpA2_3-47%	KL64	1	CTX-M-65	KPC-2
GCA_016753715.1	China	East Asia	ST11	iuc 1	-	-	rmpA2_8-60%	KL47	1	CTX-M-15;CTX-M-65	KPC-2
GCA_016753735.1	China	East Asia	ST395	iuc 1	-	-	rmpA2_8-60%	KL3	1	-	KPC-2
GCA_016753755.1	China	East Asia	ST11	iuc 1	iro 1 (incomplete)	rmp 1; KpVP-1 (truncated),-	rmpA2_3-47%	KL64	1	CTX-M-65	KPC-2
GCA_016753765.1	China	East Asia	ST11	iuc 1	iro 1	rmp 1; KpVP-1 (truncated),-	rmpA2_3-47%	KL64	1	CTX-M-65;SHV-12	KPC-2
GCA_016753795.1	China	East Asia	ST48	iuc 1	-	-	rmpA2_8-60%	KL62	1	CTX-M-15	KPC-2
GCA_016753815.1	China	East Asia	ST11	iuc 1	iro 1 (truncated)	rmp unknown,-	rmpA2_3-47%	KL64	1	CTX-M-65;SHV-12	KPC-2
GCA_016753835.1	China	East Asia	ST11	iuc 1	iro 1	rmp 1; KpVP-1 (truncated),-	rmpA2_3-47%	KL64	1	CTX-M-65	KPC-2
GCA_016753855.1	China	East Asia	ST11	iuc 1	iro 1 (incomplete)	-	rmpA2_3-47%	KL64	1	CTX-M-65	KPC-2
GCA_016753875.1	China	East Asia	ST11	iuc 1	iro 1	rmp 1; KpVP-1 (truncated)	rmpA2_3-47%	KL64	1	CTX-M-65	KPC-2
GCA_016753915.1	China	East Asia	ST15	iuc 1	-	-	rmpA2_8-60%	KL19	1	CTX-M-15	KPC-2
GCA_016753935.1	China	East Asia	ST11	iuc 1	iro 1	rmp 1; KpVP-1 (truncated),-	rmpA2_3-47%	KL64	1	CTX-M-65;SHV-12	KPC-2
GCA_016753955.1	China	East Asia	ST11	iuc 1	iro 1 (incomplete)	-	rmpA2_3-47%	KL64	1	CTX-M-65	KPC-2
GCA_016753975.1	China	East Asia	ST11	iuc 1	iro 1	rmp 1; KpVP-1,-	rmpA2_3-47%	KL64	1	CTX-M-65	KPC-2
GCA_016753995.2	China	East Asia	ST11	iuc 1	iro 1	rmp 1; KpVP-1	rmpA2_3-47%	KL64	1	CMY-42;CTX-M-65;CTX-M-65	KPC-2
GCA_016754005.1	China	East Asia	ST11	iuc 1	iro 1 (incomplete)	-	rmpA2_3-47%	KL64	1	CTX-M-65	KPC-2
GCA_016754035.1	China	East Asia	ST11	iuc 1	iro 1	rmp 1; KpVP-1 (truncated),-	rmpA2_3-47%	KL64	1	CTX-M-65;SHV-12	KPC-2
GCA_016754055.1	China	East Asia	ST11	iuc 1	iro 1	rmp 1; KpVP-1 (truncated),-	rmpA2_3-47%	KL64	1	CTX-M-65	KPC-2
GCA_016754075.1	China	East Asia	ST11	iuc 1	-	rmp 1; KpVP-1,-	rmpA2_3-47%	KL64	1	CTX-M-65;SHV-12	KPC-2
GCA_016754095.1	China	East Asia	ST11	iuc 1	-	-	rmpA2_8-60%	KL47	1	CTX-M-14	KPC-2
GCA_016754115.1	China	East Asia	ST11	iuc 1	iro 1 (incomplete) (truncated)	rmp 1; KpVP-1,-	rmpA2_6-60%	KL47	1	CTX-M-65	KPC-2
GCA_016754255.1	China	East Asia	ST11	iuc 1	iro 1 (incomplete) (truncated)	rmp 1; KpVP-1,-	rmpA2_6-60%	KL47	1	CTX-M-65	KPC-2
GCA_016754265.1	China	East Asia	ST11	iuc 1	iro 1 (incomplete) (truncated)	rmp 1; KpVP-1,-	rmpA2_6-60%	KL47	1	CTX-M-65	KPC-2
GCA_016754295.1	China	East Asia	ST11	iuc 1	-	-	rmpA2_8-60%	KL47	1	CTX-M-65	KPC-2
GCA_016754305.1	China	East Asia	ST11	iuc 1	iro 1 (incomplete) (truncated)	rmp 1; KpVP-1,-	rmpA2_6-60%	KL47	1	CTX-M-65	KPC-2
GCA_016754335.1	China	East Asia	ST11	iuc 1	iro 1 (incomplete) (truncated)	rmp 1; KpVP-1,-	rmpA2_6-60%	unknown (KL47)	1	CTX-M-65	KPC-2
GCA_016754355.1	China	East Asia	ST11	iuc 1	iro 1 (incomplete) (truncated)	rmp 1; KpVP-1,-	rmpA2_6-60%	KL47	1	CTX-M-3;CTX-M-65	KPC-2
GCA_016754375.1	China	East Asia	ST11	iuc 1	iro unknown	-	rmpA2_6-60%	KL47	1	CTX-M-3;CTX-M-65	KPC-2
GCA_016754395.1	China	East Asia	ST11	iuc 1	-	-	rmpA2_8-60%	KL47	0	CTX-M-65	KPC-2
GCA_016754415.1	China	East Asia	ST11	iuc 1	-	rmp 1; KpVP-1,-	rmpA2_3-47%	KL64	1	CTX-M-65;SHV-12	KPC-2
GCA_016754435.1	China	East Asia	ST11	iuc 1	-	rmp 1; KpVP-1,-	rmpA2_3-47%	KL64	1	CTX-M-65;SHV-12	KPC-2
GCA_016754575.1	China	East Asia	ST11	iuc 1	iro 1 (incomplete) (truncated)	rmp 1; KpVP-1,-	rmpA2_6-60%	KL47	1	CTX-M-65	KPC-2
GCA_016754595.1	China	East Asia	ST11	iuc 1	iro 1 (incomplete) (truncated)	rmp 1; KpVP-1,-	rmpA2_6-60%	KL47	1	CTX-M-65	KPC-2
GCA_016754615.1	China	East Asia	ST11	iuc 1	-	-,-	rmpA2_6-60%	KL47	1	CTX-M-65	KPC-2
GCA_016754635.1	China	East Asia	ST11	iuc 1	-	-,-	rmpA2_9	KL47	1	CTX-M-65	KPC-2
GCA_016754675.1	China	East Asia	ST11	iuc 1	iro 1 (incomplete) (truncated)	rmp 1; KpVP-1,-	rmpA2_6-60%	KL47	1	CTX-M-65	KPC-2
GCA_016754695.1	China	East Asia	ST11	iuc 1	iro 1 (incomplete) (truncated)	rmp 1; KpVP-1,-	rmpA2_6-60%	KL47	1	CTX-M-65	KPC-2
GCA_016754715.1	China	East Asia	ST11	iuc 1	iro 1 (incomplete) (truncated)	rmp 1; KpVP-1,-	rmpA2_6-60%	KL47	1	CTX-M-65	KPC-2
GCA_016754735.1	China	East Asia	ST11	iuc 1	-	-	-	KL47	1	CTX-M-65	KPC-2
GCA_016754745.1	China	East Asia	ST11	iuc 1	-	-	-	KL47	1	CTX-M-65	KPC-2
GCA_016754775.1	China	East Asia	ST11	iuc 1	-	-,-	rmpA2_6-60%	KL47	1	CTX-M-65	KPC-2
GCA_016754795.1	China	East Asia	ST11	iuc 1	iro 1 (incomplete) (truncated)	rmp 1; KpVP-1,-	rmpA2_6-60%	KL47	1	CTX-M-65	KPC-2
GCA_016754815.1	China	East Asia	ST11	iuc 1	iro 1 (incomplete) (truncated)	rmp 1; KpVP-1	-	KL47	1	CTX-M-65	KPC-2
GCA_016754835.1	China	East Asia	ST11	iuc 1	iro 1 (incomplete) (truncated)	rmp 1; KpVP-1,-	rmpA2_6-60%	KL47	1	CTX-M-65	KPC-2
GCA_016754875.1	China	East Asia	ST11	iuc 1	iro 1 (incomplete) (truncated)	rmp 1; KpVP-1,-	rmpA2_6-60%	KL47	1	CTX-M-65	KPC-2
GCA_016754895.1	China	East Asia	ST11	iuc 1	iro 1 (incomplete) (truncated)	rmp 1; KpVP-1,-	rmpA2_6-60%	KL47	1	CTX-M-65	KPC-2
GCA_016754915.1	China	East Asia	ST11	iuc 1	iro 1 (incomplete) (truncated)	rmp 1; KpVP-1,-	rmpA2_6-60%	KL47	1	CTX-M-65	KPC-2
GCA_016754925.1	China	East Asia	ST11	iuc 1	iro 1 (incomplete) (truncated)	rmp 1; KpVP-1,-	rmpA2_6-60%	KL47	1	CTX-M-65	KPC-2
GCA_016754955.1	China	East Asia	ST11	iuc 1	iro 1 (incomplete) (truncated)	rmp 1; KpVP-1,-	rmpA2_6-60%	KL47	1	CTX-M-65	KPC-2
GCA_016754995.1	China	East Asia	ST268	iuc 1	iro 1	rmp 1; KpVP-1	rmpA2_8*	KL20	1	-	KPC-2
GCA_016755055.1	China	East Asia	ST11	iuc 1	iro 1 (incomplete) (truncated)	rmp 1; KpVP-1,-	rmpA2_6-60%	KL47	1	CTX-M-65	KPC-2
GCA_016755075.1	China	East Asia	ST11	iuc 1	iro 1 (incomplete) (truncated)	rmp 1; KpVP-1,-	rmpA2_6-60%	KL47	1	CTX-M-65	KPC-2
GCA_016755315.1	China	East Asia	ST11	iuc 1	iro 1	rmp 1; KpVP-1 (truncated),-	rmpA2_3-47%	KL64	1	CTX-M-65	KPC-2
GCA_016755445.1	China	East Asia	ST11	iuc 3	-	-	-	KL47	0	CTX-M-65	KPC-2
GCA_016757945.1	China	East Asia	ST15	iuc 1	-	-	rmpA2_9	KL112	1	CTX-M-15	OXA-232
GCA_016757995.1	China	East Asia	ST15	iuc 1	-	-	rmpA2_9	KL112	1	CTX-M-15	OXA-232
GCA_016758015.1	China	East Asia	ST15	iuc 1	-	-	rmpA2_9	KL112	1	CTX-M-15	OXA-232
GCA_016761915.1	Bangladesh	South Asia	ST490	iuc 1	-	-	rmpA2_8*	KL3	1	CTX-M-15	NDM-5
GCA_016762085.1	Bangladesh	South Asia	ST65	iuc 1	iro 1	rmp 1; KpVP-1 (truncated),-	rmpA2_3-47%	KL2	1	-	-
GCA_016762295.1	Bangladesh	South Asia	ST420	iuc 1	iro 1	rmp 1; KpVP-1,-	rmpA2_3-47%	KL20	0	CTX-M-15	-
GCA_016762415.1	Bangladesh	South Asia	ST420	iuc 1	iro 1	rmp 1; KpVP-1 (truncated),-	rmpA2_5-54%	KL20	1	CTX-M-15	-
GCA_016762435.1	Bangladesh	South Asia	ST268	iuc 1	iro 1	rmp 1; KpVP-1	rmpA2_8*	KL20	1	-	-
GCA_016762555.1	Bangladesh	South Asia	ST65	iuc 1	iro 1	rmp 1; KpVP-1 (truncated),-	rmpA2_5-54%	KL2	1	-	-
GCA_016774435.1	China	East Asia	ST11	iuc 1	-	-	rmpA2_8*	KL64	1	CTX-M-27	KPC-2
GCA_016774455.1	China	East Asia	ST11	iuc 1,iuc 1	iro 1	-,rmp 1; KpVP-1 (truncated)	rmpA2_5-54%,rmpA2_5-54%	KL64	1	-	KPC-2
GCA_016792405.1	USA	North America	ST16	iuc 5	-	-	-	KL51	0	-	KPC-3
GCA_016795645.1	USA	North America	ST16	iuc 5	-	-	-	unknown (KL51)	0	SHV-12	KPC-3
GCA_016795925.1	USA	North America	ST231	iuc 5	-	-	-	KL51	0	-	OXA-232
GCA_016796225.1	USA	North America	ST16	iuc 5	-	-	-	unknown (KL51)	0	CTX-M-15	-
GCA_016797015.1	USA	North America	ST16	iuc 5	-	-	-	unknown (KL51)	0	CTX-M-15	KPC-3
GCA_016798265.1	USA	North America	ST16	iuc 5	-	-	-	unknown (KL51)	0	-	-
GCA_016800965.1	China	East Asia	ST290	iuc 3	iro 3 (truncated)	rmp 3; ICEKp1	-	KL21	0	-	-
GCA_016805745.1	Ecuador	South America	ST86	iuc 1	iro 1	-	-	unknown (KL2)	1	-	-
GCA_016812055.1	China	East Asia	ST11	iuc 1	-	-	rmpA2_3-47%	KL64	1	CTX-M-65;SHV-12	KPC-2;NDM-5
GCA_016859025.1	China	East Asia	ST23	iuc 1	iro 1	rmp 1; KpVP-1,-	rmpA2_5-54%	KL1	1	-	-
GCA_016879835.1	China	East Asia	ST391	iuc 3	-	-	-	KL30	0	CTX-M-24	-
GCA_016888185.1	Russia	Europe	ST23	iuc 1	iro 1	rmp 1; KpVP-1,-	rmpA2_5-54%	KL1	1	-	-
GCA_016888205.1	Russia	Europe	ST395	iuc 1	-	-	-	KL39	1	CTX-M-15	OXA-48
GCA_016916595.1	Russia	Europe	ST23	iuc 1	iro 1	rmp 1; KpVP-1,-	rmpA2_6*-55%	unknown (KL1)	1	-	-
GCA_016916615.1	Russia	Europe	ST23	iuc 1	iro 1	rmp 1; KpVP-1 (incomplete)	-	unknown (KL1)	1	-	-
GCA_016916655.1	Russia	Europe	ST23	iuc 1	iro 1	rmp 1; KpVP-1 (truncated),-	rmpA2_6-60%	KL1	1	-	-
GCA_016916695.1	Russia	Europe	ST39	iuc 1	-	-	-	KL23	1	CTX-M-15	KPC-2;OXA-48
GCA_016916715.1	Russia	Europe	ST218	iuc 1	iro 1	rmp 1; KpVP-1 (truncated),-	rmpA2_8*-0%	unknown (KL57)	1	-	-
GCA_016924055.1	China	East Asia	ST11	iuc 1	-	rmp 1; KpVP-1,-	rmpA2_3-47%	KL64	1	CTX-M-65	KPC-2
GCA_016924135.1	China	East Asia	ST11	iuc 1	-	rmp 1; KpVP-1 (truncated),-	rmpA2_3-47%	KL64	1	CTX-M-65	KPC-2
GCA_016924175.1	China	East Asia	ST11	iuc 1	-	rmp 1; KpVP-1,-	rmpA2_3-47%	KL64	1	-	KPC-2
GCA_016924215.1	China	East Asia	ST11	iuc 1	-	rmp 1; KpVP-1,-	rmpA2_3-47%	KL64	1	-	KPC-2
GCA_017084505.1	China	East Asia	ST412	iuc 1	iro 1	rmp 1; KpVP-1	rmpA2_8*	KL57	1	CTX-M-15	NDM-1
GCA_017310305.1	China	East Asia	ST383	iuc unknown	-	rmp 1; KpVP-1 (incomplete)	rmpA2_6*-47%	KL30	1	CTX-M-14^	OXA-48
GCA_017310365.1	China	East Asia	ST395	iuc 1	-	-	rmpA2_6*-62%	KL39	1	CTX-M-15;SHV-2	OXA-48
GCA_017310425.1	China	East Asia	ST147	iuc 1	-	rmp 1; KpVP-1 (incomplete)	rmpA2_6*-47%	KL81	1	CTX-M-14^;CTX-M-55	OXA-48
GCA_017311535.1	China	East Asia	ST383	iuc 1	-	rmp 1; KpVP-1 (incomplete),-	rmpA2_6*-47%	KL30	1	CTX-M-14^	OXA-48
GCA_017311595.1	China	East Asia	ST383	iuc 1	-	rmp 1; KpVP-1 (incomplete),-	rmpA2_6-60%	KL30	1	CTX-M-14^	OXA-48
GCA_017311605.1	China	East Asia	ST383	iuc 1	-	rmp 1; KpVP-1 (incomplete),-	rmpA2_6*-47%	KL30	1	CTX-M-14^	OXA-48
GCA_017311635.1	China	East Asia	ST383	iuc 1	-	rmp 1; KpVP-1 (incomplete),-	rmpA2_6*-47%	KL30	1	CTX-M-14^	OXA-48
GCA_017311645.1	China	East Asia	ST383	iuc 1	-	rmp 1; KpVP-1 (incomplete),-	rmpA2_6*-47%	KL30	1	CTX-M-14^	OXA-48
GCA_017311915.1	China	East Asia	ST147	iuc 1	-	rmp 1; KpVP-1 (incomplete),-	rmpA2_6*-47%	KL81	1	CTX-M-14^;CTX-M-55	OXA-48
GCA_017311935.1	China	East Asia	ST147	iuc 1	-	rmp 1; KpVP-1 (incomplete),-	rmpA2_6*-47%	KL81	1	CTX-M-14^;CTX-M-55	OXA-48
GCA_017311955.1	China	East Asia	ST147	iuc 1	-	rmp 1; KpVP-1 (incomplete),-	rmpA2_6*-47%	KL81	1	CTX-M-14^;CTX-M-55	OXA-48
GCA_017311975.1	China	East Asia	ST147	iuc 1	-	rmp 1; KpVP-1 (incomplete),-	rmpA2_6*-47%	KL81	1	CTX-M-14^;CTX-M-55	OXA-48
GCA_017311995.1	China	East Asia	ST147	iuc 1	-	rmp 1; KpVP-1 (incomplete),-	rmpA2_6*-47%	KL81	1	CTX-M-14^;CTX-M-55	OXA-48
GCA_017315205.1	China	East Asia	ST65	iuc 1	iro 1	rmp 1; KpVP-1 (truncated)	rmpA2_6*-47%	KL2	1	-	-
GCA_017595915.1	France	Europe	ST268	iuc 1	iro 1	rmp 1; KpVP-1,-	rmpA2_8*	KL20	0.7184	SHV-12	-
GCA_017640385.1	Germany	Europe	ST2096	iuc 1	-	-	rmpA2_8-60%	KL64	1	CTX-M-15	OXA-232
GCA_017743095.1	China	East Asia	ST23	iuc 1	iro 1	rmp 1; KpVP-1	rmpA2_6*-48%	KL1	0	-	-
GCA_017743115.1	China	East Asia	ST660	iuc 1	iro 1	rmp 1; KpVP-1 (truncated)	rmpA2_5-54%	KL16	1	-	-
GCA_017743135.1	China	East Asia	ST5214	iuc 3	iro 3 (truncated)	rmp 3; ICEKp1	-	KL1	0	-	-
GCA_017809835.1	China	East Asia	ST11	iuc 1	-	-	rmpA2_8*	KL64	1	CTX-M-15;SHV-12	KPC-2
GCA_017810215.1	Japan	East Asia	ST86	iuc 1	iro 1	rmp 1; KpVP-1,-	rmpA2_2-54%	KL2	1	-	-
GCA_017815715.1	China	East Asia	ST420	iuc 1	iro 1	rmp 1; KpVP-1	rmpA2_5-54%	KL20	1	-	-
GCA_017942255.1	USA	North America	ST60	iuc unknown	iro 3 (truncated)	rmp 3; ICEKp1	-	KL5	0	-	-
GCA_017942285.1	Thailand	Southeast Asia	ST65	iuc 1	iro 1	rmp 1; KpVP-1 (truncated),-	rmpA2_5-54%	KL2	1	-	-
GCA_017942305.1	USA	North America	ST23	iuc 1	iro 1	rmp 1; KpVP-1,-	rmpA2_6*-60%	KL1	1	-	-
GCA_017971935.1	Italy	Europe	ST395	iuc 1 (incomplete)	-	-	-	unknown (KL107)	0	CTX-M-15	KPC-3
GCA_017972225.1	Italy	Europe	ST512	iuc 1	-	-	-	KL107	1	-	KPC-3
GCA_017973395.1	Denmark	Europe	ST91 (subsp. ozaenae)	iuc 2A	-	-	-	KL4	0.9462	-	-
GCA_017973405.1	Denmark	Europe	ST67 (subsp. rhinoscleromatis)	iuc 4	-	rmp 4; chromosomal (truncated)	-	KL3	0.9462	-	-
GCA_017974015.1	Italy	Europe	ST395	iuc 1	-	-	-	KL2	1	CTX-M-15	KPC-3
GCA_017974115.1	Italy	Europe	ST512	iuc 1	-	-	-	KL107	1	-	KPC-3
GCA_017974155.1	Italy	Europe	ST1880	-	-	-	-	KL64	0.3428	-	KPC-3
GCA_017974275.1	Italy	Europe	ST395	iuc 1	-	-	-	KL2	1	CTX-M-15	KPC-3
GCA_017974335.1	Italy	Europe	ST512	iuc 1	-	-	-	KL107	1	-	KPC-3
GCA_017974395.1	Italy	Europe	ST395	iuc 1	-	-	-	KL2	1	CTX-M-15	KPC-3
GCA_017974445.1	Italy	Europe	ST395	iuc 1	-	-	-	KL2	1	CTX-M-15	KPC-3
GCA_017974455.1	Italy	Europe	ST512	iuc 1	-	-	-	KL107	1	-	KPC-3
GCA_017974575.1	Italy	Europe	ST395	iuc 1	-	-	-	KL2	1	CTX-M-15	KPC-3
GCA_017974635.1	Italy	Europe	ST512	iuc 1	-	-	-	KL107	1	-	KPC-3
GCA_017974795.1	Italy	Europe	ST395	iuc 1	-	-	-	KL2	1	CTX-M-15	KPC-3
GCA_017974855.1	Italy	Europe	ST512	iuc 1	-	-	-	KL107	1	-	KPC-3
GCA_017974995.1	Italy	Europe	ST512	iuc 1	-	-	-	KL107	1	-	KPC-3
GCA_017975095.1	Italy	Europe	ST395	iuc 1	-	-	-	KL2	1	CTX-M-15	OXA-48
GCA_017975335.1	Italy	Europe	ST258	iuc 1	-	-	-	KL107	1	-	KPC-3
GCA_017975365.1	Italy	Europe	ST258	iuc 1	-	-	-	KL107	0	-	KPC-3
GCA_017975625.1	Italy	Europe	ST395	iuc 1	-	-	-	KL2	1	CTX-M-15	KPC-3
GCA_018066255.1	USA	North America	ST412	iuc 1	iro 1	rmp unknown	rmpA2_8*	KL57	0	-	GES-5^
GCA_018069685.1	China	East Asia	ST660	iuc 1	-	-	rmpA2_6-60%	KL16	1	SHV-12	-
GCA_018075325.1	China	East Asia	ST11	iuc 1	-	-	rmpA2_9	KL47	1	CTX-M-65	KPC-2
GCA_018108045.1	Malaysia	Southeast Asia	ST420	iuc 1	iro 1	rmp 1; KpVP-1,-	rmpA2_3-47%	KL20	1	-	-
GCA_018108845.1	Malaysia	Southeast Asia	ST231	iuc 5	-	-	-	KL51	0	CTX-M-15	OXA-232
GCA_018108885.1	Malaysia	Southeast Asia	ST231	iuc 5	-	-	-	KL51	0	CTX-M-15	OXA-232
GCA_018108905.1	Malaysia	Southeast Asia	ST231	iuc 5	-	-	-	KL51	0	CTX-M-15	OXA-232
GCA_018137575.1	Mexico	North America	ST380	iuc 2	iro 2 (truncated)	rmp 2; KpVP-2	-	KL2	0	-	-
GCA_018138585.1	Russia	Europe	ST86	iuc 1	iro 1	-	-	unknown (KL5)	1.0222	-	-
GCA_018138645.1	Russia	Europe	ST23	iuc 1	-	rmp unknown,-,-	rmpA2_8*-60%	KL57	1	CTX-M-15	-
GCA_018138665.1	Russia	Europe	ST395	iuc 1	-	-	-	unknown (KL108)	1	CTX-M-15	OXA-48
GCA_018140695.1	China	East Asia	ST592	iuc 1	iro 1	rmp 1; KpVP-1	rmpA2_3-47%	KL57	0	-	KPC-2
GCA_018140715.1	China	East Asia	ST11	iuc 5	iro 5	-	-	KL64	0	CTX-M-65	-
GCA_018156105.1	China	East Asia	ST11	iuc 1	-	rmp 1; KpVP-1,-	rmpA2_3-47%	unknown (KL64)	1	SHV-12	KPC-2
GCA_018156185.1	China	East Asia	ST11	iuc 1	-	rmp 1; KpVP-1,-	rmpA2_3-47%	KL64	1	SHV-12	KPC-2
GCA_018156195.1	China	East Asia	ST11	iuc 1	-	rmp 1; KpVP-1,-	rmpA2_3-47%	KL64	1	SHV-12	KPC-2
GCA_018223475.1	China	East Asia	ST25	iuc 3	-	-	-	KL2	0	-	-
GCA_018271665.1	China	East Asia	ST592	iuc 1	iro 1	rmp 1; KpVP-1,-	rmpA2_6*-47%	KL57	1	-	-
GCA_018274405.1	Russia	Europe	ST39	iuc 1	-	-	-	unknown (KL107)	1	CTX-M-15	KPC-2;NDM-1;OXA-48
GCA_018274465.1	Russia	Europe	ST39	iuc 1	-	-	-	KL23	1	CTX-M-15	KPC-2;NDM-1;OXA-48
GCA_018274525.2	Russia	Europe	ST39	iuc 1	-	-	-	KL23	1	CTX-M-15	KPC-2;NDM-1;OXA-48
GCA_018274545.1	Russia	Europe	ST39	iuc 1	-	-	-	unknown (KL107)	1	CTX-M-15	KPC-2;NDM-1;OXA-48
GCA_018274555.1	Russia	Europe	ST395	iuc 1	-	-	-	KL2	1	CTX-M-15	OXA-244
GCA_018274605.1	Russia	Europe	ST395	iuc 1	-	-	-	unknown (KL5)	0.9388	CTX-M-15	OXA-244
GCA_018274625.1	Russia	Europe	ST395	iuc 1	-	-	-	unknown (KL2)	0.9536	CTX-M-15	OXA-244
GCA_018275185.1	China	East Asia	ST11	iuc 1	-	-	rmpA2_8*	KL47	1	CTX-M-65	KPC-2
GCA_018279185.1	China	East Asia	ST23	iuc 1	iro 1	rmp 1; KpVP-1	rmpA2_5-54%	KL1	1	CTX-M-24^	-
GCA_018283475.1	Pakistan	South Asia	ST11	iuc 1	-	-	rmpA2_2-54%	KL24	1	CTX-M-15	NDM-1
GCA_018283505.2	Italy	Europe	ST147	iuc 1	-	rmp 1; KpVP-1	rmpA2_6*-47%	KL64	1	CTX-M-15	NDM-1
GCA_018283575.2	Russia	Europe	ST39	iuc 1	-	-	-	KL23	1	CTX-M-15	KPC-2;NDM-1;OXA-48
GCA_018283615.1	Russia	Europe	ST23	iuc 1	-	-	-	unknown (KL57)	1	CTX-M-55	NDM-1;OXA-48
GCA_018310495.1	Italy	Europe	ST147	iuc 1	-	rmp 1; KpVP-1	rmpA2_6*-47%	KL64	1	CTX-M-15;CTX-M-15	NDM-1
GCA_018336835.1	China	East Asia	ST11	iuc 1	-	rmp 1; KpVP-1	rmpA2_3-47%	KL64	1	CTX-M-65;SHV-12	KPC-2*
GCA_018383735.5	Russia	Europe	ST39	iuc 1	-	-	-	KL23	1	CTX-M-15;CTX-M-55	KPC-2;OXA-48
GCA_018383785.2	Russia	Europe	ST39	iuc 1	-	-	-	KL23	1	CTX-M-15	KPC-2;NDM-1;OXA-48
GCA_018409155.1	Pakistan	South Asia	ST231	iuc 5	-	-	-	KL51	0	-	OXA-232
GCA_018420505.1	Germany	Europe	ST101	iuc 5	-	-	-	KL17	0	CTX-M-15	-
GCA_018420595.1	Germany	Europe	ST15	iuc 1	-	rmp 1; KpVP-1 (truncated)	rmpA2_5*-59%	KL24	1	CTX-M-15	NDM-5
GCA_018421055.1	Germany	Europe	ST147	iuc 1	-	-	rmpA2_6*-47%	KL64	0	CTX-M-15	NDM-1
GCA_018421315.1	Germany	Europe	ST147	iuc 1	-	-	-	KL64	1	CTX-M-15	NDM-1
GCA_018422135.1	Germany	Europe	ST1-3LV	iuc 1	-	rmp unknown	rmpA2_6*-0%	unknown (KL64)	1	CTX-M-15	NDM-1
GCA_018422375.1	Germany	Europe	ST147	iuc 1	-	rmp 1; KpVP-1,-	rmpA2_6*-47%	KL64	1	CTX-M-15	NDM-1
GCA_018422635.1	Germany	Europe	ST147	iuc 1	-	rmp 1; KpVP-1,-	rmpA2_6-60%	KL64	1	CTX-M-15	NDM-1
GCA_018422685.1	Germany	Europe	ST2096-1LV	iuc 1 (incomplete)	-	-	rmpA2_8-60%	KL64	1	CTX-M-15	NDM-1
GCA_018438895.1	Germany	Europe	ST15	iuc 1	-	-	-	KL19	1	CTX-M-15	OXA-48
GCA_018439465.1	Germany	Europe	ST2096	iuc 1	-	-	rmpA2_8-60%	unknown (KL64)	1	CTX-M-15	OXA-232
GCA_018440305.2	Germany	Europe	ST380-1LV	-	iro 2	rmp 2; KpVP-2	-	KL2	0	-	KPC-2;KPC-2
GCA_018440325.2	Germany	Europe	ST380-1LV	iuc 2	iro 2	-	-	unknown (KL2)	0	-	-
GCA_018440335.2	Germany	Europe	ST380-1LV	iuc 2	iro 2	rmp 2; KpVP-2 (truncated)	-	KL2	0	-	KPC-2;KPC-2
GCA_018440365.1	Germany	Europe	ST380-1LV	iuc 2 (incomplete) (truncated)	iro 2 (incomplete)	rmp 2; KpVP-2 (incomplete)	-	KL2	0	-	KPC-2
GCA_018440925.1	Germany	Europe	ST147	iuc 1	-	rmp 1; KpVP-1	-	KL64	1	CTX-M-15	NDM-1
GCA_018441365.1	Germany	Europe	ST231	iuc 5	-	-	-	KL64	0	-	OXA-232
GCA_018441475.1	Germany	Europe	ST383	iuc 1	-	rmp unknown	-	unknown (KL30)	0	CTX-M-14^;CTX-M-15	NDM-5;OXA-48
GCA_018441645.1	Germany	Europe	ST383	iuc 1	-	-	-	KL30	1	-	OXA-48
GCA_018443045.1	Germany	Europe	ST147	iuc 1	-	rmp 1; KpVP-1	-	KL35	0	CTX-M-15	NDM-1
GCA_018443065.1	Germany	Europe	ST147	iuc 1	-	rmp 1; KpVP-1	-	KL35	1	CTX-M-15	NDM-1
GCA_018443845.1	Germany	Europe	ST2096	iuc 1	-	-	rmpA2_8-60%	KL64	1	CTX-M-15	OXA-232
GCA_018445645.1	Germany	Europe	ST15	iuc 1	-	rmp 1; KpVP-1,-	rmpA2_6*-47%	KL24	1	CTX-M-15	NDM-5
GCA_018446145.1	Germany	Europe	ST395	iuc 1	-	-	-	unknown (KL2)	1	CTX-M-15	OXA-48
GCA_018446885.1	Germany	Europe	ST2096-1LV	iuc 1 (incomplete)	-	-	rmpA2_8*-60%	unknown (KL64)	1	CTX-M-15	OXA-232
GCA_018447215.1	Germany	Europe	ST147	iuc 1	-	rmp 1; KpVP-1	-	KL35	1	CTX-M-15	NDM-1
GCA_018449195.1	China	East Asia	ST236	iuc 3	-	-	-	KL127	0	CTX-M-3	-
GCA_018449215.1	China	East Asia	ST896	iuc 3	-	-	-	KL3	0	-	-
GCA_018449255.1	China	East Asia	ST896	iuc 3	-	-	-	KL3	0	-	-
GCA_018449265.1	China	East Asia	ST896	iuc 3	-	-	-	KL3	0	-	-
GCA_018449295.1	China	East Asia	ST236	iuc 3	-	-	-	KL127	0	CTX-M-3	-
GCA_018449305.1	China	East Asia	ST896	iuc 3	-	-	-	KL3	0	-	-
GCA_018449315.1	China	East Asia	ST896	iuc 3	-	-	-	KL3	0	-	-
GCA_018454365.1	China	East Asia	ST2237	iuc 1	-	-	rmpA2_8-60%	KL19	1	-	KPC-2
GCA_018487825.1	China	East Asia	ST896	iuc 3	-	-	-	KL3	0	-	-
GCA_018502565.1	China	East Asia	ST896	iuc 3	-	-	-	KL3	0	-	-
GCA_018502585.1	China	East Asia	ST967	iuc 3	-	-	-	KL19	0	CTX-M-3	-
GCA_018583165.1	China	East Asia	ST896	iuc 3	-	-	-	KL3	0	-	-
GCA_018583185.1	China	East Asia	ST896	iuc 3	-	-	-	KL3	0	-	-
GCA_018583205.1	China	East Asia	ST896	iuc 3	-	-	-	KL3	0	-	-
GCA_018583225.1	China	East Asia	ST896	iuc 3	-	-	-	KL3	0	-	-
GCA_018583245.1	China	East Asia	ST967	iuc 3	-	-	-	KL19	0	CTX-M-3	-
GCA_018583265.1	China	East Asia	ST896	iuc 3	-	-	-	KL3	0	-	-
GCA_018583285.1	China	East Asia	ST896	iuc 3	-	-	-	KL3	0	-	-
GCA_018583305.1	China	East Asia	ST896	iuc 3	-	-	-	KL3	0	-	-
GCA_018583325.1	China	East Asia	ST180	iuc 3	-	-	-	KL55	0	-	-
GCA_018604345.1	Spain	Europe	ST23	iuc 1	iro 1 (incomplete)	rmp unknown	rmpA2_8*-5%	unknown (KL1)	1	CTX-M-15	-
GCA_018604765.1	Thailand	Southeast Asia	ST17	iuc 3	-	-	-	KL25	0	CTX-M-63	-
GCA_018682405.1	China	East Asia	ST11	iuc 1	-	rmp unknown	rmpA2_8*-53%	unknown (KL64)	1	CTX-M-65	-
GCA_018682475.1	China	East Asia	ST11	iuc 1	-	-	rmpA2_8-60%	KL47	1	CTX-M-15;CTX-M-65	KPC-2;NDM-5*;NDM-5*
GCA_018682495.1	China	East Asia	ST11	iuc 1	-	rmp 1; KpVP-1 (truncated)	rmpA2_3-47%	KL64	1	CTX-M-65	-
GCA_018682505.1	China	East Asia	ST11	iuc 1	-	-	rmpA2_8-60%	KL47	0	CTX-M-15;CTX-M-65	KPC-2;NDM-5
GCA_018861895.1	China	East Asia	ST11	iuc 1	-	-	rmpA2_6*-55%	KL47	1	CTX-M-65	KPC-2
GCA_018861975.1	China	East Asia	ST11	iuc 1	-	-	rmpA2_6*-55%	unknown (KL47)	1	CTX-M-65	KPC-2
GCA_018861995.1	China	East Asia	ST11	iuc 1	-	-	rmpA2_6*-55%	KL47	1	CTX-M-65	KPC-2
GCA_018885345.1	China	East Asia	ST437	iuc 3	-	-	-	KL36	0	-	KPC-2
GCA_018907205.1	Italy	Europe	ST1861	iuc 1	iro 1	rmp 1; KpVP-1,-	rmpA2_6*-47%	KL1	1	-	-
GCA_018907255.1	Italy	Europe	ST25	iuc 1	iro 1	rmp 1; KpVP-1,-	rmpA2_8-60%	KL2	1	-	-
GCA_018907445.1	Italy	Europe	ST65	iuc 1	iro 1	rmp unknown,-	rmpA2_3-47%	KL2	1	-	-
GCA_018907485.1	Italy	Europe	ST86	-	iro 1	rmp 1; KpVP-1	-	KL2	1	-	-
GCA_018920475.1	Brazil	South America	ST3994	-	iro 3 (truncated)	rmp 3; ICEKp1	-	KL2	0	-	-
GCA_019050535.1	China	East Asia	ST11	iuc 1	-	rmp 1; KpVP-1 (truncated)	rmpA2_3-47%	KL64	1	-	KPC-2
GCA_019050575.1	China	East Asia	ST11	iuc 1	-	rmp 1; KpVP-1 (truncated)	rmpA2_3-47%	KL64	1	-	KPC-2
GCA_019051275.1	China	East Asia	ST11	iuc 1	-	rmp unknown	rmpA2_3-47%	KL64	1	-	KPC-2
GCA_019051375.1	China	East Asia	ST11	iuc 1	-	rmp 1; KpVP-1	rmpA2_3-47%	KL64	1	CTX-M-65	KPC-2
GCA_019051515.1	China	East Asia	ST11	iuc 1	-	-	rmpA2_3-47%	KL64	1	-	KPC-2
GCA_019053575.1	China	East Asia	ST11	iuc 1	-	rmp 1; KpVP-1 (truncated),-	rmpA2_3-47%	KL64	1	-	KPC-2
GCA_019053715.1	China	East Asia	ST48	iuc 1	-	-	rmpA2_8*-46%	KL62	1	CTX-M-15	KPC-2
GCA_019054075.1	China	East Asia	ST11	iuc 1	-	-	rmpA2_8-60%	KL47	1	CTX-M-65;SHV-12;SHV-12	KPC-2
GCA_019054215.1	China	East Asia	ST11	iuc 1	-	rmp 1; KpVP-1	rmpA2_3-47%	KL64	1	CTX-M-65;SHV-12	KPC-2
GCA_019054315.1	China	East Asia	ST11	iuc 1	-	-	rmpA2_8-60%	KL64	1	CTX-M-64*;SHV-12	KPC-2
GCA_019054335.1	China	East Asia	ST11	iuc 1	-	rmp 1; KpVP-1	rmpA2_3-47%	KL64	1	CTX-M-65;SHV-12	KPC-2
GCA_019054355.1	China	East Asia	ST11	iuc 1	-	rmp 1; KpVP-1,-	rmpA2_3-47%	KL64	1	CTX-M-65	KPC-2
GCA_019083905.1	Japan	East Asia	ST86	iuc 1	iro 1	rmp 1; KpVP-1,-	rmpA2_9*-54%	KL2	1	-	-
GCA_019165465.1	China	East Asia	ST86	iuc 1	iro 1	rmp 1; KpVP-1,-	rmpA2_5-54%	KL2	1	-	-
GCA_019165505.1	China	East Asia	ST806	-	iro 3 (truncated)	rmp 3; ICEKp1 (truncated)	-	KL108	0	-	-
GCA_019165545.1	China	East Asia	ST806	-	iro 3 (truncated)	rmp 3; ICEKp1 (truncated)	-	KL108	0	-	-
GCA_019165565.1	China	East Asia	ST828	iuc 3	iro 3 (truncated)	rmp 3; ICEKp1	-	KL5	0	-	-
GCA_019165595.1	China	East Asia	ST86	iuc 1	iro 1	rmp 1; KpVP-1,-	rmpA2_4*-47%	KL2	1	-	-
GCA_019165615.1	China	East Asia	ST29	iuc 1	iro 1	rmp 1; KpVP-1,-	rmpA2_8-60%	KL54	1	-	-
GCA_019165645.1	China	East Asia	ST86	iuc 1	iro 1	rmp 1; KpVP-1,-	rmpA2_9*-48%	KL2	1	-	-
GCA_019165655.1	China	East Asia	ST218	iuc 1	iro 1	rmp 1; KpVP-1,-	rmpA2_3-47%	KL57	1	-	-
GCA_019165675.1	China	East Asia	ST86	iuc 1	iro 1	rmp 1; KpVP-1,-	rmpA2_2-54%	KL2	1	-	-
GCA_019165705.1	China	East Asia	ST23	iuc 1	iro 1	rmp 1; KpVP-1,-	rmpA2_6-60%	KL1	1	-	-
GCA_019165725.1	China	East Asia	ST23	iuc 1	iro 1	rmp 1; KpVP-1,-	rmpA2_5-54%	KL1	1	-	-
GCA_019165745.1	China	East Asia	ST23	iuc 1	iro 1	rmp 1; KpVP-1,-	rmpA2_6-60%	KL1	1	-	-
GCA_019165765.1	China	East Asia	ST23	iuc 1	iro 1	rmp 1; KpVP-1,-	rmpA2_3-47%	KL1	1	-	-
GCA_019165775.1	China	East Asia	ST25	iuc 3	iro 3 (truncated)	rmp 3; ICEKp1	-	KL2	0	-	-
GCA_019165785.1	China	East Asia	ST111	-	iro 1	rmp 1; KpVP-1	-	KL63	0	-	-
GCA_019165815.1	China	East Asia	ST35	-	iro 3 (truncated)	rmp 3; ICEKp1 (truncated)	-	KL108	0	-	-
GCA_019165845.1	China	East Asia	ST23	iuc 1	iro 1	rmp 1; KpVP-1,-	rmpA2_6*-60%	KL1	1	-	-
GCA_019165865.1	China	East Asia	ST23	iuc 1	iro 1	rmp 1; KpVP-1,-	rmpA2_3-47%	KL1	1	-	-
GCA_019165885.1	China	East Asia	ST23	iuc 1	iro 1	rmp 1; KpVP-1,-	rmpA2_6-60%	KL1	1	-	-
GCA_019165925.1	China	East Asia	ST60	-	iro 3 (truncated)	rmp 3; ICEKp1	-	KL5	0	-	-
GCA_019165945.1	China	East Asia	ST23	iuc 1	iro 1	rmp 1; KpVP-1,-	rmpA2_5-54%	KL1	1	-	-
GCA_019165965.1	China	East Asia	ST86	iuc 1	iro 1	rmp 1; KpVP-1,-	rmpA2_9*	KL2	1	-	-
GCA_019220065.1	India	South Asia	ST231	iuc 5	-	-	-	KL51	0	-	OXA-232
GCA_019220105.1	India	South Asia	ST231	iuc 5	-	-	-	KL51	0	-	OXA-232
GCA_019220145.1	India	South Asia	ST231	iuc 5	-	-	-	KL51	0	-	OXA-232
GCA_019220165.1	India	South Asia	ST231	iuc 5	-	-	-	KL51	0	-	OXA-232
GCA_019220185.1	India	South Asia	ST231	iuc 5	-	-	-	KL51	0	-	-
GCA_019220375.1	India	South Asia	ST231	iuc 5	-	-	-	KL51	0	-	OXA-232
GCA_019249995.1	China	East Asia	ST380	iuc 2	iro 2	rmp 2; KpVP-2	-	KL2	0	-	-
GCA_019287095.1	India	South Asia	ST231	iuc 5	-	-	-	KL51	0	CTX-M-15;CTX-M-15	OXA-232
GCA_019287195.1	India	South Asia	ST231	iuc 5	-	-	-	KL51	0	CTX-M-15;CTX-M-15	OXA-232
GCA_019317025.1	India	South Asia	ST231	iuc 5	-	-	-	KL51	0	CTX-M-15;CTX-M-15;SHV-12	OXA-232
GCA_019317125.1	India	South Asia	ST231	iuc 5	-	-	-	KL51	0	CTX-M-15;CTX-M-15	OXA-232
GCA_019317145.1	India	South Asia	ST231	iuc 5	-	-	-	KL51	0	CTX-M-15;CTX-M-15	-
GCA_019317245.1	India	South Asia	ST231	iuc 5	-	-	-	KL51	0	CTX-M-15;CTX-M-15	OXA-232
GCA_019331835.1	China	East Asia	ST11	iuc 1	-	-	rmpA2_3*-47%	KL64	1	CTX-M-65	KPC-2
GCA_019331855.1	China	East Asia	ST11	iuc 1	-	-	rmpA2_3*-47%	KL64	1	CTX-M-65	KPC-2
GCA_019331865.1	China	East Asia	ST11	iuc 1	-	-	rmpA2_3*-47%	KL64	1	CTX-M-65	KPC-2
GCA_019331875.1	China	East Asia	ST11	iuc 1	-	-	-	KL64	1	CTX-M-65	KPC-2
GCA_019331895.1	China	East Asia	ST11	iuc 1	-	-	-	KL64	1	CTX-M-65	KPC-2
GCA_019331935.1	China	East Asia	ST11	iuc 1	-	-	rmpA2_3*-0%	KL64	1	CTX-M-65	KPC-2
GCA_019331955.1	China	East Asia	ST11	iuc 1	-	-	rmpA2_3-47%	KL64	1	CTX-M-65	KPC-2
GCA_019331975.1	China	East Asia	ST11	iuc 1	-	-	rmpA2_3-47%	KL64	1	CTX-M-65	KPC-2
GCA_019334545.1	China	East Asia	ST15	iuc 1	-	-	rmpA2_9	KL112	1	CTX-M-15;CTX-M-15	OXA-232
GCA_019391975.1	Russia	Europe	ST23	iuc 1	iro 1	-	-	unknown (KL1)	1	-	-
GCA_019391995.1	Russia	Europe	ST395	iuc 1	-	-	-	unknown (KL2)	0.7226	CTX-M-15	OXA-48
GCA_019392005.1	Russia	Europe	ST395	iuc 1	-	-	-	unknown (KL64)	1	CTX-M-15	NDM-1;OXA-48
GCA_019392015.1	Russia	Europe	ST307	iuc 1	-	-	-	unknown (KL102)	1	-	-
GCA_019392075.1	Russia	Europe	ST395	iuc 1	-	-	-	unknown (KL64)	1	CTX-M-15	NDM-1;OXA-48
GCA_019392095.1	Italy	Europe	ST101	iuc 1	-	-	rmpA2_6*-55%	KL17	1	-	KPC-3
GCA_019392115.1	Italy	Europe	ST101	iuc 1	-	-	-	KL17	1	-	-
GCA_019392125.1	Italy	Europe	ST101	iuc 1	-	-	-	KL17	1	-	KPC-3
GCA_019392175.1	Italy	Europe	ST101	iuc 1	-	-	-	KL17	1	-	KPC-3
GCA_019392205.1	Italy	Europe	ST101	iuc 1	-	-	-	KL17	1	-	KPC-3
GCA_019401045.1	China	East Asia	ST11	iuc 1	iro 1 (incomplete)	-	rmpA2_3-47%	unknown (KL64)	1	CTX-M-65	KPC-2
GCA_019401105.1	China	East Asia	ST11	iuc 1	iro 1 (incomplete)	-	rmpA2_3-47%	KL64	1	CTX-M-65	KPC-2
GCA_019401185.1	China	East Asia	ST86	iuc 1	iro 1	rmp 1; KpVP-1,-	rmpA2_9	KL2	1	-	-
GCA_019401225.1	China	East Asia	ST1764	iuc 1	iro 1	rmp 1; KpVP-1,-	rmpA2_5-54%	KL64	1	-	-
GCA_019401285.1	China	East Asia	ST29	iuc 1	iro 1	rmp 1; KpVP-1,-	rmpA2_8-60%	KL54	1	CTX-M-14;CTX-M-3;PER-1	-
GCA_019401305.1	China	East Asia	ST375	iuc 1	iro 1	rmp 1; KpVP-1,-	rmpA2_3-47%	KL2	1	-	-
GCA_019401365.1	China	East Asia	ST86	iuc 1	iro 1	rmp 1; KpVP-1,-	rmpA2_9*	KL2	1	-	-
GCA_019401385.1	China	East Asia	ST23	iuc 1	iro 1	rmp 1; KpVP-1,-	rmpA2_3-47%	KL1	1	-	-
GCA_019401395.1	China	East Asia	ST23	iuc 1	iro 1	rmp 1; KpVP-1,-	rmpA2_3-47%	KL1	1	-	-
GCA_019401425.1	China	East Asia	ST23	iuc 1	iro 1	rmp 1; KpVP-1,-	rmpA2_5-54%	KL1	1	CTX-M-14	-
GCA_019401445.1	China	East Asia	ST23	iuc 1	iro 1	rmp 1; KpVP-1,-	rmpA2_3-47%	KL1	1	-	-
GCA_019401465.1	China	East Asia	ST23	iuc 1	iro 1	rmp 1; KpVP-1,-	rmpA2_6*-47%	KL1	1	-	-
GCA_019401485.1	China	East Asia	ST60	-	iro 3 (truncated)	rmp 3; ICEKp1	-	KL5	0	-	-
GCA_019401525.1	China	East Asia	ST23	iuc 1	iro 1	rmp 1; KpVP-1,-	rmpA2_5-54%	KL1	1	-	-
GCA_019401545.1	China	East Asia	ST65	iuc 1	iro 1	rmp 1; KpVP-1 (truncated),-	rmpA2_6-60%	KL2	1	CTX-M-3	-
GCA_019401585.1	China	East Asia	ST23	iuc 1	iro 1	rmp 1; KpVP-1,-	rmpA2_5-54%	KL1	1	-	-
GCA_019401605.1	China	East Asia	ST23	iuc 1	iro 1	rmp 1; KpVP-1,-	rmpA2_3-47%	KL1	1	-	-
GCA_019401665.1	China	East Asia	ST45	iuc 3	-	-	-	KL62	0	-	-
GCA_019401725.1	China	East Asia	ST23	iuc 1	iro 1	rmp 1; KpVP-1,-	rmpA2_5-54%	KL1	1	CTX-M-14	-
GCA_019401735.1	China	East Asia	ST23	iuc 1	iro 1	rmp 1; KpVP-1,-	rmpA2_8-60%	KL1	1	-	-
GCA_019401765.1	China	East Asia	ST65	iuc 1	iro 1	rmp 1; KpVP-1 (truncated),-	rmpA2_3-47%	KL2	1	-	-
GCA_019401825.1	China	East Asia	ST23	iuc 1	iro 1	rmp 1; KpVP-1,-	rmpA2_3-47%	KL1	1	-	-
GCA_019401845.1	China	East Asia	ST23	iuc 1	iro 1	rmp 1; KpVP-1,-	rmpA2_6-60%	KL1	1	-	-
GCA_019401865.1	China	East Asia	ST1265	iuc 1	iro 1	rmp 1; KpVP-1,-	rmpA2_8-60%	KL1	1	-	-
GCA_019401905.1	China	East Asia	ST65	iuc 1	iro 1	rmp 1; KpVP-1 (truncated),-	rmpA2_3-47%	KL2	1	-	-
GCA_019401925.1	China	East Asia	ST375	iuc 1	iro 1	rmp 1; KpVP-1	-	KL2	0	-	-
GCA_019401945.1	China	East Asia	ST505	iuc 3	iro 3 (truncated)	rmp 3; ICEKp1	-	KL64	0	-	-
GCA_019426435.1	Germany	Europe	ST4961	iuc 3	-	-	-	unknown (KL50)	0	-	-
GCA_019428265.1	Germany	Europe	ST70-2LV	iuc 3	-	-	-	unknown (KL30)	0	-	-
GCA_019428415.1	Germany	Europe	ST610	iuc unknown	-	-	-	KL55	0	-	-
GCA_019433805.1	Iran	South Asia	ST893	iuc 1	-	-	rmpA2_8-60%	KL20	1	CTX-M-15	OXA-48
GCA_019433895.1	Iran	South Asia	ST893	iuc 1	-	-	rmpA2_8-60%	KL20	1	CTX-M-15	OXA-48
GCA_019434255.1	China	East Asia	ST11	iuc 1	-	rmp 1; KpVP-1	rmpA2_3-47%	KL64	1	SHV-12	KPC-2
GCA_019434275.1	China	East Asia	ST11	iuc 1	-	rmp 1; KpVP-1	rmpA2_3-47%	KL64	0	SHV-12	KPC-2
GCA_019434295.1	China	East Asia	ST11	iuc 1	-	rmp 1; KpVP-1	rmpA2_3-47%	KL64	1	SHV-12	KPC-2
GCA_019444195.1	China	East Asia	ST11	iuc 1	-	rmp 1; KpVP-1 (truncated)	rmpA2_3-47%	KL64	1	SHV-12;SHV-12	KPC-2;NDM-1
GCA_019444635.1	China	East Asia	ST11	iuc 1	-	-	rmpA2_8-60%	KL47	0	CTX-M-65;SHV-12;SHV-12	KPC-2
GCA_019445135.1	China	East Asia	ST11	iuc 1	-	rmp 1; KpVP-1 (truncated),-	rmpA2_3-47%	KL64	0	-	KPC-2
GCA_019445175.1	China	East Asia	ST11	iuc 1	-	rmp 1; KpVP-1,-	rmpA2_3-47%	KL64	1	CTX-M-65	KPC-2
GCA_019445195.1	China	East Asia	ST11	iuc 1	-	-,-	rmpA2_3-47%	KL64	1	CTX-M-65	KPC-2
GCA_019445235.1	China	East Asia	ST660	iuc 1	iro 1	rmp 1; KpVP-1 (truncated),-	rmpA2_6*-55%	KL16	1	-	KPC-2
GCA_019445245.1	China	East Asia	ST268	iuc 1	iro 1 (incomplete)	-	rmpA2_8*	KL20	0.712	-	KPC-2
GCA_019445275.1	China	East Asia	ST11	iuc 1	-	rmp 1; KpVP-1,-	rmpA2_3-47%	KL64	1	CTX-M-65	KPC-2
GCA_019445295.1	China	East Asia	ST11	iuc 1	-	rmp 1; KpVP-1 (truncated),-	rmpA2_3-47%	KL64	0	-	KPC-2
GCA_019445315.1	China	East Asia	ST11	iuc 1	-	-	rmpA2_9	KL47	1	CTX-M-65*?	KPC-2
GCA_019445345.1	China	East Asia	ST11	iuc 1	-	rmp 1; KpVP-1 (truncated),-	rmpA2_3-47%	KL64	0	-	KPC-2
GCA_019445355.1	China	East Asia	ST11	iuc 1	-	rmp 1; KpVP-1 (truncated)	rmpA2_3-47%	unknown (KL64)	1	CTX-M-65	KPC-2
GCA_019445395.1	China	East Asia	ST11	iuc 1	-	rmp 1; KpVP-1 (truncated),-	rmpA2_3-47%	KL64	0	-	KPC-2
GCA_019445405.1	China	East Asia	ST11	iuc 1	-	rmp 1; KpVP-1 (truncated),-	rmpA2_3-47%	KL64	0	-	KPC-2
GCA_019445415.1	China	East Asia	ST11	iuc 1	-	-	rmpA2_3-47%	KL21	1	CTX-M-65	KPC-2
GCA_019445455.1	China	East Asia	ST11	iuc 1	-	rmp 1; KpVP-1,-	rmpA2_3-47%	KL64	1	CTX-M-65	KPC-2
GCA_019445465.1	China	East Asia	ST11	iuc 1	-	rmp 1; KpVP-1,-	rmpA2_3-47%	KL64	1	CTX-M-65	KPC-2
GCA_019445495.1	China	East Asia	ST11	iuc 1	-	rmp 1; KpVP-1,-	rmpA2_3-47%	KL64	1	CTX-M-65	KPC-2
GCA_019445515.1	China	East Asia	ST11	iuc 1	-	rmp 1; KpVP-1 (truncated)	rmpA2_3-47%	KL64	0	-	KPC-2
GCA_019445535.1	China	East Asia	ST11	iuc 1	-	rmp 1; KpVP-1 (truncated),-	rmpA2_3-47%	KL64	0	-	KPC-2
GCA_019445555.1	China	East Asia	ST11	iuc 1	-	rmp 1; KpVP-1 (truncated),-	rmpA2_3-47%	KL64	0	-	KPC-2
GCA_019445595.1	China	East Asia	ST11	iuc 1	-	rmp 1; KpVP-1 (truncated),-	rmpA2_3-47%	KL64	0	-	KPC-2
GCA_019445605.1	China	East Asia	ST11	iuc 1	-	rmp 1; KpVP-1 (truncated),-	rmpA2_3-47%	KL64	0	-	KPC-2
GCA_019445615.1	China	East Asia	ST11	iuc 1	-	rmp 1; KpVP-1 (truncated),-	rmpA2_3-47%	KL64	0	-	KPC-2
GCA_019445695.1	China	East Asia	ST11	iuc 1	-	rmp 1; KpVP-1,-	rmpA2_3-47%	KL64	1	CTX-M-65	KPC-2
GCA_019445715.1	China	East Asia	ST11	iuc 1	-	rmp 1; KpVP-1,-	rmpA2_3-47%	KL64	1	CTX-M-65	KPC-2
GCA_019445725.1	China	East Asia	ST11	iuc 1	-	rmp 1; KpVP-1,-	rmpA2_3-47%	KL64	1	CTX-M-65	KPC-2
GCA_019455345.1	USA	North America	ST65	iuc 1	iro 1	rmp 1; KpVP-1 (truncated)	rmpA2_3-47%	KL2	1	-	-
GCA_019492095.1	China	East Asia	ST290	iuc 3	-	-	-	KL21	0	-	IMP-26;NDM-1
GCA_019677685.1	Germany	Europe	ST45	iuc 3	-	-	-	unknown (KL107)	0	-	-
GCA_019678215.1	Germany	Europe	ST2397-1LV	iuc 3	-	-	-	unknown (KL61)	0	-	-
GCA_019678225.1	Germany	Europe	ST2397-1LV	iuc 3	-	-	-	unknown (KL61)	0	-	-
GCA_019678555.1	Germany	Europe	ST107	iuc 3	-	-	-	KL10	0	-	-
GCA_019678755.1	Germany	Europe	ST494	iuc 3	-	-	-	unknown (KL25)	0	-	-
GCA_019679115.1	Germany	Europe	ST5-1LV	iuc 3	-	-	-	unknown (KL5)	0	-	-
GCA_019679125.1	Germany	Europe	ST661	iuc 3	-	-	-	KL28	0	-	-
GCA_019679245.1	Germany	Europe	ST5-1LV	iuc 3	-	-	-	KL39	0	-	-
GCA_019679275.1	Germany	Europe	ST289	iuc 3	-	-	-	KL55	0	-	-
GCA_019679295.1	Germany	Europe	ST485	iuc 3	-	-	-	KL6	0	-	-
GCA_019679305.1	Germany	Europe	ST153	iuc 3	-	-	-	KL3	0	-	-
GCA_019679335.1	Germany	Europe	ST323	iuc unknown	-	-	-	unknown (KL39)	0	-	-
GCA_019679375.1	Germany	Europe	ST2428	iuc unknown	-	-	-	KL46	0	-	-
GCA_019679415.1	Germany	Europe	ST611	iuc 3	-	-	-	KL49	0	-	-
GCA_019740935.1	China	East Asia	ST11	iuc 1	-	rmp 1; KpVP-1 (truncated)	rmpA2_3*-0%	KL64	1	SHV-12	KPC-2
GCA_019781185.1	Germany	Europe	ST383-1LV	iuc 1	-	rmp 1; KpVP-1	-	KL30	1	CTX-M-15	NDM-5
GCA_019794255.1	China	East Asia	ST39	-	iro 1	rmp 1; KpVP-1	-	KL23	0	-	-
GCA_019794935.1	China	East Asia	ST45	iuc 3	-	-	-	KL43	0	CTX-M-3	-
GCA_019795005.1	China	East Asia	ST11	iuc 1	-	rmp 1; KpVP-1,-	rmpA2_3-47%	KL64	1	CTX-M-65	KPC-2
GCA_019796015.1	China	East Asia	ST65	iuc 1	iro 1	rmp 1; KpVP-1 (truncated),-	rmpA2_5-54%	KL2	1	-	-
GCA_019796065.1	China	East Asia	ST412	iuc 1	iro 1	rmp 1; KpVP-1,-	rmpA2_8*	KL57	0	CTX-M-27	-
GCA_019796085.1	China	East Asia	ST3393	iuc 3	-	-	-	unknown (KL50)	0	-	-
GCA_019798005.1	Norway	Europe	ST420	iuc 1	iro 1	rmp 1; KpVP-1	rmpA2_3-47%	KL20	1	CTX-M-15	-
GCA_019798025.1	Norway	Europe	ST2954	iuc 3	-	-	-	KL24	0	CTX-M-1	-
GCA_019798185.1	Norway	Europe	ST2948	iuc 3	-	-	-	KL28	0	SHV-12	-
GCA_019823765.1	China	East Asia	ST11	iuc 1	-	-	rmpA2_8-60%	KL47	1	CTX-M-15;CTX-M-65	KPC-2
GCA_019823785.1	China	East Asia	ST2237	iuc 1	-	-	rmpA2_8-60%	KL19	1	-	KPC-2
GCA_019823805.1	China	East Asia	ST11	iuc 1	-	-	rmpA2_8-60%	KL47	1	CTX-M-15;CTX-M-65	KPC-2
GCA_019823835.1	China	East Asia	ST11	iuc 1	-	-	rmpA2_8-60%	KL47	1	CTX-M-65;SHV-12;SHV-12;SHV-12	KPC-2
GCA_019823855.1	China	East Asia	ST11	iuc 1	-	-	rmpA2_8-60%	KL47	1	CTX-M-65	KPC-2
GCA_019823875.1	China	East Asia	ST11	iuc 1	-	-	rmpA2_8-60%	KL47	0	CTX-M-15;SHV-12	KPC-2
GCA_019823895.1	China	East Asia	ST2237	iuc 1	-	-	rmpA2_8-60%	KL19	1	-	KPC-2
GCA_019823915.1	China	East Asia	ST11	iuc 1	-	-	rmpA2_8-60%	KL47	1	CTX-M-15;CTX-M-65;SHV-12	KPC-2
GCA_019823935.1	China	East Asia	ST11	iuc 1	-	-	rmpA2_8-60%	KL47	1	CTX-M-65	KPC-2
GCA_019823955.1	China	East Asia	ST11	iuc 1	-	-	rmpA2_8-60%	KL47	1	CTX-M-15;CTX-M-65	KPC-2
GCA_019841845.1	China	East Asia	ST23	iuc 1	iro 1	rmp 1; KpVP-1,-	rmpA2_6-60%	KL1	1	-	IMP-4
GCA_019856575.1	Russia	Europe	ST395	iuc 1	-	-	-	KL39	1	CTX-M-15	-
GCA_019915305.1	Kazakhstan	Middle East	ST23	iuc 1	iro 1	rmp 1; KpVP-1	rmpA2_5-54%	KL1	0.5042	-	-
GCA_019915325.1	Kazakhstan	Middle East	ST380	iuc 2	iro 2	rmp 2; KpVP-2	-	KL2	0	-	-
GCA_019927325.1	USA	North America	ST380	iuc 2	iro 2	rmp 2; KpVP-2	-	KL2	0	-	-
GCA_019927385.1	South Korea	East Asia	ST37	-	-	-	-	KL15	0	CTX-M-14	-
GCA_019927785.1	Thailand	Southeast Asia	ST268	iuc 1	iro 1	rmp 1; KpVP-1	rmpA2_8*	KL20	1	CTX-M-15	-
GCA_019928025.1	Jordan	Middle East	ST1399	iuc 1	-	-	-	KL43	1	CTX-M-15;SHV-12^	-
GCA_019928395.1	Thailand	Southeast Asia	ST2071	iuc 5	-	-	-	KL51	0	CTX-M-15	NDM-1
GCA_019930145.1	South Korea	East Asia	ST86	iuc 1	iro 1	rmp 1; KpVP-1,-	rmpA2_6-60%	KL2	0	-	-
GCA_020080125.1	China	East Asia	ST2237	iuc 1	-	-	rmpA2_8-60%	KL19	1	-	-
GCA_020115595.1	Switzerland	Europe	ST231	iuc 5	-	-	-	unknown (KL51)	0	-	OXA-232
GCA_020115615.1	Switzerland	Europe	ST231	iuc 5	-	-	-	unknown (KL51)	0	-	OXA-232
GCA_020119205.1	Switzerland	Europe	ST231	iuc 5	-	-	-	unknown (KL51)	0	-	OXA-232
GCA_020120245.1	Switzerland	Europe	ST48	iuc 1	-	-	-	unknown (KL62)	1	CTX-M-15	OXA-48
GCA_020121015.1	Switzerland	Europe	ST86	iuc 1	iro 1	-	-	unknown (KL5)	1	-	-
GCA_020121125.1	Switzerland	Europe	ST380	iuc 2	iro 2	-	-	unknown (KL5)	0	-	-
GCA_020121235.1	Switzerland	Europe	ST17	iuc 1	-	rmp 1; KpVP-1 (truncated)	-	unknown (KL25)	1	-	-
GCA_020177555.1	China	East Asia	ST11	iuc 1	-	rmp 1; KpVP-1,-	rmpA2_3-47%	KL64	1	CTX-M-65	KPC-2
GCA_020177615.1	China	East Asia	ST11	iuc 1	-	rmp 1; KpVP-1,-	rmpA2_3-47%	KL19	1	CTX-M-3;CTX-M-65	KPC-2
GCA_020177635.1	China	East Asia	ST11	iuc 1	-	rmp 1; KpVP-1,-	rmpA2_3-47%	KL64	1	CTX-M-65	KPC-2
GCA_020177645.1	China	East Asia	ST11	iuc 1	-	rmp 1; KpVP-1 (truncated),-	rmpA2_3-47%	KL64	1	CTX-M-65	KPC-2
GCA_020177675.1	China	East Asia	ST11	iuc 1	-	rmp unknown	rmpA2_3-47%	KL64	1	CTX-M-65	KPC-2
GCA_020177695.1	China	East Asia	ST11	iuc 1	-	rmp 1; KpVP-1,-	rmpA2_3-47%	KL64	1	CTX-M-65	KPC-2
GCA_020177715.1	China	East Asia	ST11	iuc 1	-	rmp 1; KpVP-1,-	rmpA2_3-47%	KL64	1	CTX-M-65	KPC-2
GCA_020177725.1	China	East Asia	ST11	iuc 1	-	rmp 1; KpVP-1,-	rmpA2_3-47%	KL64	1	CTX-M-65	KPC-2
GCA_020177755.1	China	East Asia	ST11	iuc 1	-	rmp 1; KpVP-1 (truncated)	rmpA2_3-47%	KL64	1	CTX-M-65	KPC-2;NDM-1
GCA_020177805.1	China	East Asia	ST11	iuc 1	-	rmp 1; KpVP-1,-	rmpA2_3-47%	KL64	1	CTX-M-65	KPC-2
GCA_020177855.1	China	East Asia	ST11	iuc 1	-	rmp 1; KpVP-1,-	rmpA2_3-47%	KL64	1	CTX-M-65	KPC-2
GCA_020177895.1	China	East Asia	ST11	iuc 1	-	-	rmpA2_8-60%	KL47	1	CTX-M-15;CTX-M-65	KPC-2
GCA_020177935.1	China	East Asia	ST11	iuc 1	-	rmp 1; KpVP-1,-	rmpA2_3-47%	KL64	1	-	KPC-2
GCA_020177955.1	China	East Asia	ST11	iuc 1	-	rmp 1; KpVP-1 (truncated),-	rmpA2_3-47%	KL64	1	CTX-M-65	KPC-2
GCA_020177975.1	China	East Asia	ST11	iuc 1	-	rmp 1; KpVP-1,-	rmpA2_3-47%	KL64	0	CTX-M-65	KPC-2
GCA_020177995.1	China	East Asia	ST11	iuc 1	-	rmp 1; KpVP-1,-	rmpA2_3-47%	KL64	1	CTX-M-65	KPC-2;NDM-1
GCA_020178025.1	China	East Asia	ST11	iuc 1	-	rmp 1; KpVP-1,-	rmpA2_3-47%	KL64	0	CTX-M-65	KPC-2
GCA_020178055.1	China	East Asia	ST11	iuc 1	-	rmp 1; KpVP-1 (truncated),-	rmpA2_3-47%	KL64	1	CTX-M-65	KPC-2
GCA_020178265.1	China	East Asia	ST11	iuc 1	-	-	-	KL47	0	CTX-M-15;CTX-M-65	KPC-2
GCA_020178325.1	China	East Asia	ST11	iuc 1	-	-	rmpA2_8*	KL47	1	CTX-M-15;CTX-M-65	KPC-2
GCA_020178355.1	China	East Asia	ST11	iuc 1	-	rmp 1; KpVP-1,-	rmpA2_3-47%	KL64	1	CTX-M-65	NDM-1
GCA_020178365.1	China	East Asia	ST11	iuc 1	-	-	rmpA2_3-47%	KL64	1	SHV-12	KPC-2
GCA_020178415.1	China	East Asia	ST11	iuc 1	-	rmp 1; KpVP-1,-	rmpA2_3-47%	KL64	1	CTX-M-65	KPC-2;NDM-1
GCA_020178435.1	China	East Asia	ST11	iuc 1	-	rmp 1; KpVP-1,-	rmpA2_3-47%	KL64	1	CTX-M-65	KPC-2
GCA_020178455.1	China	East Asia	ST11	iuc 1	-	rmp 1; KpVP-1,-	rmpA2_3-47%	KL64	1	CTX-M-65	KPC-2
GCA_020178475.1	China	East Asia	ST11	iuc 1	-	-	rmpA2_3-47%	KL64	1	CTX-M-65	KPC-2
GCA_020178495.1	China	East Asia	ST11	iuc 1	-	rmp 1; KpVP-1,-	rmpA2_3-47%	unknown (KL64)	1	-	NDM-1
GCA_020178505.1	China	East Asia	ST11	iuc 1	-	-	rmpA2_3-47%	KL64	1	CTX-M-65	KPC-2
GCA_020178545.1	China	East Asia	ST11	iuc 1	-	rmp 1; KpVP-1,-	rmpA2_3-47%	KL64	1	CTX-M-65	KPC-2
GCA_020178575.1	China	East Asia	ST11	iuc 1	-	rmp 1; KpVP-1,-	rmpA2_3-47%	KL64	1	CTX-M-65;SHV-12	KPC-2;NDM-1
GCA_020178585.1	China	East Asia	ST11	iuc 1	-	-	rmpA2_3-47%	KL64	1	CTX-M-65	KPC-2
GCA_020178615.1	China	East Asia	ST11	iuc 1	-	rmp 1; KpVP-1,-	rmpA2_3-47%	KL64	1	CTX-M-65;SHV-12	KPC-2
GCA_020178635.1	China	East Asia	ST11	iuc 1	-	-	rmpA2_8-60%	KL47	1	CTX-M-15;CTX-M-65	KPC-2
GCA_020178655.1	China	East Asia	ST11	iuc 1	-	rmp 1; KpVP-1,-	rmpA2_3-47%	KL64	1	CTX-M-65	KPC-2
GCA_020178675.1	China	East Asia	ST11	iuc 1	-	rmp 1; KpVP-1,-	rmpA2_3-47%	KL64	1	CTX-M-65	KPC-2
GCA_020178685.1	China	East Asia	ST11	iuc 1	-	-	rmpA2_3-47%	KL64	1	CTX-M-65	KPC-2
GCA_020178695.1	China	East Asia	ST11	iuc 1	-	rmp 1; KpVP-1,-	rmpA2_3-47%	KL64	1	CTX-M-65	KPC-2
GCA_020178705.1	China	East Asia	ST11	iuc 1	-	-	rmpA2_3-47%	KL64	1	CTX-M-65	KPC-2
GCA_020178755.1	China	East Asia	ST11	iuc 1	-	rmp 1; KpVP-1,-	rmpA2_3-47%	KL64	1	CTX-M-65	KPC-2
GCA_020178775.1	China	East Asia	ST11	iuc 1	-	rmp 1; KpVP-1,-	rmpA2_3-47%	KL64	1	CTX-M-65	KPC-2
GCA_020178795.1	China	East Asia	ST11	iuc 1	-	-	rmpA2_8-60%	KL47	1	CTX-M-15;CTX-M-65	KPC-2
GCA_020178815.1	China	East Asia	ST11	iuc 1	-	-	rmpA2_8*	KL47	1	CTX-M-15;CTX-M-65	KPC-2
GCA_020178825.1	China	East Asia	ST11	iuc 1	-	rmp 1; KpVP-1,-	rmpA2_3-47%	KL64	1	CTX-M-65	KPC-2
GCA_020178845.1	China	East Asia	ST11	iuc 1	-	rmp 1; KpVP-1,-	rmpA2_3-47%	KL64	1	CTX-M-65	KPC-2
GCA_020178875.1	China	East Asia	ST11	iuc 1	-	-	rmpA2_8*	KL47	1	CTX-M-15;CTX-M-65	KPC-2
GCA_020178895.1	China	East Asia	ST11	iuc 1	-	rmp 1; KpVP-1,-	rmpA2_3-47%	KL64	1	CTX-M-65	KPC-2
GCA_020178905.1	China	East Asia	ST11	iuc 1	-	-	rmpA2_3-47%	KL64	0	CTX-M-65	KPC-2
GCA_020178915.1	China	East Asia	ST11	iuc 1	-	rmp 1; KpVP-1 (truncated),-	rmpA2_3-47%	KL64	1	CTX-M-65	KPC-2
GCA_020178945.1	China	East Asia	ST11	iuc 1	-	-	rmpA2_3-47%	KL64	0	CTX-M-65	KPC-2
GCA_020295065.1	China	East Asia	ST17	-	iro 3 (truncated)	rmp 3; ICEKp1 (truncated)	-	KL25	0	-	NDM-4
GCA_020405265.1	China	East Asia	ST11	iuc 1	-	-	rmpA2_8-60%	KL47	1	CTX-M-65;SHV-12	KPC-2
GCA_020406995.1	Italy	Europe	ST147	iuc 1	-	rmp 1; KpVP-1,-	rmpA2_6*-47%	KL64	1	CTX-M-15	NDM-1
GCA_020477085.1	China	East Asia	ST11	iuc 1	-	rmp 1; KpVP-1,-	rmpA2_3-47%	KL64	0	-	KPC-2
GCA_020477105.1	China	East Asia	ST23	iuc 1	iro 1	rmp 1; KpVP-1,-	rmpA2_3-47%	KL1	1	CTX-M-14	-
GCA_020477155.1	China	East Asia	ST23	iuc 1	iro 1	rmp 1; KpVP-1,-	rmpA2_5-54%	KL1	1	-	-
GCA_020477165.1	China	East Asia	ST23	iuc 1	iro 1	rmp 1; KpVP-1,-	rmpA2_8-60%	KL1	1	-	-
GCA_020477215.1	China	East Asia	ST23	iuc 1	iro 1	rmp 1; KpVP-1,-	rmpA2_8-60%	KL1	1	-	-
GCA_020477285.1	China	East Asia	ST23	iuc 1	iro 1	rmp 1; KpVP-1,-	rmpA2_3-47%	KL1	1	-	-
GCA_020477295.1	China	East Asia	ST23	iuc 1	iro 1	rmp 1; KpVP-1,-	rmpA2_3-47%	KL1	1	CTX-M-14	-
GCA_020477345.1	China	East Asia	ST11	iuc 1	-	-	rmpA2_8*	KL64	1	CTX-M-3	-
GCA_020477555.1	China	East Asia	ST11	iuc 1	-	-	rmpA2_8*	KL64	0.6762	CTX-M-3	-
GCA_020477575.1	China	East Asia	ST11	iuc 1	-	-	rmpA2_9	KL47	1	CTX-M-65	KPC-2
GCA_020477725.1	China	East Asia	ST23	iuc 1	iro 1	rmp 1; KpVP-1,-	rmpA2_8*-60%	KL1	1	-	-
GCA_020477735.1	China	East Asia	ST11	iuc 1	-	-	rmpA2_8-60%	KL15	1	CTX-M-15	-
GCA_020477745.1	China	East Asia	ST23	iuc 1	iro 1	rmp 1; KpVP-1,-	rmpA2_6-60%	KL1	1	-	-
GCA_020477885.1	China	East Asia	ST11	iuc 1	-	-	-	unknown (KL47)	1	CTX-M-65	KPC-2
GCA_020478055.1	China	East Asia	ST11	iuc 1	-	-	rmpA2_2*-44%	unknown (KL47)	1	CTX-M-65	KPC-2
GCA_020478095.1	China	East Asia	ST11	iuc 1	-	-	-	unknown (KL47)	1	CTX-M-65	KPC-2
GCA_020478145.1	China	East Asia	ST11	iuc 1	-	-	rmpA2_2*-44%	unknown (KL47)	1	CTX-M-65	KPC-2
GCA_020478205.1	China	East Asia	ST11	iuc 1	iro 1 (incomplete)	-	rmpA2_3-47%	KL64	1	CTX-M-65	KPC-2
GCA_020478225.1	China	East Asia	ST11	iuc 1	-	-	rmpA2_8*-44%	unknown (KL47)	1	CTX-M-65	KPC-2
GCA_020478265.1	China	East Asia	ST11	iuc 1	-	rmp 1; KpVP-1 (truncated),-	rmpA2_3-47%	KL110	1	SHV-12;SHV-12	KPC-2
GCA_020478285.1	China	East Asia	ST11	iuc 1	-	-	rmpA2_2*-45%	unknown (KL47)	1	CTX-M-65	KPC-2
GCA_020478305.1	China	East Asia	ST11	iuc 1	-	-	rmpA2_3*-44%	unknown (KL47)	1	CTX-M-65;SHV-12;SHV-12;SHV-12	KPC-2
GCA_020478335.1	China	East Asia	ST23	iuc 1	iro 1	rmp 1; KpVP-1,-	rmpA2_3-47%	KL1	1	CTX-M-3	-
GCA_020478355.1	China	East Asia	ST11	iuc 1	-	-	rmpA2_8-60%	KL15	1	CTX-M-15	-
GCA_020478385.1	China	East Asia	ST11	iuc 1	-	-	rmpA2_8-60%	KL15	0	CTX-M-15	-
GCA_020478455.1	China	East Asia	ST11	iuc 1	-	-	rmpA2_3*-44%	KL62	1	CTX-M-65	KPC-2
GCA_020478485.1	China	East Asia	ST11	iuc 1	-	-	rmpA2_8-60%	KL15	1	CTX-M-15;SHV-12	-
GCA_020478525.1	China	East Asia	ST11	iuc 1	-	-	rmpA2_3-47%	KL64	1	-	KPC-2
GCA_020478605.1	China	East Asia	ST198	-	iro 3 (truncated)	rmp 3; ICEKp1	-	KL30	0	-	-
GCA_020478725.1	China	East Asia	ST86	iuc 1	iro 1	rmp 1; KpVP-1	-	KL2	1	-	-
GCA_020478765.1	China	East Asia	ST23	iuc 1	iro 1	rmp 1; KpVP-1,-	rmpA2_8-60%	KL1	1	-	-
GCA_020478785.1	China	East Asia	ST23	iuc 1	iro 1	rmp 1; KpVP-1,-	rmpA2_5-54%	KL1	1	-	-
GCA_020478795.1	China	East Asia	ST23	iuc 1	iro 1	rmp 1; KpVP-1,-	rmpA2_5-54%	KL1	1	CTX-M-3	-
GCA_020478985.1	China	East Asia	ST29	iuc 1	iro 1	rmp 1; KpVP-1,-	rmpA2_8-60%	KL54	1	-	-
GCA_020479095.1	China	East Asia	ST23	iuc 1	iro 1	rmp 1; KpVP-1,-	rmpA2_3-47%	KL1	1	CTX-M-14	-
GCA_020479125.1	China	East Asia	ST23	iuc 1	iro 1	rmp 1; KpVP-1,-	rmpA2_8-60%	KL1	1	-	-
GCA_020479185.1	China	East Asia	ST23	iuc 1	iro 1	rmp 1; KpVP-1,-	rmpA2_3-47%	KL1	1	-	-
GCA_020479285.1	China	East Asia	ST218	iuc 1	iro 1	rmp 1; KpVP-1,-	rmpA2_3-47%	KL57	0	-	-
GCA_020479345.1	China	East Asia	ST23	iuc 1	iro 1	rmp 1; KpVP-1,-	rmpA2_6*-55%	KL1	1	-	-
GCA_020479365.1	China	East Asia	ST412	-	iro 1	rmp 1; KpVP-1	-	KL57	0	-	-
GCA_020479445.1	China	East Asia	ST412	iuc 1	iro 1	rmp 1; KpVP-1,-	rmpA2_5-54%	KL57	1	-	-
GCA_020479465.1	China	East Asia	ST218	iuc 1	iro 1	rmp 1; KpVP-1 (truncated),-	rmpA2_8-60%	KL57	1	-	-
GCA_020479505.1	China	East Asia	ST412	iuc 1	iro 1	rmp 1; KpVP-1,-	rmpA2_3-47%	KL57	1	-	-
GCA_020479705.1	China	East Asia	ST6593	iuc 1	-	-	rmpA2_5-54%	KL1	1	-	-
GCA_020479905.1	China	East Asia	ST375	iuc 1	iro 1	rmp 1; KpVP-1,-	rmpA2_8-60%	KL2	1	-	-
GCA_020480825.1	China	East Asia	ST23	iuc 1	iro 1	rmp 1; KpVP-1,-	rmpA2_6-60%	KL1	1	-	-
GCA_020480845.1	China	East Asia	ST23	iuc 1	iro 1	rmp 1; KpVP-1,-	rmpA2_6-60%	KL1	1	-	-
GCA_020480885.1	China	East Asia	ST23	iuc 1	iro 1	rmp 1; KpVP-1,-	rmpA2_6-60%	KL1	1	-	-
GCA_020480985.1	China	East Asia	ST65	iuc 1	iro 1	rmp 1; KpVP-1 (truncated),-	rmpA2_6-60%	KL2	1	-	-
GCA_020480995.1	China	East Asia	ST35	-	iro 3 (truncated)	rmp 3; ICEKp1 (truncated)	-	KL108	0	CTX-M-14	-
GCA_020481045.1	China	East Asia	ST65	iuc 1	iro 1	rmp 1; KpVP-1 (truncated),-	rmpA2_6-60%	KL2	1	-	-
GCA_020481185.1	China	East Asia	ST23	iuc 1	iro 1	rmp 1; KpVP-1,-	rmpA2_3-47%	KL1	1	-	-
GCA_020481265.1	China	East Asia	ST23	iuc 1	iro 1	rmp 1; KpVP-1,-	rmpA2_6-60%	KL1	0	-	-
GCA_020481285.1	China	East Asia	ST86	iuc 1	iro 1	rmp 1; KpVP-1,-	rmpA2_4*-34%	KL2	1	-	-
GCA_020481295.1	China	East Asia	ST23	iuc 1	iro 1	rmp 1; KpVP-1,-	rmpA2_7*-59%	KL1	1	-	-
GCA_020481325.1	China	East Asia	ST23	iuc 1	iro 1	rmp 1; KpVP-1,-	rmpA2_8-60%	KL1	1	-	-
GCA_020481805.1	China	East Asia	ST11	iuc 1	-	rmp 1; KpVP-1,-	rmpA2_3-47%	KL64	0	-	KPC-2
GCA_020481825.1	China	East Asia	ST11	iuc 1	-	-	rmpA2_8-60%	KL64	1	CTX-M-65	KPC-2
GCA_020481835.1	China	East Asia	ST11	iuc 1	-	rmp 1; KpVP-1 (truncated),-	rmpA2_3-47%	KL64	0	-	KPC-2
GCA_020481855.1	China	East Asia	ST11	iuc 1	-	-	rmpA2_8-60%	KL64	1	CTX-M-65	KPC-2
GCA_020481885.1	China	East Asia	ST11	iuc 1	-	-	rmpA2_8-60%	KL64	1	CTX-M-65	KPC-2
GCA_020481905.1	China	East Asia	ST11	iuc 1	-	-	rmpA2_3-47%	KL64	1	CTX-M-65	KPC-2
GCA_020481925.1	China	East Asia	ST11	iuc 1	-	-	rmpA2_8-60%	KL64	1	CTX-M-65	KPC-2
GCA_020482005.1	China	East Asia	ST11	iuc 1	-	-	rmpA2_8*	KL64	1	CTX-M-65	KPC-2
GCA_020482095.1	China	East Asia	ST11	iuc 1	-	-	rmpA2_8-60%	KL64	1	CTX-M-65	KPC-2
GCA_020482185.1	China	East Asia	ST11	iuc 1	-	rmp 1; KpVP-1,-	rmpA2_3-47%	KL64	0	-	KPC-2
GCA_020482245.1	China	East Asia	ST11	iuc 1	-	-	rmpA2_8-60%	KL64	1	CTX-M-65	KPC-2
GCA_020482305.1	China	East Asia	ST11	iuc 1	-	-	rmpA2_8-60%	KL64	0	CTX-M-65	KPC-2
GCA_020482385.1	China	East Asia	ST11	iuc 1	-	-	rmpA2_8*	KL64	1	CTX-M-65	KPC-2
GCA_020482415.1	China	East Asia	ST11	iuc 1	-	rmp 1; KpVP-1 (truncated),-	rmpA2_3-47%	KL64	0	-	KPC-2
GCA_020482465.1	China	East Asia	ST11	iuc 1	-	-	rmpA2_8-60%	KL64	1	CTX-M-65	KPC-2
GCA_020482485.1	China	East Asia	ST11	iuc 1	-	rmp 1; KpVP-1 (truncated),-	rmpA2_3-47%	KL64	0	-	KPC-2
GCA_020482495.1	China	East Asia	ST11	iuc 1	-	-	rmpA2_8-60%	KL64	1	CTX-M-65	KPC-2
GCA_020482525.1	China	East Asia	ST23	iuc 1	iro 1	rmp 1; KpVP-1,-	rmpA2_3-47%	KL1	1	CTX-M-3	-
GCA_020482585.1	China	East Asia	ST11	iuc 1	-	rmp 1; KpVP-1 (truncated),-	rmpA2_3-47%	KL64	0	-	KPC-2
GCA_020482625.1	China	East Asia	ST11	iuc 1	-	-	rmpA2_3*-44%	unknown (KL47)	0	CTX-M-65;SHV-12;SHV-12;SHV-12	KPC-2
GCA_020482665.1	China	East Asia	ST11	iuc 1	-	-	rmpA2_3-47%	KL64	1	CTX-M-65;SHV-12;SHV-12	KPC-2
GCA_020482675.1	China	East Asia	ST11	iuc 1	-	-	rmpA2_8-60%	unknown (KL47)	1	CTX-M-65	KPC-2
GCA_020482785.1	China	East Asia	ST11	iuc 1	-	-	rmpA2_3-47%	KL64	1	CTX-M-65	KPC-2
GCA_020482805.1	China	East Asia	ST11	iuc 1	-	-	rmpA2_8-60%	unknown (KL47)	1	CTX-M-65	KPC-2
GCA_020482885.1	China	East Asia	ST11	iuc 1	-	rmp 1; KpVP-1,-	rmpA2_3-47%	KL64	1	CTX-M-65;SHV-12;SHV-12	KPC-2
GCA_020482905.1	China	East Asia	ST11	iuc 1	-	-	rmpA2_6*-55%	unknown (KL47)	1	SHV-12;SHV-12;SHV-12	KPC-2
GCA_020482945.1	China	East Asia	ST11	iuc 1	-	-	rmpA2_8*-60%	unknown (KL47)	1	CTX-M-15	KPC-2
GCA_020483085.1	China	East Asia	ST11	iuc 1	-	-	rmpA2_3*-44%	unknown (KL47)	1	CTX-M-65;SHV-12;SHV-12;SHV-12	KPC-2
GCA_020483105.1	China	East Asia	ST11	iuc 1	-	-	rmpA2_3-47%	KL64	1	CTX-M-65	KPC-2
GCA_020483165.1	China	East Asia	ST11	iuc 1	-	rmp 1; KpVP-1 (truncated),-	rmpA2_3-47%	KL64	1	SHV-12;SHV-12;SHV-12	KPC-2
GCA_020483225.1	China	East Asia	ST11	iuc 1	-	-	rmpA2_6*-47%	unknown (KL47)	1	CTX-M-65;SHV-12;SHV-12;SHV-12	KPC-2
GCA_020496635.1	China	East Asia	ST65	iuc 1 (incomplete)	iro 1	rmp 1; KpVP-1 (truncated)	rmpA2_6-60%	KL2	1	SHV-12	IMP-4
GCA_020496675.1	China	East Asia	ST65	iuc 1	iro 1	rmp 1; KpVP-1 (truncated)	rmpA2_6*-47%	KL2	1	CTX-M-15	IMP-4
GCA_020515075.1	Thailand	Southeast Asia	ST893	iuc 1	iro 1	rmp 1; KpVP-1	rmpA2_8-60%	KL20	0	CTX-M-15	KPC-2
GCA_020520185.1	China	East Asia	ST11	iuc 1 (truncated)	-	rmp 1; KpVP-1	rmpA2_3-47%	KL64	1	SHV-12	KPC-2
GCA_020520225.1	China	East Asia	ST11	iuc 1	-	-	rmpA2_3-47%	KL64	0	SHV-12	KPC-2;NDM-5
GCA_020525485.1	France	Europe	ST23	iuc 1	iro 1,iro 1	rmp 1; KpVP-1,rmp 1; KpVP-1	rmpA2_6*-60%	KL1	1	-	-
GCA_020525865.1	France	Europe	ST375	iuc 1	iro 1	rmp 1; KpVP-1	rmpA2_5-54%	KL2	1	-	-
GCA_020525885.1	France	Europe	ST86	iuc 1	iro 1	rmp 1; KpVP-1	rmpA2_4-34%	KL2	1	-	-
GCA_020544485.1	Belgium	Europe	ST893	iuc 1	iro 1	rmp 1; KpVP-1	rmpA2_8-60%	KL20	1	CTX-M-15	OXA-48
GCA_020641015.1	China	East Asia	ST412	-	iro 1	rmp 1; KpVP-1	-	KL57	0	-	-
GCA_020736285.1	China	East Asia	ST11	-	-	rmp 1; KpVP-1 (truncated)	-	KL64	0	CTX-M-65	-
GCA_020806085.1	China	East Asia	ST11	-	-	rmp 1; KpVP-1	-	KL64	0	CTX-M-65	KPC-2
GCA_020829825.1	India	South Asia	ST2096	iuc 1	-	-	-	unknown (KL64)	1	CTX-M-15	OXA-232
GCA_020829865.1	India	South Asia	ST231	iuc 5	-	-	-	KL51	0	-	OXA-232
GCA_020829945.1	India	South Asia	ST5785	iuc 5	-	-	-	KL51	0	CTX-M-15	-
GCA_020830015.1	India	South Asia	ST231	iuc 5	-	-	-	KL51	0	CTX-M-15	OXA-232
GCA_020830065.1	India	South Asia	ST2096	iuc 1	-	-	rmpA2_8-60%	KL64	1	CTX-M-15	OXA-232
GCA_020830115.1	India	South Asia	ST231	iuc 5	-	-	-	KL51	0	CTX-M-15	OXA-232
GCA_020858005.1	China	East Asia	ST23	iuc 1	iro 1	rmp 1; KpVP-1,-	rmpA2_5-54%	KL1	1	-	-
GCA_021137275.1	Switzerland	Europe	ST231	iuc 5	-	-	-	KL51	0	-	OXA-232
GCA_021137935.1	Switzerland	Europe	ST231	iuc 5	-	-	-	KL51	0	CTX-M-15;CTX-M-15	OXA-232
GCA_021172125.1	Hong Kong	East Asia	ST5605	iuc 5	-	-	-	KL122	0	CTX-M-14	-
GCA_021191795.1	China	East Asia	ST15	iuc 1	-	-	rmpA2_8*	KL24	1	-	KPC-2
GCA_021191855.1	China	East Asia	ST15	iuc 1	-	-	rmpA2_8*	KL24	0	-	KPC-2
GCA_021191865.1	China	East Asia	ST15	iuc 1	-	-	rmpA2_8*	KL24	1	-	-
GCA_021191875.1	China	East Asia	ST15	iuc 1	-	-	rmpA2_8*	KL24	1	-	KPC-2
GCA_021191895.1	China	East Asia	ST15	iuc 1	-	-	rmpA2_8*	KL24	1	-	KPC-2
GCA_021191995.1	China	East Asia	ST15	iuc 1	-	-	rmpA2_8*	KL24	1	-	KPC-2
GCA_021192015.1	China	East Asia	ST15	iuc 1	-	-	rmpA2_8*	KL24	1	-	KPC-2
GCA_021192035.1	China	East Asia	ST15	iuc 1	-	-	rmpA2_8*	KL24	1	-	KPC-2
GCA_021192055.1	China	East Asia	ST15	iuc 1	-	-	rmpA2_8*	unknown (KL24)	1	-	KPC-2
GCA_021192065.1	China	East Asia	ST15	iuc 1	-	-	rmpA2_8*	KL24	1	-	-
GCA_021192155.1	China	East Asia	ST15	iuc 1	-	-	rmpA2_8*	KL24	1	-	KPC-2
GCA_021192215.1	China	East Asia	ST11	iuc 1	-	-	rmpA2_9	KL47	1	CTX-M-65	KPC-2
GCA_021192235.1	China	East Asia	ST15	iuc 1	-	-	rmpA2_8*	KL24	1	-	KPC-2
GCA_021192255.1	China	East Asia	ST11	iuc 1	-	-	rmpA2_9	KL47	1	CTX-M-65	KPC-2
GCA_021192265.1	China	East Asia	ST15	iuc 1	-	-	rmpA2_8*	KL24	1	-	KPC-2
GCA_021192295.1	China	East Asia	ST15	iuc 1	-	-	rmpA2_8*	KL24	1	-	KPC-2
GCA_021192345.1	China	East Asia	ST15	iuc 1	-	-	rmpA2_8*	KL24	1	-	KPC-2
GCA_021192435.1	China	East Asia	ST15	iuc 1	-	-	rmpA2_8*	KL24	1	-	KPC-2
GCA_021206715.1	Pakistan	South Asia	ST3663	iuc 1	iro 1	-	-	unknown (KL2)	0	CTX-M-15	NDM-1
GCA_021206755.1	Pakistan	South Asia	ST231	iuc 5	-	-	-	unknown (KL51)	0	-	NDM-5;OXA-232
GCA_021213755.1	China	East Asia	ST11	iuc 1	-	-	rmpA2_3-47%	KL64	1	CTX-M-65	-
GCA_021213815.1	China	East Asia	ST859	iuc 1	-	rmp 1; KpVP-1 (truncated)	rmpA2_3-47%	KL19	1	SHV-12*	KPC-2*
GCA_021213855.1	China	East Asia	ST11	iuc 1	-	-	rmpA2_3-47%	KL64	1	CTX-M-65;SHV-12	KPC-2*
GCA_021213875.1	China	East Asia	ST11	iuc 1	-	-	rmpA2_8-60%	KL47	1	CTX-M-65;SHV-12	KPC-41*
GCA_021213885.1	China	East Asia	ST859	iuc 1	-	rmp 1; KpVP-1 (truncated)	rmpA2_5-54%	KL19	1	-	KPC-35
GCA_021213905.1	China	East Asia	ST859	iuc 1	-	rmp 1; KpVP-1 (truncated),-	rmpA2_5-54%	KL19	1	SHV-12	KPC-35
GCA_021213935.1	China	East Asia	ST859	iuc 1	-	rmp 1; KpVP-1 (truncated),-	rmpA2_3-47%	KL19	1	SHV-12	KPC-35
GCA_021213955.1	China	East Asia	ST11	iuc 1	-	-	rmpA2_8-60%	KL47	1	CTX-M-65;SHV-129?	KPC-41*
GCA_021228085.1	United Kingdom	Europe	ST268	iuc 1	iro 1	rmp 1; KpVP-1	rmpA2_8*	KL20	1	-	-
GCA_021229935.1	Russia	Europe	ST147	iuc 1	-	-	-	KL64	1	CTX-M-15	NDM-1;OXA-48
GCA_021229955.1	Russia	Europe	ST147	iuc 1	-	-	rmpA2_6*-61%	KL64	1	CTX-M-15	NDM-1;OXA-48
GCA_021229975.1	Russia	Europe	ST147	iuc 1	-	-	rmpA2_6*-61%	KL64	1	CTX-M-15	NDM-1;OXA-48
GCA_021249265.1	China	East Asia	ST23	iuc 1	iro 1	rmp 1; KpVP-1 (truncated)	rmpA2_5-54%	KL1	1	CTX-M-71	-
GCA_021278205.1	Pakistan	South Asia	ST2096	iuc 1	-	rmp 1; KpVP-1 (truncated),-	rmpA2_3-47%	KL64	1	CTX-M-15	OXA-232
GCA_021312515.1	China	East Asia	ST11	iuc 3	-	-	-	KL64	0	-	KPC-2;KPC-2
GCA_021395375.1	China	East Asia	ST86	-	iro 1	rmp 1; KpVP-1	-	KL2	1	-	-
GCA_021395675.1	China	East Asia	ST24	iuc 3	-	-	-	KL25	0	-	-
GCA_021395735.1	China	East Asia	ST25	iuc 3	-	-	-	KL2	0	-	-
GCA_021398155.1	China	East Asia	ST11	iuc 1	-	rmp 1; KpVP-1 (incomplete)	rmpA2_3-47%	KL64	1	CTX-M-65;SHV-12	KPC-2;NDM-1
GCA_021398425.1	China	East Asia	ST11	iuc 1	-	rmp 1; KpVP-1 (truncated)	rmpA2_3-47%	unknown (KL64)	1	CTX-M-65;SHV-12	KPC-2
GCA_021414405.1	China	East Asia	ST828	iuc 3	iro 3 (truncated)	rmp 3; ICEKp1	-	KL5	0	-	-
GCA_021414425.1	China	East Asia	ST65	iuc 1	iro 1	rmp 1; KpVP-1 (truncated),-	rmpA2_5-54%	KL2	1	-	-
GCA_021414445.1	China	East Asia	ST505	iuc 3	-	-	-	KL64	0	-	OXA-181
GCA_021414585.1	China	East Asia	ST15	iuc 5	-	-	-	KL102	0	CTX-M-14	KPC-2
GCA_021414925.1	China	East Asia	ST11	iuc 3	-	-	-	KL47	0	SHV-12	KPC-2
GCA_021415975.1	China	East Asia	ST11	iuc unknown	iro 5	-	-	KL47	0	SHV-12	KPC-2
GCA_021442005.1	China	East Asia	ST11	iuc 1	-	-	rmpA2_3-47%	KL64	1	CTX-M-65;SHV-12	KPC-2
GCA_021442045.1	China	East Asia	ST15	iuc 1	-	-	rmpA2_9,rmpA2_9	KL112	1	CTX-M-15;CTX-M-15	OXA-232
GCA_021442065.1	China	East Asia	ST11	iuc 1	-	rmp 1; KpVP-1	rmpA2_3-47%	KL64	1	CTX-M-65;SHV-12;SHV-12	KPC-2
GCA_021455445.1	China	East Asia	ST45	iuc 3	-	-	-	unknown (KL62)	0	-	-
GCA_021455465.1	China	East Asia	ST35	-	iro 1	rmp 1; KpVP-1	-	KL124	1	-	-
GCA_021455485.1	China	East Asia	ST375	iuc 1	iro 1	rmp 1; KpVP-1 (truncated),-	rmpA2_2-54%	KL2	1	-	-
GCA_021455745.1	China	East Asia	ST23	iuc 1	iro 1	rmp 1; KpVP-1,-	rmpA2_6-60%	KL1	1	-	-
GCA_021456025.1	China	East Asia	ST11	iuc 1	-	-	rmpA2_3-47%	KL64	0	-	KPC-2
GCA_021456065.1	China	East Asia	ST11	iuc 1	-	rmp unknown	rmpA2_3-47%	KL64	1	-	KPC-2
GCA_021456105.1	China	East Asia	ST11	iuc 1	-	-	rmpA2_8-60%	KL47	1	CTX-M-65	KPC-2
GCA_021456165.1	China	East Asia	ST11	iuc 1	-	-	rmpA2_8-60%	KL47	0	CTX-M-65;SHV-12	KPC-2
GCA_021456185.1	China	East Asia	ST11	iuc 1	-	rmp 1; KpVP-1 (truncated)	rmpA2_3-47%	KL64	1	-	KPC-2
GCA_021456325.1	China	East Asia	ST11	iuc 1	-	-	rmpA2_8-60%	KL47	1	CTX-M-65	KPC-2
GCA_021456345.1	China	East Asia	ST11	iuc 1	-	rmp 1; KpVP-1 (truncated),-	rmpA2_3-47%	KL64	1	SHV-12	KPC-2
GCA_021456405.1	China	East Asia	ST11	iuc 1	-	rmp 1; KpVP-1,-	rmpA2_3-47%	KL64	1	-	KPC-2
GCA_021456425.1	China	East Asia	ST11	iuc 1	-	rmp 1; KpVP-1,-	rmpA2_3-47%	KL64	0	-	KPC-2
GCA_021456445.1	China	East Asia	ST11	iuc 1	-	-,-	rmpA2_3-47%	KL64	1	SHV-12	KPC-2
GCA_021456485.1	China	East Asia	ST11	iuc 1	-	rmp 1; KpVP-1 (truncated),-	rmpA2_3-47%	KL64	1	SHV-12	KPC-2
GCA_021456525.1	China	East Asia	ST11	iuc 1	-	rmp 1; KpVP-1,-	rmpA2_3-47%	KL64	1	-	KPC-2
GCA_021456645.1	China	East Asia	ST11	iuc 1	-	rmp 1; KpVP-1 (truncated),-	rmpA2_3-47%	KL64	1	SHV-12	KPC-2
GCA_021456785.1	China	East Asia	ST37	iuc 1	-	-	rmpA2_4*-34%	KL15	1	CTX-M-14	NDM-1
GCA_021456795.1	China	East Asia	ST11	iuc 1	-	rmp 1; KpVP-1 (truncated),-	rmpA2_3-47%	KL64	1	SHV-12	KPC-2
GCA_021456825.1	China	East Asia	ST11	iuc 1	-	rmp 1; KpVP-1,-	rmpA2_3-47%	KL64	1	CTX-M-65;SHV-12	KPC-2
GCA_021457005.1	China	East Asia	ST11	iuc 1	-	rmp 1; KpVP-1,-	rmpA2_3-47%	KL64	1	SHV-12	KPC-2
GCA_021457025.1	China	East Asia	ST11	iuc 1	-	rmp 1; KpVP-1,-	rmpA2_3-47%	KL64	1	SHV-12	KPC-2
GCA_021457065.1	China	East Asia	ST11	iuc 1	-	rmp 1; KpVP-1,-	rmpA2_3-47%	KL64	1	-	KPC-2
GCA_021457105.1	China	East Asia	ST11	iuc 1	-	-	rmpA2_8-60%	KL47	1	CTX-M-15;CTX-M-65	KPC-2
GCA_021457145.1	China	East Asia	ST11	iuc 1	-	rmp 1; KpVP-1,-	rmpA2_3-47%	KL64	1	SHV-12	KPC-2
GCA_021457325.1	China	East Asia	ST11	iuc 1	iro 1 (incomplete)	-	rmpA2_3-47%	KL64	1	CTX-M-65;SHV-12	KPC-2
GCA_021457345.1	China	East Asia	ST11	iuc 1	-	rmp 1; KpVP-1 (truncated)	rmpA2_3*-0%	KL64	1	CTX-M-3;CTX-M-65	KPC-2
GCA_021457425.1	China	East Asia	ST11	iuc 1	-	rmp 1; KpVP-1,-	rmpA2_3-47%	KL64	1	-	KPC-2
GCA_021457445.1	China	East Asia	ST11	iuc 1	-	rmp 1; KpVP-1,-	rmpA2_3-47%	KL64	1	SHV-12	KPC-2
GCA_021457645.1	China	East Asia	ST11	iuc 1	-	rmp 1; KpVP-1,-	rmpA2_3-47%	KL64	1	CTX-M-65	KPC-2
GCA_021457655.1	China	East Asia	ST11	iuc 1	-	rmp 1; KpVP-1,-	rmpA2_3-47%	KL64	1	-	KPC-2
GCA_021457755.1	China	East Asia	ST11	iuc 1	-	-	rmpA2_8-60%	KL47	1	CTX-M-15;CTX-M-65	KPC-2
GCA_021457805.1	China	East Asia	ST11	iuc 1	-	rmp 1; KpVP-1,-	rmpA2_3-47%	KL64	1	SHV-12	KPC-2
GCA_021457985.1	China	East Asia	ST11	iuc 1	-	rmp 1; KpVP-1,-	rmpA2_5-54%	KL64	1	-	KPC-2
GCA_021458005.1	China	East Asia	ST11	iuc 1	-	-	rmpA2_8-60%	KL47	1	CTX-M-15;CTX-M-65	KPC-2
GCA_021458065.1	China	East Asia	ST11	iuc 1	-	rmp 1; KpVP-1,-	rmpA2_3-47%	KL64	1	-	KPC-2
GCA_021458085.1	China	East Asia	ST11	iuc 1	iro 1 (incomplete)	-	rmpA2_3-47%	KL64	1	CTX-M-65;SHV-12	KPC-2
GCA_021458185.1	China	East Asia	ST11	iuc 1	-	rmp 1; KpVP-1,-	rmpA2_3-47%	KL64	1	-	KPC-2
GCA_021458205.1	China	East Asia	ST11	iuc 1	-	rmp 1; KpVP-1 (truncated),-	rmpA2_3-47%	KL64	1	SHV-12	KPC-2
GCA_021458305.1	China	East Asia	ST11	iuc 1	-	rmp 1; KpVP-1,-	rmpA2_3-47%	KL64	1	-	KPC-2
GCA_021458355.1	China	East Asia	ST11	iuc 1	iro 1 (incomplete)	-	rmpA2_3-47%	KL64	1	CTX-M-65;SHV-12	KPC-2
GCA_021458385.1	China	East Asia	ST11	iuc 1	-	rmp 1; KpVP-1,-	rmpA2_3-47%	KL64	1	SHV-12	KPC-2
GCA_021458405.1	China	East Asia	ST11	iuc 1	-	rmp 1; KpVP-1,-	rmpA2_3-47%	KL64	1	-	KPC-2
GCA_021458415.1	China	East Asia	ST11	iuc 1	-	rmp 1; KpVP-1,-	rmpA2_3-47%	KL64	1	-	KPC-2;NDM-5
GCA_021458435.1	China	East Asia	ST11	iuc 1	-	rmp 1; KpVP-1,-	rmpA2_3-47%	KL64	1	-	KPC-2
GCA_021458465.1	China	East Asia	ST11	iuc 1	-	rmp 1; KpVP-1,-	rmpA2_3-47%	KL64	1	-	KPC-2;NDM-5
GCA_021458485.1	China	East Asia	ST11	iuc 1	-	rmp 1; KpVP-1,-	rmpA2_3-47%	KL64	1	-	KPC-2
GCA_021458525.1	China	East Asia	ST11	iuc 1	-	rmp 1; KpVP-1,-	rmpA2_3-47%	KL64	1	-	KPC-2
GCA_021458545.1	China	East Asia	ST11	iuc 1	-	rmp 1; KpVP-1,-	rmpA2_3-47%	KL64	1	SHV-2A^	KPC-2
GCA_021458605.1	China	East Asia	ST11	iuc 1	-	rmp 1; KpVP-1,-	rmpA2_3-47%	KL64	0	-	KPC-2
GCA_021458625.1	China	East Asia	ST11	iuc 1	-	rmp 1; KpVP-1,-	rmpA2_3-47%	KL64	1	-	KPC-2
GCA_021461305.1	Ethiopia	Africa	ST218	iuc 1	iro 1	rmp unknown	rmpA2_8-60%	KL57	1	CTX-M-15;CTX-M-15	-
GCA_021474905.1	Kenya	Africa	ST231	iuc 5	-	-	-	unknown (KL51)	0	CTX-M-15	OXA-232
GCA_021497265.1	China	East Asia	ST1660	iuc 1	iro 1	rmp 1; KpVP-1	rmpA2_3*-47%	KL1	1	-	-
GCA_021497485.1	China	East Asia	ST11	iuc 1	-	rmp 1; KpVP-1	rmpA2_3-47%	KL64	1	CTX-M-65;SHV-12	KPC-2*
GCA_021515575.1	China	East Asia	ST35	-	iro 1	rmp 1; KpVP-1	-	KL124	1	-	-
GCA_021515595.1	China	East Asia	ST45	iuc 3	-	-	-	unknown (KL62)	0	-	-
GCA_021515635.1	China	East Asia	ST375	iuc 1	iro 1	rmp 1; KpVP-1 (truncated),-	rmpA2_2-54%	KL2	1	-	-
GCA_021515755.1	China	East Asia	ST23	iuc 1	iro 1	rmp 1; KpVP-1,-	rmpA2_6-60%	KL1	1	-	-
GCA_021516345.1	China	East Asia	ST11	iuc 1	-	-	rmpA2_3-47%	KL64	0	-	KPC-2
GCA_021516415.1	China	East Asia	ST11	iuc 1	-	rmp unknown	rmpA2_3-47%	KL64	1	-	KPC-2
GCA_021516495.1	China	East Asia	ST11	iuc 1	-	-	rmpA2_8-60%	KL47	1	CTX-M-65	KPC-2
GCA_021516595.1	China	East Asia	ST11	iuc 1	-	-	rmpA2_8-60%	KL47	1	CTX-M-65;SHV-12	KPC-2
GCA_021516625.1	China	East Asia	ST11	iuc 1	-	rmp 1; KpVP-1 (truncated)	rmpA2_3-47%	KL64	1	-	KPC-2
GCA_021516875.1	China	East Asia	ST11	iuc 1	-	rmp 1; KpVP-1 (truncated),-	rmpA2_3-47%	KL64	1	SHV-12	KPC-2
GCA_021516895.1	China	East Asia	ST11	iuc 1	-	rmp 1; KpVP-1,-	rmpA2_3-47%	KL64	0	-	KPC-2
GCA_021516915.1	China	East Asia	ST11	iuc 1	-	-	rmpA2_8-60%	KL47	1	CTX-M-65	KPC-2
GCA_021517115.1	China	East Asia	ST11	iuc 1	-	rmp 1; KpVP-1,-	rmpA2_3-47%	KL64	1	-	KPC-2
GCA_021517175.1	China	East Asia	ST11	iuc 1	-	-,-	rmpA2_3-47%	KL64	1	SHV-12	KPC-2
GCA_021517215.1	China	East Asia	ST11	iuc 1	-	rmp 1; KpVP-1,-	rmpA2_3-47%	KL64	1	-	KPC-2
GCA_021517255.1	China	East Asia	ST11	iuc 1	-	rmp 1; KpVP-1 (truncated),-	rmpA2_3-47%	KL64	0	SHV-12	KPC-2
GCA_021517645.1	China	East Asia	ST11	iuc 1	-	rmp 1; KpVP-1 (truncated),-	rmpA2_3-47%	KL64	1	SHV-12	KPC-2
GCA_021517775.1	China	East Asia	ST11	iuc 1	-	rmp 1; KpVP-1 (truncated),-	rmpA2_3-47%	KL64	1	SHV-12	KPC-2
GCA_021517785.1	China	East Asia	ST37	iuc 1	-	-	rmpA2_4*-34%	KL15	1	CTX-M-14	NDM-1
GCA_021517915.1	China	East Asia	ST11	iuc 1	-	rmp 1; KpVP-1,-	rmpA2_3-47%	KL64	1	CTX-M-65;SHV-12	KPC-2
GCA_021518145.1	China	East Asia	ST11	iuc 1	-	rmp 1; KpVP-1,-	rmpA2_3-47%	KL64	1	SHV-12	KPC-2
GCA_021518215.1	China	East Asia	ST11	iuc 1	-	rmp 1; KpVP-1,-	rmpA2_3-47%	KL64	1	SHV-12	KPC-2
GCA_021518295.1	China	East Asia	ST11	iuc 1	-	-	rmpA2_8-60%	KL47	0	CTX-M-15;CTX-M-65	KPC-2
GCA_021518345.1	China	East Asia	ST11	iuc 1	-	rmp 1; KpVP-1,-	rmpA2_3-47%	KL64	1	-	KPC-2
GCA_021518375.1	China	East Asia	ST11	iuc 1	-	rmp 1; KpVP-1,-	rmpA2_3-47%	KL64	1	SHV-12	KPC-2
GCA_021518715.1	China	East Asia	ST11	iuc 1	iro 1 (incomplete)	-	rmpA2_3-47%	KL64	1	CTX-M-65;SHV-12	KPC-2
GCA_021518815.1	China	East Asia	ST11	iuc 1	-	rmp 1; KpVP-1 (truncated)	rmpA2_3*-0%	KL64	1	CTX-M-3;CTX-M-65	KPC-2
GCA_021518875.1	China	East Asia	ST11	iuc 1	-	rmp 1; KpVP-1,-	rmpA2_3-47%	KL64	1	-	KPC-2
GCA_021518905.1	China	East Asia	ST11	iuc 1	-	rmp 1; KpVP-1,-	rmpA2_3-47%	KL64	1	SHV-12	KPC-2
GCA_021519255.1	China	East Asia	ST11	iuc 1	-	-	rmpA2_8-60%	KL47	1	CTX-M-15;CTX-M-65	KPC-2
GCA_021519355.1	China	East Asia	ST11	iuc 1	-	rmp 1; KpVP-1,-	rmpA2_3-47%	KL64	1	SHV-12	KPC-2
GCA_021519515.1	China	East Asia	ST11	iuc 1	-	rmp 1; KpVP-1,-	rmpA2_5-54%	KL64	1	-	KPC-2
GCA_021519575.1	China	East Asia	ST11	iuc 1	-	-	rmpA2_8-60%	KL47	1	CTX-M-15;CTX-M-65	KPC-2
GCA_021519635.1	China	East Asia	ST11	iuc 1	-	rmp 1; KpVP-1,-	rmpA2_3-47%	KL64	1	-	KPC-2
GCA_021519715.1	China	East Asia	ST11	iuc 1	-	rmp 1; KpVP-1,-	rmpA2_3-47%	KL64	1	-	KPC-2
GCA_021519775.1	China	East Asia	ST412	iuc 1	iro 1	rmp 1; KpVP-1,-	rmpA2_8*	KL57	1	-	-
GCA_021519915.1	China	East Asia	ST11	iuc 1	-	rmp 1; KpVP-1,-	rmpA2_3-47%	KL64	1	-	KPC-2
GCA_021520015.1	China	East Asia	ST11	iuc 1	-	rmp 1; KpVP-1,-	rmpA2_3-47%	KL64	1	-	KPC-2
GCA_021520475.1	China	East Asia	ST11	iuc 1	-	rmp 1; KpVP-1,-	rmpA2_3-47%	KL64	1	CTX-M-65	KPC-2
GCA_021520545.1	China	East Asia	ST11	iuc 1	-	rmp 1; KpVP-1,-	rmpA2_3-47%	KL64	1	-	KPC-2
GCA_021520775.1	China	East Asia	ST11	iuc 1	iro 1 (incomplete)	-	rmpA2_3-47%	KL64	1	CTX-M-65;SHV-12	KPC-2
GCA_021520845.1	China	East Asia	ST11	iuc 1	-	rmp 1; KpVP-1 (truncated),-	rmpA2_3-47%	KL64	1	SHV-12	KPC-2
GCA_021520875.1	China	East Asia	ST11	iuc 1	-	rmp 1; KpVP-1,-	rmpA2_3-47%	KL64	1	SHV-12	KPC-2
GCA_021520995.1	China	East Asia	ST11	iuc 1	iro 1 (incomplete)	-	rmpA2_3-47%	KL64	0	CTX-M-65;SHV-12	KPC-2
GCA_021521035.1	China	East Asia	ST11	iuc 1	-	rmp 1; KpVP-1,-	rmpA2_3-47%	KL64	1	-	KPC-2
GCA_021521045.1	China	East Asia	ST11	iuc 1	-	rmp 1; KpVP-1,-	rmpA2_3-47%	KL64	1	-	KPC-2
GCA_021521075.1	China	East Asia	ST11	iuc 1	-	rmp 1; KpVP-1,-	rmpA2_3-47%	KL64	1	-	KPC-2
GCA_021521095.1	China	East Asia	ST11	iuc 1	-	rmp 1; KpVP-1,-	rmpA2_3-47%	KL64	1	-	KPC-2;NDM-5
GCA_021521105.1	China	East Asia	ST11	iuc 1	-	rmp 1; KpVP-1,-	rmpA2_3-47%	KL64	1	-	KPC-2;NDM-5
GCA_021521135.1	China	East Asia	ST11	iuc 1	-	rmp 1; KpVP-1,-	rmpA2_3-47%	KL64	1	SHV-2A^	KPC-2
GCA_021521145.1	China	East Asia	ST11	iuc 1	-	rmp 1; KpVP-1,-	rmpA2_3-47%	KL64	1	-	KPC-2
GCA_021521175.1	China	East Asia	ST11	iuc 1	-	rmp 1; KpVP-1,-	rmpA2_3-47%	KL64	1	-	KPC-2
GCA_021521235.1	China	East Asia	ST11	iuc 1	-	rmp 1; KpVP-1,-	rmpA2_3-47%	KL64	1	-	KPC-2
GCA_021521275.1	China	East Asia	ST11	iuc 1	-	rmp 1; KpVP-1,-	rmpA2_3-47%	KL64	1	-	KPC-2
GCA_021530335.1	China	East Asia	ST11	iuc 1	-	-	rmpA2_3-47%	KL64	1	CTX-M-65;SHV-12	KPC-2
GCA_021530345.1	China	East Asia	ST11	iuc 1	-	-	rmpA2_3-47%	KL64	0	CTX-M-65;SHV-12	KPC-2
GCA_021530355.1	China	East Asia	ST11	iuc 1	-	rmp 1; KpVP-1 (incomplete),-	rmpA2_3-47%	KL64	1	CTX-M-65;SHV-12^	KPC-2
GCA_021530395.1	China	East Asia	ST11	iuc 1	-	rmp 1; KpVP-1 (truncated)	rmpA2_3-47%	KL64	1	CTX-M-65;SHV-12^	KPC-2
GCA_021530495.1	China	East Asia	ST11	iuc 1	-	rmp 1; KpVP-1,-	rmpA2_3-47%	KL64	1	CTX-M-65;SHV-12^	KPC-2
GCA_021530535.1	China	East Asia	ST11	iuc 1	-	-	rmpA2_3-47%	KL64	0	CTX-M-65;SHV-12	KPC-2
GCA_021530755.1	China	East Asia	ST11	iuc 1	iro 1	rmp 1; KpVP-1 (truncated),-	rmpA2_3-47%	KL64	1	CTX-M-65;SHV-12	KPC-2
GCA_021530775.1	China	East Asia	ST11	iuc 1	-	-	rmpA2_8-60%	KL47	1	CTX-M-65;SHV-12	KPC-2
GCA_021530855.1	China	East Asia	ST65	iuc 1	iro 1	rmp 1; KpVP-1 (truncated),-	rmpA2_5-54%	KL2	1	-	-
GCA_021530875.1	China	East Asia	ST11	iuc 1	-	rmp 1; KpVP-1,-	rmpA2_3-47%	KL64	1	CTX-M-65;SHV-12^	KPC-2
GCA_021532295.1	China	East Asia	ST11	iuc 1	-	rmp 1; KpVP-1,-	rmpA2_3-47%	KL64	1	CTX-M-65;SHV-12	KPC-2
GCA_021532325.1	China	East Asia	ST11	iuc 1	-	rmp 1; KpVP-1 (truncated),-	rmpA2_3-47%	KL64	1	CTX-M-65;SHV-12^	KPC-2
GCA_021532435.1	China	East Asia	ST11	iuc 1	-	rmp 1; KpVP-1,-	rmpA2_3-47%	KL64	1	CTX-M-65;SHV-12^	KPC-2
GCA_021532675.1	China	East Asia	ST11	iuc 1	iro 1	rmp 1; KpVP-1 (truncated),-	rmpA2_3-47%	KL64	1	-	KPC-2
GCA_021532715.1	China	East Asia	ST11	iuc 1	-	-	rmpA2_8-60%	KL64	1	-	KPC-2
GCA_021532735.1	China	East Asia	ST11	iuc 1	-	rmp 1; KpVP-1,-	rmpA2_3-47%	KL64	1	-	KPC-2
GCA_021532755.1	China	East Asia	ST11	iuc 1	-	rmp 1; KpVP-1,-	rmpA2_3-47%	KL64	1	CTX-M-65;SHV-12^	KPC-2
GCA_021532795.1	China	East Asia	ST11	iuc 1	-	-	rmpA2_3-47%	KL64	0	-	KPC-2
GCA_021535085.1	China	East Asia	ST23	iuc 1	iro 1	rmp 1; KpVP-1	rmpA2_5-54%	KL1	0	CTX-M-15	-
GCA_021535105.1	China	East Asia	ST23	iuc 1	iro 1	rmp 1; KpVP-1 (truncated)	rmpA2_5-54%	KL1	0	-	-
GCA_021546455.1	China	East Asia	ST11	iuc 1	-	rmp 1; KpVP-1,-	rmpA2_3-47%	KL64	1	CTX-M-65	KPC-2
GCA_021560095.1	China	East Asia	ST11	iuc 1	-	rmp 1; KpVP-1 (truncated)	rmpA2_3-47%	KL64	1	CTX-M-65	KPC-2
GCA_021648805.1	China	East Asia	ST1764	iuc 1	iro 1	rmp 1; KpVP-1,-	rmpA2_5-54%	KL64	1	-	-
GCA_021654005.1	China	East Asia	ST412	iuc 1	-	rmp 1; KpVP-1,-	rmpA2_8*	KL57	1	CTX-M-3	-
GCA_021655415.1	Japan	East Asia	ST23	iuc 1	iro 1	rmp 1; KpVP-1	rmpA2_6-60%	KL1	1	-	-
GCA_021698875.1	China	East Asia	ST11	iuc 1	-	rmp 1; KpVP-1,-	rmpA2_3-47%	KL64	1	CTX-M-65;SHV-12	KPC-2
GCA_021726595.1	China	East Asia	ST11	iuc 1	-	rmp 1; KpVP-1,-	rmpA2_3-47%	KL64	1	CTX-M-65	KPC-2
GCA_021726615.1	China	East Asia	ST11	iuc 1	-	-	rmpA2_8-60%	KL47	0	CTX-M-65	KPC-2
GCA_021726625.1	China	East Asia	ST15	iuc 1	-	-	rmpA2_8-60%	KL19	1	CTX-M-15^	KPC-2
GCA_021726635.1	China	East Asia	ST11	iuc 1	-	rmp 1; KpVP-1,-	rmpA2_3-47%	KL64	1	CTX-M-65	KPC-2
GCA_021726675.1	China	East Asia	ST11	iuc 1	-	rmp 1; KpVP-1 (truncated),-	rmpA2_3-47%	KL64	1	CTX-M-65	KPC-2
GCA_021726695.1	China	East Asia	ST11	iuc 1	-	rmp 1; KpVP-1,-	rmpA2_3-47%	KL64	1	CTX-M-65	KPC-2
GCA_021726705.1	China	East Asia	ST5571	iuc 3	iro 3 (truncated)	rmp 3; ICEKp1	-	KL2	0	-	NDM-1
GCA_021726735.1	China	East Asia	ST11	iuc 1	-	-	rmpA2_3-47%	KL64	1	CTX-M-65;SHV-31^	KPC-2
GCA_021726755.1	China	East Asia	ST11	iuc 1	-	rmp 1; KpVP-1 (truncated),-	rmpA2_3-47%	KL64	1	CTX-M-65	KPC-2
GCA_021726775.1	China	East Asia	ST11	iuc 1	-	-	rmpA2_3-47%	KL64	1	CTX-M-65	KPC-2
GCA_021726795.1	China	East Asia	ST11	iuc 1	-	rmp 1; KpVP-1,-	rmpA2_3-47%	KL64	1	CTX-M-65	KPC-2
GCA_021726815.1	China	East Asia	ST11	iuc 1	-	rmp 1; KpVP-1,-	rmpA2_3-47%	KL64	1	CTX-M-65	KPC-2
GCA_021726835.1	China	East Asia	ST11	iuc 1	-	rmp 1; KpVP-1,-	rmpA2_3-47%	KL64	1	CTX-M-65	KPC-2
GCA_021726855.1	China	East Asia	ST23	iuc 1	iro 1	rmp 1; KpVP-1	-	KL1	1	-	KPC-2
GCA_021726875.1	China	East Asia	ST11	iuc 1 (truncated)	-	rmp 1; KpVP-1,-	rmpA2_3-47%	KL64	1	-	KPC-2
GCA_021726935.1	China	East Asia	ST11	iuc 1	-	rmp 1; KpVP-1,-	rmpA2_3-47%	KL64	1	CTX-M-65	KPC-2
GCA_021726965.1	China	East Asia	ST6242	iuc 1	-	rmp 1; KpVP-1,-	rmpA2_3-47%	KL64	1	CTX-M-65	KPC-2
GCA_021727035.1	China	East Asia	ST6242	iuc 1	-	rmp 1; KpVP-1,-	rmpA2_3-47%	KL64	1	CTX-M-65	KPC-2
GCA_021727055.1	China	East Asia	ST11	iuc 1	-	-	rmpA2_3-47%	KL64	0	CTX-M-65	KPC-2
GCA_021727075.1	China	East Asia	ST6242	iuc 1	-	rmp 1; KpVP-1,-	rmpA2_3-47%	KL64	1	-	KPC-2
GCA_021727095.1	China	East Asia	ST11	iuc 1	-	-	rmpA2_3-47%	KL21	1	CTX-M-65	KPC-2
GCA_021727115.1	China	East Asia	ST6242	iuc 1	-	rmp 1; KpVP-1,-	rmpA2_3-47%	KL64	1	CTX-M-65	KPC-2
GCA_021727125.1	China	East Asia	ST11	iuc 1	iro 1 (incomplete)	-	rmpA2_8*	KL64	1	-	KPC-2
GCA_021727185.1	China	East Asia	ST11	iuc 1	-	rmp 1; KpVP-1,-	rmpA2_3-47%	KL64	1	-	KPC-2
GCA_021727215.1	China	East Asia	ST11	iuc 1	-	rmp 1; KpVP-1,-	rmpA2_3-47%	KL64	1	CTX-M-65	KPC-2
GCA_021727235.1	China	East Asia	ST11	iuc 1	-	rmp 1; KpVP-1,-	rmpA2_3-47%	KL64	1	CTX-M-65	KPC-2
GCA_021727245.1	China	East Asia	ST11	iuc 1	-	rmp 1; KpVP-1,-	rmpA2_3-47%	KL64	1	CTX-M-65	KPC-2
GCA_021727285.1	China	East Asia	ST11	iuc 1	-	rmp 1; KpVP-1,-	rmpA2_3-47%	KL64	1	CTX-M-65	KPC-2
GCA_021727295.1	China	East Asia	ST11	iuc 1	-	rmp 1; KpVP-1,-	rmpA2_3-47%	KL64	1	CTX-M-65	-
GCA_021727355.1	China	East Asia	ST11	iuc 1	-	rmp 1; KpVP-1,-	rmpA2_3-47%	KL64	1	CTX-M-65	KPC-2
GCA_021727415.1	China	East Asia	ST11	iuc 1	-	rmp 1; KpVP-1,-	rmpA2_3-47%	KL64	1	CTX-M-65	KPC-2
GCA_021727425.1	China	East Asia	ST412	iuc 1	iro 1	rmp 1; KpVP-1,-	rmpA2_8*	KL57	1	-	-
GCA_021727455.1	China	East Asia	ST11	iuc 1	-	rmp 1; KpVP-1,-	rmpA2_3-47%	KL64	1	CTX-M-65;SHV-12^	KPC-2
GCA_021727495.1	China	East Asia	ST11	iuc 1	-	rmp 1; KpVP-1,-	rmpA2_3-47%	KL64	1	CTX-M-65	KPC-2
GCA_021727515.1	China	East Asia	ST11	iuc 1	-	rmp 1; KpVP-1,-	rmpA2_3-47%	KL64	1	CTX-M-65	KPC-2
GCA_021727555.1	China	East Asia	ST11	-	-	rmp 1; KpVP-1	-	KL64	0	CTX-M-65	KPC-2
GCA_021727595.1	China	East Asia	ST11	-	-	rmp 1; KpVP-1	-	KL64	0	CTX-M-65	KPC-2
GCA_021727615.1	China	East Asia	ST11	-	-	rmp 1; KpVP-1	-	KL64	0	CTX-M-65	KPC-2
GCA_021727635.1	China	East Asia	ST11	iuc 1	-	rmp 1; KpVP-1,-	rmpA2_3-47%	KL64	1	-	KPC-2
GCA_021727655.1	China	East Asia	ST11	iuc 1	-	rmp 1; KpVP-1,-	rmpA2_3-47%	KL64	1	-	KPC-2
GCA_021727715.1	China	East Asia	ST11	iuc 1	-	rmp 1; KpVP-1,-	rmpA2_3-47%	KL64	0	CTX-M-65	KPC-2
GCA_021727775.1	China	East Asia	ST11	iuc 1	-	-	rmpA2_8*	unknown (KL64)	1	CTX-M-65	KPC-2
GCA_021727815.1	China	East Asia	ST11	iuc 1	-	rmp 1; KpVP-1,-	rmpA2_3-47%	KL64	1	CTX-M-65	KPC-2
GCA_021727855.1	China	East Asia	ST11	iuc 1	-	rmp 1; KpVP-1,-	rmpA2_3-47%	KL64	1	CTX-M-65	KPC-2
GCA_021727955.1	China	East Asia	ST11	iuc 1	-	rmp 1; KpVP-1,-	rmpA2_3-47%	KL64	1	CTX-M-65	KPC-2
GCA_021774555.3	USA	North America	ST54	iuc 1	-	-	-	unknown (KL14)	1	CTX-M-14;CTX-M-14;CTX-M-15;CTX-M-15	NDM-5;NDM-5
GCA_021774805.3	USA	North America	ST395	iuc 1	-	-	-	unknown (KL108)	0.981	-	NDM-1;NDM-1;OXA-48;OXA-48
GCA_021777045.3	USA	North America	ST54	iuc 1	-	-	-	unknown (KL14)	0.9831	CTX-M-15;CTX-M-15	NDM-5;NDM-5
GCA_021777255.1	United Kingdom	Europe	ST15	iuc 1	-	rmp 1; KpVP-1,-	rmpA2_6*-55%	KL24	1	CTX-M-15;CTX-M-15	NDM-1;NDM-1
GCA_021777315.1	United Kingdom	Europe	ST15	iuc 1	-	rmp 1; KpVP-1,-	rmpA2_6*-47%	KL24	1	CTX-M-15;CTX-M-15	NDM-1;NDM-1
GCA_021778425.1	United Kingdom	Europe	ST231	iuc 5	-	-	-	KL51	0	CTX-M-15;SHV-12;SHV-5^;SHV-5^	OXA-232;OXA-232
GCA_021778475.1	United Kingdom	Europe	ST231	iuc 5	-	-	-	KL51	0	CTX-M-15	OXA-232;OXA-232
GCA_021782475.1	United Kingdom	Europe	ST231	iuc 5	-	-	-	KL51	0	CTX-M-15;CTX-M-15	NDM-1;NDM-1
GCA_021782535.1	United Kingdom	Europe	ST231	iuc 5	-	-	-	KL51	0	CTX-M-15;CTX-M-15	NDM-1;NDM-1
GCA_021782605.1	United Kingdom	Europe	ST231	iuc 5	-	-	-	KL51	0	CTX-M-15;CTX-M-15;CTX-M-15	NDM-1;NDM-1
GCA_021783195.1	United Kingdom	Europe	ST147	iuc 1	-	rmp 1; KpVP-1,-	rmpA2_6*-47%	KL64	1	CTX-M-14^;CTX-M-14^	OXA-48;OXA-48
GCA_021783535.1	United Kingdom	Europe	ST231	iuc 5	-	-	-	KL51	0	CTX-M-15	OXA-232;OXA-232
GCA_021783825.1	United Kingdom	Europe	ST231	-	-	-	-	KL51	0	CTX-M-15;CTX-M-15	OXA-181;OXA-181
GCA_021787305.1	United Kingdom	Europe	ST231	iuc 5	-	-	-	KL51	0	CTX-M-15	OXA-232;OXA-232
GCA_021789535.1	United Kingdom	Europe	ST147	iuc 1	-	rmp 1; KpVP-1 (incomplete),-	rmpA2_6*-47%	KL35	1	CTX-M-15;CTX-M-15	NDM-1;NDM-1
GCA_021795165.1	United Kingdom	Europe	ST231	iuc 5	-	-	-	KL51	0	CTX-M-15	OXA-232;OXA-232
GCA_021796875.1	United Kingdom	Europe	ST231	iuc 5	-	-	-	KL51	0	CTX-M-15	OXA-232;OXA-232
GCA_021800015.1	United Kingdom	Europe	ST15	iuc 1	-	rmp 1; KpVP-1,-	rmpA2_6*-55%	KL24	1	CTX-M-15;CTX-M-15	NDM-1;NDM-1
GCA_021800885.1	United Kingdom	Europe	ST231	iuc 5	-	-	-	KL51	0	CTX-M-15;CTX-M-15	NDM-1;NDM-1
GCA_021804235.1	United Kingdom	Europe	ST147	iuc 1	-	rmp 1; KpVP-1,-	rmpA2_6*-47%	KL35	1	CTX-M-15;CTX-M-15	NDM-1;NDM-1
GCA_021806775.1	United Kingdom	Europe	ST1399	iuc 1	-	-	-	KL43	1	-	NDM-1;NDM-1
GCA_021807315.1	United Kingdom	Europe	ST231	iuc 5	-	-	-	KL51	0	CTX-M-15;CTX-M-15	NDM-1;NDM-1
GCA_021807425.1	United Kingdom	Europe	ST231	iuc 5	-	-	-	KL51	0	CTX-M-15;CTX-M-15	OXA-181;OXA-181
GCA_021814865.3	USA	North America	ST111	iuc 1	-	-	rmpA2_6-60%	KL63	0	CTX-M-15;CTX-M-15	NDM-5;NDM-5
GCA_021814975.1	Singapore	Southeast Asia	ST231	iuc 5	-	-	-	KL51	0	CTX-M-15;CTX-M-15	OXA-181;OXA-181
GCA_021816185.3	USA	North America	ST147	iuc 1	-	-	rmpA2_6*-47%	unknown (KL64)	1	CTX-M-15;CTX-M-15	NDM-5;NDM-5
GCA_021816245.3	USA	North America	ST111	iuc 1	-	-	rmpA2_6*-47%	KL63	1	CTX-M-15;CTX-M-15	NDM-5;NDM-5
GCA_021816265.3	USA	North America	ST111	iuc 1	-	-	rmpA2_6*-47%	KL63	1	CTX-M-15;CTX-M-15	NDM-5;NDM-5
GCA_021819745.1	Germany	Europe	ST395	iuc 1	-	-	-	KL2	1	CTX-M-15;CTX-M-15	OXA-48;OXA-48
GCA_021821535.1	USA	North America	ST23	iuc 1	iro 1	rmp 1; KpVP-1 (truncated),-	rmpA2_5*-0%	unknown (KL1)	1	-	-
GCA_021821575.1	USA	North America	ST373	iuc 1	iro 1	rmp 1; KpVP-1	-	KL2	1	-	-
GCA_021822885.1	USA	North America	ST23	iuc 1	iro 1	rmp 1; KpVP-1 (truncated)	-	unknown (KL1)	1	-	-
GCA_021822925.1	USA	North America	ST86-1LV	iuc 1	iro 1	rmp 1; KpVP-1	rmpA2_9	unknown (KL2)	1	-	-
GCA_021824505.1	USA	North America	ST23	iuc 1	iro 1	rmp 1; KpVP-1 (incomplete)	-	KL1	1	-	-
GCA_021837415.1	Switzerland	Europe	ST147	iuc 1	-	rmp 1; KpVP-1	-	KL20	1	CTX-M-15;CTX-M-15	NDM-1;NDM-1
GCA_021837605.1	Switzerland	Europe	ST147	iuc 1	-	rmp 1; KpVP-1,-	rmpA2_6*-47%	KL64	1	CTX-M-15;CTX-M-15	NDM-1;NDM-1
GCA_021837685.1	Switzerland	Europe	ST147	iuc 1	-	rmp 1; KpVP-1,-	rmpA2_6*-47%	KL20	1	CTX-M-15;CTX-M-15	NDM-1;NDM-1
GCA_021838105.1	Switzerland	Europe	ST147	iuc 1	-	rmp 1; KpVP-1 (incomplete)	-	unknown (KL64)	1	CTX-M-15;CTX-M-15	NDM-1;NDM-1
GCA_021842835.3	USA	North America	ST147	iuc 1	-	-	rmpA2_6*-47%	unknown (KL64)	1	CTX-M-15;CTX-M-15	NDM-5;NDM-5
GCA_021842875.1	Singapore	Southeast Asia	ST11	iuc 1	-	-	rmpA2_8*	KL24	1	CTX-M-15;CTX-M-15	NDM-1;NDM-1
GCA_021849165.1	Japan	East Asia	ST86	iuc 1	iro 1	rmp 1; KpVP-1	-	KL2	1	-	-
GCA_021849185.1	Japan	East Asia	ST218	iuc 1	iro 1	rmp 1; KpVP-1,-	rmpA2_8*-0%	KL57	1	-	-
GCA_021849305.1	Japan	East Asia	ST36	iuc 1	iro 1	rmp 1; KpVP-1	rmpA2_9	KL62	0.789	-	-
GCA_021849375.1	Japan	East Asia	ST36	iuc 1	iro 1	rmp 1; KpVP-1	rmpA2_9	KL62	1	-	-
GCA_021849395.1	Japan	East Asia	ST23	iuc 1	iro 1	rmp 1; KpVP-1	-	KL1	1	-	-
GCA_021849535.1	Japan	East Asia	ST268	iuc 1	iro 1	rmp 1; KpVP-1	rmpA2_9	KL20	1	-	IMP-1;IMP-1
GCA_021849565.1	Japan	East Asia	ST268	iuc 1	iro 1	rmp 1; KpVP-1	rmpA2_9	KL20	1	-	IMP-1;IMP-1
GCA_021849925.1	Japan	East Asia	ST86	iuc 1	iro 1	rmp 1; KpVP-1	-	KL2	1	-	-
GCA_021849945.1	Japan	East Asia	ST86	iuc 1	iro 1	rmp 1; KpVP-1 (incomplete)	-	KL2	0	-	-
GCA_021850045.1	Japan	East Asia	ST82	iuc 2A	-	rmp unknown	-	KL1	0.9462	-	-
GCA_021850065.1	Japan	East Asia	ST2039	iuc 2	iro 2	rmp 2; KpVP-2 (incomplete)	-	KL2	0	-	-
GCA_021850225.1	Japan	East Asia	ST23	iuc 1	iro 1	rmp 1; KpVP-1	-	KL1	1	-	-
GCA_021850285.1	Japan	East Asia	ST268-1LV	iuc 1	iro 1	rmp 1; KpVP-1	rmpA2_8*	KL20	1	-	-
GCA_021850305.1	Japan	East Asia	ST29	-	iro 1	rmp 1; KpVP-1	-	KL54	0	-	-
GCA_021850445.1	Japan	East Asia	ST23	iuc 1	iro 1	rmp 1; KpVP-1 (truncated)	rmpA2_3*-47%	KL1	1	-	-
GCA_021850465.1	Japan	East Asia	ST65	iuc 1	iro 1	rmp 1; KpVP-1 (incomplete) (truncated)	-	KL2	1	-	-
GCA_021850585.1	Japan	East Asia	ST268	iuc 1	iro 1	rmp 1; KpVP-1 (truncated)	rmpA2_8*-0%	KL20	1	-	-
GCA_021850675.1	Japan	East Asia	ST268	iuc 1	iro 1	rmp 1; KpVP-1 (incomplete)	rmpA2_8*-0%	KL20	1	-	-
GCA_021850715.1	Japan	East Asia	ST412	iuc 1	iro 1	rmp 1; KpVP-1 (truncated),-	rmpA2_3-47%	KL57	0	-	-
GCA_021850925.1	Japan	East Asia	ST375	iuc 1	iro 1	rmp 1; KpVP-1,-	rmpA2_2-54%	KL2	1	-	-
GCA_021851045.1	Japan	East Asia	ST65	iuc 1	iro 1	rmp 1; KpVP-1 (truncated)	rmpA2_5*-0%	KL2	1	-	-
GCA_021851085.1	Japan	East Asia	ST23	iuc 1	iro 1	rmp 1; KpVP-1 (truncated),-	rmpA2_5-54%	KL1	1	-	-
GCA_021851125.1	Japan	East Asia	ST82	iuc 2A	-	rmp 2A; plasmid/chr (truncated)	-	KL1	0.9462	-	-
GCA_021851285.1	Japan	East Asia	ST268-1LV	iuc 1	iro 1	rmp 1; KpVP-1	rmpA2_8*	KL20	1	-	-
GCA_021851425.1	Japan	East Asia	ST25	iuc 1	iro 1	rmp 1; KpVP-1 (incomplete)	-	KL2	1	-	-
GCA_021851595.1	Japan	East Asia	ST23	iuc 1	iro 1	-	-	KL1	1	-	-
GCA_021851765.1	Japan	East Asia	ST82	iuc 2A	-	-	-	KL1	0.9462	-	-
GCA_021853115.1	Japan	East Asia	ST86	iuc 1	iro 1	-	-	KL2	1	-	-
GCA_021853135.1	Japan	East Asia	ST86	iuc 1	iro 1	rmp 1; KpVP-1 (incomplete)	-	KL2	1	-	-
GCA_021853195.1	Japan	East Asia	ST268	iuc 1	iro 1	rmp 1; KpVP-1 (truncated)	rmpA2_8*-0%	KL20	1	CTX-M-2;CTX-M-2	-
GCA_021853235.1	Japan	East Asia	ST65	iuc 1	iro 1	rmp 1; KpVP-1 (truncated),-	rmpA2_6-60%	KL2	1	-	-
GCA_021853255.1	Japan	East Asia	ST86	iuc 1	iro 1	rmp 1; KpVP-1	-	KL2	1	-	-
GCA_021853275.1	Japan	East Asia	ST36	iuc 1	iro 1	rmp 1; KpVP-1	rmpA2_9	KL62	1	-	-
GCA_021853295.1	Japan	East Asia	ST65	iuc 1	iro 1	rmp 1; KpVP-1 (truncated)	rmpA2_6*-0%	KL2	0	-	-
GCA_021853315.1	Japan	East Asia	ST65	iuc 1	iro 1	rmp unknown	rmpA2_6-60%	KL2	0	-	-
GCA_021853335.1	Japan	East Asia	ST268	iuc 1	iro 1	rmp 1; KpVP-1 (truncated)	rmpA2_8-60%	KL20	1	-	-
GCA_021853355.1	Japan	East Asia	ST23	iuc 1	iro 1	rmp unknown	rmpA2_5-54%	KL1	1	-	-
GCA_021853375.1	Japan	East Asia	ST36	iuc 1	iro 1	rmp 1; KpVP-1	-	KL62	1	-	-
GCA_021853395.1	Japan	East Asia	ST65	iuc 1	iro 1	rmp 1; KpVP-1 (truncated)	-	KL2	1	-	-
GCA_021853415.1	Japan	East Asia	ST29	iuc 1	iro 1	rmp 1; KpVP-1,-	rmpA2_8-60%	KL54	1	-	-
GCA_021853435.1	Japan	East Asia	ST23	iuc 1	iro 1	rmp 1; KpVP-1,-	rmpA2_6*-60%	KL1	1	-	-
GCA_021853455.1	Japan	East Asia	ST86	iuc 1	iro 1	rmp 1; KpVP-1 (truncated)	rmpA2_2*-35%	KL2	1	-	-
GCA_021853475.1	Japan	East Asia	ST86	iuc 1	iro 1	rmp 1; KpVP-1 (incomplete)	-	KL2	1	-	-
GCA_021853535.1	Japan	East Asia	ST660	iuc 1	iro 1	rmp 1; KpVP-1 (truncated)	-	KL16	1	-	-
GCA_021853555.1	Japan	East Asia	ST86	iuc 1	iro 1 (truncated)	rmp 1; KpVP-1	-	KL2	1	CTX-M-2;CTX-M-2	-
GCA_021853575.1	Japan	East Asia	ST375	iuc unknown	iro 1	rmp 1; KpVP-1 (incomplete)	-	KL2	0	-	-
GCA_021853645.1	Japan	East Asia	ST23	iuc 1	iro 1	rmp 1; KpVP-1,-	rmpA2_6-60%	KL1	1	-	-
GCA_021853665.1	Japan	East Asia	ST268	iuc 1	iro 1	-	-	KL20	0	-	-
GCA_021853685.1	Japan	East Asia	ST82	iuc 2A	-	rmp 2A; plasmid/chr (truncated)	-	KL1	0.9462	-	-
GCA_021853705.1	Japan	East Asia	ST268	iuc 1	iro 1	rmp 1; KpVP-1	rmpA2_8*	KL20	1	CTX-M-2;CTX-M-2	-
GCA_021853745.1	Japan	East Asia	ST86	iuc 1	iro 1	rmp 1; KpVP-1,-	rmpA2_2*	KL2	1	-	-
GCA_021853755.1	Japan	East Asia	ST65	iuc 1	-	rmp 1; KpVP-1 (incomplete) (truncated)	-	KL2	1	-	-
GCA_021853785.1	Japan	East Asia	ST412	iuc 1	iro 1	rmp unknown	rmpA2_8*	KL57	1	-	-
GCA_021853805.1	Japan	East Asia	ST65	iuc 1	iro 1	rmp 1; KpVP-1 (truncated)	-	KL2	1	-	-
GCA_021853825.1	Japan	East Asia	ST65	iuc 1	iro 1	rmp 1; KpVP-1 (truncated),-	rmpA2_6-60%	KL2	1	-	-
GCA_021853845.1	Japan	East Asia	ST412	iuc 1	iro 1	rmp 1; KpVP-1	rmpA2_8*	KL57	1	-	-
GCA_021853865.1	Japan	East Asia	ST86	iuc 1	iro 1	rmp 1; KpVP-1,-	rmpA2_4*-34%	KL2	1	-	-
GCA_021853885.1	Japan	East Asia	ST268	iuc 1	iro 1	rmp 1; KpVP-1,-	rmpA2_8*	KL20	1	-	-
GCA_021853905.1	Japan	East Asia	ST375	iuc 1	iro 1	rmp 1; KpVP-1,-	rmpA2_3-47%	KL2	1	-	-
GCA_021853925.1	Japan	East Asia	ST86	-	iro 1	rmp 1; KpVP-1	-	KL2	1	-	-
GCA_021853945.1	Japan	East Asia	ST23-1LV	iuc 1	iro 1	rmp 1; KpVP-1,-	rmpA2_6*-47%	KL1	1	-	-
GCA_021853965.1	Japan	East Asia	ST86	iuc 1	iro 1	rmp 1; KpVP-1	-	KL2	1	-	-
GCA_021853985.1	Japan	East Asia	ST23	iuc 1	iro 1	rmp 1; KpVP-1 (incomplete)	-	KL1	1	-	-
GCA_021854005.1	Japan	East Asia	ST23	iuc 1	iro 1	rmp 1; KpVP-1,-	rmpA2_6-60%	KL1	1	-	-
GCA_021854025.1	Japan	East Asia	ST23	iuc 1	iro 1	rmp 1; KpVP-1 (truncated),-	rmpA2_6-60%	KL1	1	-	-
GCA_021854045.1	Japan	East Asia	ST17	-	iro 3 (truncated)	rmp 3; ICEKp1 (truncated)	-	KL25	0	-	-
GCA_021854065.1	Japan	East Asia	ST35	-	iro 3 (truncated)	rmp 3; ICEKp1 (truncated)	-	KL108	0	-	-
GCA_021854085.1	Japan	East Asia	ST82	iuc 2A	-	rmp 2A; plasmid/chr (truncated)	-	KL1	0.9462	-	-
GCA_021854115.1	Japan	East Asia	ST65	iuc 1	iro 1	rmp 1; KpVP-1 (truncated)	rmpA2_5-54%	KL2	1	-	-
GCA_021854155.1	Japan	East Asia	ST65	iuc 1	iro 1	rmp 1; KpVP-1 (truncated)	-	KL2	1	-	-
GCA_021854175.1	Japan	East Asia	ST65	iuc 1	iro 1	rmp 1; KpVP-1 (truncated),-	rmpA2_6*-55%	KL2	1	-	-
GCA_021854195.1	Japan	East Asia	ST86	iuc 1	iro 1	rmp 1; KpVP-1,-	rmpA2_4*-34%	KL2	1	-	-
GCA_021854235.1	Japan	East Asia	ST412	iuc 1	iro 1	rmp unknown	rmpA2_8*-0%	KL57	1	-	-
GCA_021854435.1	USA	North America	ST268	iuc 1	iro 1	rmp 1; KpVP-1 (incomplete)	-	KL20	0	-	KPC-2;KPC-2
GCA_021856845.1	Italy	Europe	ST1832	iuc unknown	-	-	-	unknown (KL46)	0	-	-
GCA_021863145.1	Switzerland	Europe	ST231	iuc 5	-	-	-	KL51	0	CTX-M-15	-
GCA_021863565.1	Switzerland	Europe	ST967	iuc 3	-	-	-	unknown (KL18)	0	SHV-12	-
GCA_021865775.1	France	Europe	ST4867	iuc 3	-	-	-	KL51	0	-	-
GCA_021870935.3	USA	North America	ST13	iuc 1	-	-	rmpA2_6*-47%	KL3	1	CTX-M-15;CTX-M-15	NDM-5;NDM-5
GCA_021870975.3	USA	North America	ST13	iuc 1	-	-	rmpA2_6*-47%	KL3	1	CTX-M-15;CTX-M-15	NDM-5;NDM-5
GCA_021871075.3	USA	North America	ST111	iuc 1	-	-	-	KL63	1	CTX-M-15;CTX-M-15	NDM-5;NDM-5
GCA_021871105.3	USA	North America	ST111	iuc 1	-	-	rmpA2_6*-47%	KL63	1	CTX-M-15;CTX-M-15	NDM-5;NDM-5
GCA_021871135.3	USA	North America	ST147	iuc 1	-	-	rmpA2_6*-47%	unknown (KL64)	1	CTX-M-15;CTX-M-15	NDM-5;NDM-5
GCA_021871155.3	USA	North America	ST111	iuc 1	-	-	rmpA2_6*-47%	KL63	1	CTX-M-15;CTX-M-15	NDM-5;NDM-5
GCA_021871175.3	USA	North America	ST113	iuc 1	-	-	rmpA2_6*-47%	unknown (KL114)	1	CTX-M-15;CTX-M-15	NDM-5;NDM-5
GCA_021871315.1	China	East Asia	ST23	iuc 1	iro 1	rmp 1; KpVP-1,-	rmpA2_3-47%	KL1	1	-	-
GCA_021871355.3	USA	North America	ST147	iuc 1	-	-	rmpA2_6*-47%	unknown (KL64)	1	CTX-M-15;CTX-M-15	NDM-5;NDM-5
GCA_021871395.1	China	East Asia	ST11	iuc 1	-	rmp 1; KpVP-1,-	rmpA2_3-47%	KL64	1	CTX-M-65;CTX-M-65;SHV-12;SHV-12	KPC-2;KPC-2
GCA_021871415.3	USA	North America	ST111	iuc 1	-	-	rmpA2_6*-47%	KL63	1	CTX-M-15;CTX-M-15	NDM-5;NDM-5
GCA_021871435.3	USA	North America	ST147	iuc 1	-	-	rmpA2_6*-47%	unknown (KL64)	1	CTX-M-15;CTX-M-15	NDM-5;NDM-5
GCA_021871455.3	USA	North America	ST111	iuc 1	-	-	rmpA2_6*-47%	KL63	1	CTX-M-15;CTX-M-15	NDM-5;NDM-5
GCA_021871475.3	USA	North America	ST147	iuc 1	-	-	rmpA2_6*-47%	unknown (KL64)	1	CTX-M-15;CTX-M-15	NDM-5;NDM-5
GCA_021871495.3	USA	North America	ST111	iuc 1	-	-	rmpA2_6-60%	KL63	1	CTX-M-15;CTX-M-15	NDM-5;NDM-5
GCA_021871535.3	USA	North America	ST147	iuc 1	-	-	rmpA2_9	unknown (KL64)	1	CTX-M-15;CTX-M-15	NDM-5;NDM-5
GCA_021871545.3	USA	North America	ST147	iuc 1	-	-	rmpA2_6*-47%	unknown (KL64)	1	CTX-M-15;CTX-M-15	NDM-5;NDM-5
GCA_021871575.3	USA	North America	ST147	iuc 1	-	-	rmpA2_6*-47%	unknown (KL64)	1	CTX-M-15;CTX-M-15	NDM-5;NDM-5
GCA_021871595.3	USA	North America	ST147	iuc 1	-	-	rmpA2_6*-47%	unknown (KL64)	1	CTX-M-15;CTX-M-15	NDM-5;NDM-5
GCA_021871605.3	USA	North America	ST6873	iuc 1	-	-	rmpA2_6-60%	unknown (KL64)	1	CTX-M-15;CTX-M-15	NDM-5;NDM-5
GCA_021871715.1	Japan	East Asia	ST268	iuc 1	iro 1	rmp 1; KpVP-1 (truncated)	rmpA2_8-60%	unknown (KL20)	1	CTX-M-2;CTX-M-2	IMP-6;IMP-6
GCA_021871735.1	Japan	East Asia	ST65	iuc 1	iro 1	rmp 1; KpVP-1 (truncated)	rmpA2_5*-54%	KL2	1	CTX-M-2;CTX-M-2	IMP-6;IMP-6
GCA_021871755.1	Japan	East Asia	ST65	iuc 1	iro 1	rmp 1; KpVP-1 (truncated),-	rmpA2_6-60%	KL2	1	CTX-M-2;CTX-M-2	IMP-6;IMP-6
GCA_021871795.1	Japan	East Asia	ST412	iuc 1	iro 1	rmp 1; KpVP-1,-	rmpA2_8*	KL57	1	-	-
GCA_021871835.1	Japan	East Asia	ST268	iuc 1	iro 1	rmp 1; KpVP-1 (truncated)	rmpA2_2*-47%	KL20	1	-	-
GCA_021871855.1	Japan	East Asia	ST86	iuc 1	iro 1	rmp 1; KpVP-1	-	KL2	1	-	-
[truncated: 10,963 more rows]

## Sheet: Table S2
List of countries under each region from NCBI:
Africa	No. of genomes	East Asia	No. of genomes	Europe	No. of genomes	Middle East	No. of genomes	North America	No. of genomes	Oceania	No. of genomes	North America	No. of genomes	South Asia	No. of genomes	South East Asia	No. of genomes
Algeria	1	China	6331	Austria	1	Armenia	2	Canada	31	Australia	132	Argentina	1	Afghanistan	6	Cambodia	1
Egypt	47	Hong Kong	98	Belarus	12	Israel	6	Mexico	9	New Zealand	11	Brazil	5	Bangladesh	122	Laos	4
Ethiopia	1	Japan	473	Belgium	32	Jordan	13	Trinidad	1			Chile	6	India	640	Malaysia	21
Ghana	7	South Korea	28	Croatia	3	Kazakhstan	5	USA	1926			Colombia	3	Iran	5	Myanmar	2
Kenya	4	Taiwan	74	Czech	4	Kuwait	7					Ecuador	19	Nepal	8	Philippines	2
Libya	7			Czechia	2	Lebanon	19					Guadeloupe	21	Pakistan	22	Singapore	120
Madagascar	5			Denmark	8	Oman	25					Paraguay	5			Thailand	214
Nigeria	3			Estonia	1	Qatar	14					Peru	13			Vietnam	297
South Africa	4			Finland	2	Saudi	197
Sudan	1			France	132	Turkey	68
Tanzania	2			Germany	292
Uganda	3			Greece	3
				Hungary	2
				Ireland	95
				Italy	339
				Latvia	6
				Lithuania	6
				Netherlands	54
				Norway	242
				Poland	12
				Portugal	1
				Romania	7
				Russia	371
				Serbia	3
				Slovakia	13
				Slovenia	2
				Spain	21
				Switzerland	20
				Ukraine	34
				United Kingdom	149

## Sheet: Table S3
Figure 1:	Total	iucA	iro	rmpADC	rmpA2	Peg-344
Africa	85	81	26	53	55	71
East Asia	7004	6665	2687	4321	5850	5441
Europe	1869	1826	424	886	827	1215
Middle East	356	352	18	84	298	287
North America	1967	1933	186	348	1339	1630
Oceania	143	129	89	98	73	93
South America	73	69	51	24	11	19
South East Asia	661	638	342	255	264	348
South Asia	803	796	162	178	362	396

## Sheet: Table S4
Locations	HVKp	CR-HVKp+HV-CRKp
Africa (n = 17)	17	0
East Asia (n = 1796)	1796	339
Europe (n = 242)	242	88
Middle East (n = 12)	12	2
North America (n = 68)	68	13
Oceania (n = 38)	38	1
South America (n = 10)	10	4
South Asia (n = 111)	111	19
South East Asia (n = 131)	131	55

## Sheet: Table S5
Locations	HVKp	CR-HVKp		Locations	HVKp	HV-CRKp
Africa (n = 11)	11	0		Africa (n = 6)	6	0
East Asia (n = 995)	995	108		East Asia (n = 801)	801	231
Europe (n = 192)	192	73		Europe (n = 50)	50	15
Middle East (n = 6)	6	0		Middle East (n = 6)	6	2
North America (n = 56)	56	7		North America (n = 12)	12	6
Oceania (n = 26)	26	1		Oceania (n = 12)	12	0
South America (n = 10)	10	4		South America (n = 0)	0	0
South Asia (n = 59)	59	12		South Asia (n = 52)	52	7
South East Asia (n = 80)	80	35		South East Asia (n = 51)	51	22

## Sheet: Table S6
Sequence Types	iucA	iroB	RmpADC	rmpA2	Peg_344
ST23	98.6873	93.8224	90.4247	85.0965	89.9779
ST25	82.6389	85.4167	79.1667	32.6389	34.0278
ST65	98.7261	97.1338	93.3121	85.6688	92.8287
ST86	92.6254	91.7404	85.5457	60.472	89.0915
ST375	100	100	90.1639	80.3279	83.0998
ST1660	100	100	100	87.5	100
ST11	98.3227	9.10543	53.6475	92.6518	83.0106
ST15	99.5562	1.62722	5.47337	89.497	85.8135
ST29	72.4771	93.578	89.9083	62.3853	69.7295
ST45	98.7261	3.18471	3.50318	74.8408	79.7626
ST111	79.5918	22.449	22.449	72.9592	69.3878
ST147	99.4493	0.157356	35.2478	69.8662	90.3655
ST231	99.4334	0	0.141643	0	0
ST268	96.4467	93.401	81.2183	86.2944	87.2905
ST307	99.3711	0	59.1195	68.5535	93.0818
ST383	97.4359	0	65.812	68.3761	86.2752
ST395	98.1723	3.39426	18.2768	32.8982	77.3287
ST412	82.0628	97.7578	95.0673	78.0269	75.8387
ST2096	99.7305	0	0.808625	90.8356	92.7053
ST4843	100	0	0	9.70149	88.806

## Sheet: Table S7
Sequence Types	Africa	East Asia	Europe	Middle East	North America	Oceania	South America	South Asia	Southeast Asia
ST23	2	760	252	7	55	18	10	72	119
ST25	1	80	22	1	7	4	1	0	28
ST65	4	230	11	0	9	5	0	11	44
ST86	8	157	51	1	20	25	7	15	55
ST375	0	47	7	0	3	1	0	0	3
ST1660	0	16	0	0	0	0	0	0	0
ST11	3	3665	17	15	16	4	15	16	5
ST15	1	509	40	1	16	1	0	33	75
ST29	1	91	3	0	3	0	1	6	4
ST45	0	41	7	1	258	2	0	0	5
ST111	0	43	3	0	150	0	0	0	0
ST147	17	14	408	49	737	0	14	32	0
ST231	1	27	105	32	65	8	0	321	147
ST268	0	165	13	1	2	0	0	4	12
ST307	0	11	120	9	18	0	0	1	0
ST383	17	14	23	25	38	0	0	0	0
ST395	0	4	287	5	40	1	0	46	0
ST412	2	201	4	0	7	3	0	2	4
ST2096	0	0	38	179	18	14	0	117	5
ST4843	0	0	0	0	129	0	0	5	0

## Sheet: Table S8
Sequence Types	KL1	KL102	KL112	KL2	KL20	KL24	KL3	KL30	KL47	KL49	KL51	KL54	KL57	KL62	KL63	KL64	Others
ST23	1166	0	0	0	0	0	0	0	0	0	0	0	40	0	0	0	89
ST25	0	0	0	119	0	0	0	0	0	1	0	0	0	0	0	0	24
ST65	0	0	0	286	0	0	0	0	0	0	0	0	0	0	0	0	28
ST86	0	0	0	282	0	0	0	0	0	0	0	0	0	0	0	0	57
ST375	0	0	0	57	0	0	0	0	0	0	0	0	0	0	0	0	4
ST1660	16	0	0	0	0	0	0	0	0	0	0	0	0	0	0	0	0
ST11	0	0	0	0	0	0	0	0	676	0	0	0	0	0	0	2724	356
ST15	0	0	422	0	0	99	0	0	0	0	0	0	0	0	0	0	155
ST29	2	0	0	0	0	0	0	0	0	0	0	100	0	0	0	0	7
ST45	0	0	0	0	0	60	0	0	0	0	0	0	0	220	0	0	34
ST111	0	0	0	0	0	0	0	0	0	0	0	0	0	0	191	0	5
ST147	0	0	0	0	23	0	0	0	0	0	0	0	0	0	0	546	702
ST231	0	0	0	0	0	0	0	0	0	0	581	0	0	0	0	17	108
ST268	0	0	0	0	158	0	1	0	0	0	0	0	0	0	0	0	38
ST307	0	129	0	0	0	0	0	0	0	0	0	0	0	0	0	0	30
ST383	0	0	0	0	0	0	0	89	0	0	0	0	0	0	0	0	28
ST395	0	0	0	171	0	0	0	0	0	0	0	0	0	0	0	60	152
ST412	0	0	0	0	0	0	0	0	0	0	0	0	201	0	0	0	22
ST2096	0	0	0	0	0	0	0	0	0	0	0	0	0	0	0	322	49
ST4843	0	0	0	0	0	0	0	0	0	0	0	0	0	0	0	132	2

## Sheet: Table S9
Region	iucA	iro	rmpADC	rmpA2	Total	iucA	iro	rmpADC	rmpA2	p-value	BH_adjusted_p
Africa	81	26	53	55	215	37.67	12.09	24.65	25.58	0.004	0.005143
East Asia	6665	2687	4321	5850	19523	34.14	13.76	22.13	29.96	0.021	0.023625
Europe	1826	424	886	827	3963	46.08	10.7	22.36	20.87	0	0
Middle East	352	18	84	298	752	46.81	2.39	11.17	39.63	0	0
North America	1933	186	348	1339	3806	50.79	4.89	9.14	35.18	0	0
Oceania	129	89	98	73	389	33.16	22.88	25.19	18.77	0.222	0.222
South America	69	51	24	11	155	44.52	32.9	15.48	7.1	0	0
South East Asia	638	342	255	264	1499	42.56	22.82	17.01	17.61	0.001	0.0015
South Asia	796	162	178	362	1498	53.14	10.81	11.88	24.17	0	0
