# Supplementary material for: Regional Distribution of Klebsiella pneumoniae Virulence Genes: Insights from a Comparative Genome Analysis
Source: Research Square preprint supplement (doi:10.21203/rs.3.rs-7763903/v1), 2025-12-04
Supplement: Supplementary file 2 [file b5f69bfbfc4bb1bc10725e61.docx]

**Figure 1**

**Fig. 1 Geographic distribution of virulence-associated genes in Kp.
Bar plots depict the percentage prevalence of five hypervirulence-associated genes (*iucA, iroB, rmpADC, rmpA2,* and *peg-344*) across different global regions.
The height of each bar represents the proportion (%) of genomes from that region positive for each gene, based on Kleborate analysis. The total number of genomes analyzed per region is indicated as (n).**

**Figure 2**

**Fig. 2 Distribution of isolates with convergence of hypervirulence and carbapenem resistance in Kp. (A) Geographic distribution of all the convergence (in Orange) and only hvKp (in Brown), the percentages shown across different regions.**

**(B) Further the data was distributed into two groups based on STs, to observe which group has abundant converging isolates, Group A primarily comprised STs usually associated with hypervirulence, while Group B consisted of STs linked to multidrug resistance.**

**Figure 3**

**Fig. 3 ST-wise distribution of virulence genes, antimicrobial resistance, and capsular (K) locus diversity in hvKp. (A) Heatmap representation showing the distribution of virulence-associated genes (*rmpA, rmpA2, iucA, iroB,* and *peg-344*) across major STs. (B) Distribution of virulence genes (e.g., *rmpA, rmpA2, iucA, iroB* and *peg-344*) among the same STs. (C) Capsular (K) locus diversity across STs, focusing on dominant capsule types such as KL1, KL2, KL51, and KL64. Percentage values represent the proportion of genomes within each ST that harbor the respective gene or K-locus type.**

**Supplementary Figure 1**

**Supplementary Figure 1:** **Frequency and genetic organization of co-occurring virulence markers in *Klebsiella pneumoniae* isolates. (A) The bar graphs represent the number of isolates carrying two or three virulence markers. Among isolates with two markers, the most frequent combination was *rmpA2* and *iucA*, whereas in those carrying three markers*, rmpA, rmpA2, and iucA* were predominant.**

(**B) The upset plot below with dots and solid lines indicates gene co-occurrence patterns observed in the isolates.**
